# Supplementary material
Source: PubMed Central journal article supplement (PMC5070964)

## Methods

### Mice Genotyping

We genotyped offspring by PCR using the following primer sequences: Ctsk-Cre, P1N 5'-CCTAATTATTCCTTCCGCCAGGATG-3', P2N 5'-CCAGGTTATGGGCAGAGATTTGCTT-3', P3N 5'-CACCGGCATCAACGTTTTCTTTTCG-3', Plekhm1 floxed allele, LoxgtF 5'-TGAATCTGCTTGGTTGGTTG, LoxgtR 5'-CAAACCTCGGGGTTTGTGTTG, Plekhm1 null allele, LoxgtF 5'-TGAATCTGCTTGGTTGGTTG-3', FrtgtR 5'-CTAAGCAGCCAAGGACAAGG-3'.

### Antibodies and reagents

The antibodies and their applications are listed in Supplemental Table 6. The rabbit polyclonal antibody against the N-terminal portion of murine PLEKHM1 was generated and affinity purified by 21<sup>st</sup> Century Biochemicals (MA, USA). All chemical compounds were from Sigma-Aldrich. Cell culture alpha-MEM (78-5077EB) and 10 × Trypsin/EDTA (15400-054) were purchased from Life Technologies. High glucose DMEM (D-5648) and 10 × penicillin–streptomycin-l-glutamine (PSG) (G1146) were obtained from Sigma-Aldrich. Fetal bovine serum (FBS) was purchased from Hyclone.

### Bone marrow monocyte (BMM) and osteoclast cultures

Whole bone marrow was extracted from tibia and femurs of one or two 8–10 week-old mice. Red blood cells were lysed in buffer (150 mM NH<sub>4</sub>Cl, 10 mM KNCO<sub>3</sub>, 0.1 mM EDTA, pH 7.4) for 5 minutes at room temperature. 5 × 10<sup>6</sup> bone marrow cells were plated onto a 100mm petri-dish and cultured in α-10 medium (α-MEM, 10% heat-inactivated FBS, 1 × PSG) containing 1/10 volume of CMG 14–12 (conditioned medium supernatant containing recombinant M-CSF at 1μg/ml) (1) for 4 to 5 days. Pre-osteoclasts and osteoclasts were generated by culturing BMMs (at density of 160/mm<sup>2</sup>) with 1/100 vol of CMG 14–12 culture supernatant and 100 ng/ml of recombinant RANKL.

### Osteoblast cultures

Primary osteoblasts were harvested from calvaria or cultured from bone marrow stromal cells as described in Supplemental Methods. Three to five calvariae/genotype were pooled and incubated with 4mM EDTA/PBS at 37°C for 10min for three times. The calvariae were then incubated through a serial digestion with 200U/ml collagenase (# 4196, Worthington)/PBS at 37°C for 15min with shaking. Cells in fractions 4-6 were collected and cultured at  $5 \times 10^5$  cells/150mm culture dish in  $\alpha$ -10 medium. Osteoblast differentiation (at  $2.3 \times 10^4$  cells/well of 6-well plate) was induced by 1% Ascorbic Acid (A4544, Sigma-Aldrich) and 20mM  $\beta$ -glycerolphosphate (G6251, Sigma-Aldrich)  $\alpha$ -10 medium. For osteoblast differentiation from bone marrow stromal cells,  $5 \times 10^6$  whole bone marrow cells/well of 12-well plate were cultured with  $\alpha$ -10 medium and 1% Ascorbic Acid/20mM  $\beta$ -glycerolphosphate for 14 or 21 days.

### **Mouse embryonic fibroblast (MEF) culture**

E13.5 or E14.5 mouse embryos were washed with cold PBS and cleared out the head, limbs and internal organs. The rest of tissues were teased into small pieces and incubated with  $5 \times$  Trypsin/EDTA at 4°C overnight (2). The tissues were then incubated at 37°C for 30min. The digestion was stopped by D-10 medium (DMEM with 10% heat-inactivated FBS,  $1 \times$  PSG). The cells in the supernatant were centrifuged and were cultured with D-10 medium till confluent.

### **TRAP staining**

BMMs were cultured on 48-well tissue culture plate in  $\alpha$ -10 medium with M-CSF and RANKL for 4-5 days. The cells were fixed with 4% paraformaldehyde/phosphate buffered saline (PBS) and TRAP was stained with NaK Tartrate and Naphthol AS-BI phosphoric acid (Sigma-Aldrich).

### **Alkaline phosphatase and bone nodule staining**

Calvaria or bone marrow stromal cells were cultured with  $\alpha$ -10 medium and 1% Ascorbic Acid/20mM  $\beta$ -glycerolphosphate for 14 or 21 days. Cells were fixed with 1:1 10% formaldehyde and ethanol for 10min and washed with PBS twice. Alkaline phosphatase was stained with a kit (86R-1, Sigma-Aldrich) according to the

manufacture's protocol. The mineralized bone matrix was stained with 2% Alizarin Red (pH 4.1-4.3) (A5533, Sigma-Aldrich) in osteoblasts fixed with 10% formaldehyde.

### **Resorption pit staining and medium CTx-I ELISA**

Mature osteoclasts grown on bone slices were fixed with 4% paraformaldehyde/PBS for 20 minutes. After washing twice in PBS, the cells were removed from bone slices with a soft brush. The slices were then incubated with 20µg/ml peroxidase-conjugated WGA (Wheat germ agglutinin) lectin (L-7017, Sigma-Aldrich) for 30-60 min at room temperature. After washing in PBS twice, 0.52 mg/ml 3,3'-diaminobenzidine (D-5905, Sigma-Aldrich) was added onto the slices for 30 minutes. Samples were mounted with 80% glycerol/PBS. Medium CTx-1 concentration of day-5 OC culture was measured using CrossLaps for Culture ELISA kit (AC-07F1, ImmunoDiagnosticSystems) following the manufacture's instruction.

### **Lysosomal $\beta$ -hexosaminidase exocytosis assay**

Cells were trypsinized, counted and  $4 \times 10^4$  WT or KO cells were incubated or not with 300 ng/mL SLO (or without SLO, for controls) in 350 µl of cold PBS (+Ca<sup>2+</sup>) on ice for 5 min, followed by incubation at 37 °C for 2 min. After 10 min centrifugation at 400 x the supernatants containing exocytosed lysosomal enzymes were incubated 1:1 with sodium citrate-phosphate buffer, pH 4.5, in the presence of 0.75 mM of  $\beta$ -hexosaminidase substrate (4-methy-lumbelliferyl-*N*-acetyl- $\beta$ -D-glucosaminide dihydrate (SIGMA - #M2133)) for 30 min. 100 µl of each sample were transferred to a 96 well plate and the reaction stopped with 25 µl of 2 M Na<sub>2</sub>CO<sub>3</sub> and 1M glycine, pH 9.0. Readings were taken in ELISA plate reader (Spectra max – Molecular Devices) at 362 nm excitation / 448nm emission. To obtain total extracts cells were solubilized 1% NP40 in PBS. A dilution of the extracts (1:10) was used to determine the total  $\beta$ -hexoaminidase activity for each cell type and the exocytosis results were expressed as percentage of the total enzyme content in the cells.

### ***Coxiella burnetii* phagocytosis assay**

Bone marrow macrophages (BMMs) were cultured ( $1 \times 10^5$  cells per mL) on glass coverslips (microscopy) or in glass-bottomed tissue culture plates (mCherry expression) in RPMI 1640 medium with 10% fetal bovine serum

(FBS; Invitrogen) at 37°C and 5% CO<sub>2</sub>. BMMs were infected with avirulent *Coxiella burnetii* (Nine Mile phase II, RSA 439) expressing mCherry (1) at an MOI of ~15 organisms, the same for microscopy and phagocytosis.

For microscopy, cells were washed 3 times with cold PBS then fixed and permeabilized with 100% cold methanol. After fixation, cells were washed 3 times with PBS and blocked in PBS containing 0.5% BSA overnight at 4°C. A monoclonal antibody against LAMP-1 (1:300, 1D4B, Developmental Studies Hybridoma Bank, University of Iowa, Iowa City, IA) was used to detect the *C. burnetii* parasitophorous vacuole. Rabbit anti-sera raised against *C. burnetii* was used to detect bacteria. 4',6-diamidino-2-phenylindole (DAPI; Invitrogen) was used to detect host and bacterial DNAs. Coverslips were mounted in MOWIOL and visualized using a Nikon Ti-U microscope (Nikon). A D5-QiMc digital camera obtained images and analysis was performed using NIS-Elements software (Nikon).

For phagocytosis assays, fluorescence of mCherry-expressing *C. burnetii* was quantified in infected BMMs cultured in glass-bottomed plates using a SynergyHi Microplate Reader (585 excitation 620nm emission, BioTek). Background from uninfected cells was subtracted from all samples to determine final mean fluorescence intensity (MFI).

### **RNA isolation and qPCR**

Total RNA was purified using RNeasy mini kit (Qiagen) according to the manufacturer's protocol. First-strand cDNAs were synthesized from 0.5-1 µg of total RNA using the High Capacity cDNA Reverse Transcription kits (Life Technologies) following the manufacturer's instructions. TaqMan quantitative real-time PCR was performed using the following primers from Life Technologies: *Acp5* (Mm00475698\_m1); *Bglap* (osteocalcin) (Mm03413826\_mH); *CalcR* (Mm00432282\_m1); *Ctsk* (Mm00484039\_m1); *Def8* (Mm00459823\_m1); *Fam98a* (Mm01223835\_m1); *Ndel1* (Mm00502730\_m1); *Nfatc1* (Mm00479445\_m1); *Plekhm1* (Mm00805593\_m1); *Runx2* (Mm00501584\_m1). Samples were amplified using the StepOne<sup>Plus</sup> real-time PCR system (Life Technologies) with an initial denaturation at 95 °C for 10 min, followed by 40 cycles of 95 °C for 15 s and 60 °C for 1 min. The relative cDNA amount was calculated by normalizing to that of the mitochondrial gene *Mrps2*, which is steadily expressed in both BMMs and osteoclasts, using the  $\Delta$ Ct method.

## **DNA isolation and gene copy number determination**

Soft tissues, tibiae and vertebrae were collected from three mice/genotype. The osteocyte enriched cortical bone was prepared as following. The proximal and distal ends of tibia were cut off, bone marrow were flushed out completely, the periosteum was scraped away from bone surface. The remaining cortical bones were incubated in 14% ethylenediaminetetraacetic acid (EDTA) for 1 week. The genomic DNAs of the cells and tissues were purified using DNeasy Blood & Tissue kit (Qiagen) according to the manufacture's protocol. The custom-designed Taqman assay primer of the exon 3 of murine *Plekhm1* was purchased from Thermo-Fisher Scientific. The gene copy number was normalized to murin transferrin receptor 1 locus (Thermo-Fisher).

## **Western blotting**

Cultured cells were washed with ice-cold PBS twice and lysed in 1 x RIPA buffer (R-0278, Sigma) containing 1 mM DTT and Complete Mini EDTA-free protease inhibitor cocktail (04693159001, Roche). After incubation on ice for 30 min, the cell lysates were clarified by centrifugation at 14,000 rpm for 15 min at 4°C. Ten to thirty µg of total protein were subjected to 8% or 10% SDS-PAGE gels and transferred electrophoretically onto polyvinylidene difluoride membrane (IPVH00010, EMD Millipore) by a semi-dry blotting system (Bio-Rad). The membrane was blocked in 5% fat-free milk/Tris-buffered saline for 1 hour and incubated with primary antibodies at 4°C overnight followed by secondary antibodies conjugated with horseradish peroxidase (Santa Cruz Biotechnology). After rinsing 3 times with Tris-buffered saline containing 0.1% Tween 20, the membrane was subjected to western blot analysis with enhanced chemiluminescent detection reagents (WBKLS0100, EMD Millipore).

## **Immunoprecipitation**

Protein G magnetic beads (S1430, New England BioLabs) were pre-coated with mouse monoclonal anti-HA or anti-FLAG antibodies at 5µg antibody/20µl beads in lysis buffer [20mM Tris, 120mM NaCl, 1mM EDTA, 1mM EGTA, 2.5mM Sodium Pyrophosphate, 0.5% NP-40, 1 × Complete Mini EDTA-free protease inhibitor cocktail and 1 × Halt phosphatase inhibitor cocktail (#1862495, Thermo-Fisher Scientific)] at 4°C for 2 hours with rotation. The beads were washed three times with lysis buffer and added into 293-T or osteoclast cell lysates.

Lysates were incubated at 4°C for one hour and washed three times with the washing buffer (the lysis buffer with 0.2% NP-40). The beads were boiled in 2x SDS sample buffer for 5 min. Proteins were separated by 8 or 10% SDS-PAGE gels.

### **Immunofluorescence and laser confocal scanning microscopy**

For staining of LAMP-2, cells were fixed with 4% paraformaldehyde in PBS for 20 min. None-specific binding was blocked by PBS/0.2% BSA/0.1% Saponin (PBSBS) for 30 min, followed by incubation with rat monoclonal anti-LAMP-2 antibody (GL2A7) in PBSBS for 1 hour. For EEA1 labeling, cells were fixed and penetrated at -20°C with methanol for 5 minutes and acetone for 30 s, followed by blocking with PBS/0.2% BSA for 30 min. Cells were then incubated with polyclonal or monoclonal anti-EEA1 (Supplementary Table3) in PBS/0.2% BSA for 1 hour. For rest of immunofluorescent staining, cells were fixed with 4% paraformaldehyde in PBS for 20min and permeabilized with 0.1% Triton X-100/PBS for 10min. None-specific binding was blocked by PBS/0.2% BSA for 30min. The primary antibodies (Supplementary Table3) were incubated in PBS/0.2% BSA for 1 hour. After three times 5-min-wash, cells were incubated with the respective fluorescent labeled secondary antibodies (Jackson ImmunoResearch Laboratories) for 45min. Samples were mounted with 90% glycerol/PBS. Immunofluorescence-labeled cells cultured on glass coverslips were observed under a Zeiss AxioImager Z1 fluorescent microscope equipped with Zeiss AxioCam MRm monochromatic and MR5c color cameras and a set of fluorescent filters. The images were acquired with Zeiss Axiovision 4.9 software. Osteoclasts cultured on bone slices were examined and analyzed using a Zeiss LSM 510 Meta laser confocal scanning microscope run by Zeiss Zen 2009 software.

### **Electron microscopy**

Osteoclasts cultured on bovine bone slices were fixed with 5% glutaraldehyde in 0.16 M collidine buffer (pH 7.4) for 3 h. Bone slices were decalcified in 5% EDTA/0.1% glutaraldehyde for 3 days. Cells were postfixed in 2% OsO<sub>4</sub>/3% K-ferrocyanide for 2 h, dehydrated in ethanol, and embedded in Epon LX 112. Ultra-thin sections were stained briefly with lead citrate and examined using a FEI Technai F20 Transmission Electron Microscope equipped with FEI TEM Imaging & Analysis software.

## Receptor degradation assay

Osteoclasts were cultured in 6-well plates with M-CSF and RANKL for 5 days. Cells were washed with PBS and incubated in serum-free  $\alpha$ -MEM with 100ng/ml EGF (Life Technologies) or M-CSF (R&D). After 0min, 15min, 30min, 60min, and 120min of growth factor stimulation, osteoclasts were lysed with RIPA buffer and subjected to immune-blotting analysis.

## Transferrin and Dextran pulse-chase experiments

Osteoclasts cultured on glass coverslips in a 24-well plate were washed with cold PBS and incubated in serum-free  $\alpha$ -MEM with M-CSF and RANKL on ice for 15min to block endocytosis. 200nM human holo-Transferrin (T0665, Sigma-Aldrich) was added and cells were incubated on ice for 30min to allow Transferrin binding to Transferrin receptor on the plasma membrane. Cells were washed with cold medium. Osteoclasts were then incubated at 37°C for the indicated time-points before fixed by 4% paraformaldehyde in PBS for 20 min and processed for immunofluorescence.

Osteoclasts cultured in a 35mm culture dish were incubated with 0.5mg/ml Dextran tetramethylrhodamine (10,000MW, D-1868, Life Technologies) for 2 hours. Cells were washed three times and 35mm-dish was put into a Pathology Devices Live Cell stage insert set to 37°C, 5% CO<sub>2</sub>, 80% Humidity. Live-cell imaging was captured using a Zeiss AxioObserver fluorescent microscope at 1min intervals for 2 hours.

## Construction of vectors

The full-length murine *Plekhm1*, *Rab7* and LAMP-2a were amplified by PCR with specific primers (supplemental Figure 7) and Pfx DNA polymerase (Life Technologies) from a mature osteoclast cDNA library generated in our laboratory. The murine cDNAs encoding other proteins were amplified by PCR using the following templates purchased from Open Biosystems GE Dharmacon: Clasp2 (MMM1013-211693777), Def8 (MMM1013-202761163), Fam98a (MMM4769-202762410), KIFc1 (MMM1013-202761893), Map3k7 (Tak1, MMM1013-202762097), Nde11 (MMM1013-202859039), Rap1b (MMM1013-202766273), Tpx2 (MMM1013-202859447). A series of mutants of *Plekhm1* were generated by PCR using pMX-BSR-*Plekhm1* as a template. Amplified

LAMP-2a was first cloned in-frame with GFP in a shuttle vector. The LAMP2a-GFP was then amplified by PCR. The amplified cDNAs were cloned into the pMX-IRES-BSR retrovirus vector. The sequences were verified by DNA sequencing.

### **Plasmid Transfection and Retro-/lenti-viral transduction**

A total of 3µg of plasmids were transfected into 293-T cells (ATCC) in a 6-well culture dish using TransIT-LT1 transfect reagent (MIR2300, Mirus Bio LLC) and cells were cultured for 2-3 days. The recombinant retroviral vectors of full-length and mutant forms of Plekhm1 were transfected into Plat E retroviral packing cells (ATCC) using TransIT-LT1 transfection reagent. Virus supernatants were collected at 48 h after transfection. BMMs were transduced with viruses for 24 h in  $\alpha$ -10 medium containing M-CSF and 20 µg/ml of protamine. Cells were then selected in  $\alpha$ -10 medium containing M-CSF and 1.5 µg/ml of blasticidin (203350, EMD Chemicals) for 3 days.

The LKO.1 lentiviral vectors expressing shRNA sequence targeting specific mRNAs of were purchased from Sigma-Aldrich: murine Def8 [TRCN0000105902 (Def8-sh1) and TRCN0000105900 (Def8-sh2)], murine Nde11 [TRCN0000178263 (Nde11-sh1) and TRCN0000277513 (Nde11-sh2)], murine Fam98a [TRCN0000283010 (Fam98a-sh1) and TRCN0000374721 (Fam98a-sh2)]. A firefly luciferase shRNA was used as a control (5'-GCTTACGCTGAGTACTTCGA-3'). 293-T cells cultured in a 6-well culture dish were co-transfected with a total of 3µg of LKO.1 gene transfer vector and virus packaging vectors,  $\Delta$ H8.2 and VSVG by TransIT-LT1 transfection reagent. Virus supernatants were collected after 48 hours transfection. BMMs were transduced with virus supernatant containing M-CSF and 20 µg/ml of Protamine (Sigma-Aldrich). Cells were then selected in  $\alpha$ -10 medium containing M-CSF and 6 µg/ml puromycin (Sigma-Aldrich) for 3 days.

### **Time-lapse live cell imaging**

For live-cell imaging, osteoclasts were cultured in a 35mm cell culture dish. The dish was put into a Pathology Devices Live Cell stage insert set to 37°C, 5% CO<sub>2</sub>, 80% Humidity. Live-cell imaging was performed using a Zeiss AxioObserver fluorescent microscope equipped with Photometrics CoolSnap HQ camera and Definite Focus attachment for time-lapse stability. Images were recorded with Zeiss Axiovision 4.9 software at 1min



intervals for 2 hours. A total of 120 images in Zvi format were converted into Avi format at 7 frames/s with NIH ImageJ software.

### **Mass-spectrometry and proteomic analysis**

Proteins were run on SDS-PAGE using NuPage Bis-Tris 4-12% gradient gels (Life Technologies) and stained with SimplyBlue Coomassie G-250 (Life Technologies). Each gel lane was sliced into 4 mm segments and subjected to in-gel trypsin digestion as follows. Gel slices were destained in 50% methanol (Fisher Scientific), 100 mM ammonium bicarbonate (Sigma-Aldrich), followed by reduction in 10 mM Tris[2-carboxyethyl]phosphine (Pierce) and alkylation in 50 mM iodoacetamide (Sigma-Aldrich). Gel slices were then dehydrated in acetonitrile (Fisher Scientific), followed by addition of 100 ng porcine sequencing grade modified trypsin (Promega) in 100 mM ammonium bicarbonate (Sigma-Aldrich) and incubation at 37°C for 12-16 hours. Peptide products were then acidified in 0.1% formic acid (Pierce). Tryptic peptides were separated by reverse phase Jupiter Proteo resin (Phenomenex) on a 100 x 0.075 mm column using a nanoAcquity UPLC system (Waters). Peptides were eluted using a 40 min gradient from 97:3 to 35:65 buffer A:B ratio (Buffer A = 0.1% formic acid, 0.5% acetonitrile; buffer B = 0.1% formic acid, 75% acetonitrile). Eluted peptides were ionized by electrospray (1.9 kV) followed by MS/MS analysis using collision induced dissociation on an LTQ Orbitrap Velos mass spectrometer (Thermo Scientific). MS data were acquired using the FTMS analyzer in profile mode at a resolution of 60,000 over a range of 375 to 1500 m/z. MS/MS data were acquired for the top 15 peaks from each MS scan using the ion trap analyzer in centroid mode and normal mass range with a normalized collision energy of 35.0.

Proteins were identified by searching the UniProtKB SwissProt database (2014\_02 release; restricted to *Mus musculus*; 16,656 entries) using an in-house Mascot Sever (v 2.4; Matrix Science). Peak lists were generated from raw data files by MSFileReader (v2.2; Thermo Scientific) and ExtractMSn (January 2011 release; Thermo Scientific). Charge state deconvolution and deisotoping were not performed. No contaminants were excluded from the data set. Mascot search parameters were specified as follows: trypsin digestion with up to two missed cleavages; fixed carbamidomethyl modification of cysteine; variable oxidation of methionine; variable N-terminal

acetylation; 2.0 ppm precursor ion tolerance; 0.50 Da fragment ion tolerance. A reverse-sequence decoy search was also performed. Peptide and protein identifications were validated using Scaffold (v4.3; Proteome Software). Peptide identifications were accepted at <1.0% false discovery as determined by the Scaffold Local FDR algorithm. Protein identifications were accepted at <1.0% false discovery and a minimum of two identified peptides. Protein probabilities were assigned by the Protein Prophet algorithm. Proteins with similar peptides that could not be differentiated based on MS/MS analysis alone were grouped to satisfy the principles of parsimony. Proteins sharing significant peptide evidence were grouped into clusters.

### **Micro-CT**

The left femurs and L4 vertebrae were cleaned of soft tissues and fixed in 10% Millonig's formalin with 0.5% sucrose for 24 hours. The bone samples were gradually dehydrated into 100% ethanol. The bones were loaded into a 12.3-mm diameter scanning tube and were imaged in a  $\mu$ CT (model  $\mu$ CT40, Scanco Medical). We integrated the scans into 3-D voxel images (1024 x 1024 pixel matrices for each individual planar stack) and used a Gaussian filter (sigma = 0.8, support = 1) to reduce signal noise. A threshold of 200 was applied to all scans, at medium resolution (E = 55 kVp, I = 145  $\mu$ A, integration time = 200ms).

### **Histology and bone histomorphometry**

30 $\mu$ g of Tetracycline per gram of mouse weight was injected into mice at day 8 and day4 prior to sacrifice. The femurs were fixed in 10% Millonig's formalin with 0.5% sucrose for 24 h and were gradually dehydrated into 100% ethanol. The left femurs were embedded undecalcified in methyl methacrylate and stained for Toluidine blue. The static and dynamic histomorphometric examination of trabecular bone was done on 5  $\mu$ m longitudinal sections with a digitizer tablet (OsteoMetrics, Inc., Decatur, GA, USA) interfaced to a Zeiss Axioscope (Carl Zeiss, Thornwood, NY, USA) with a drawing tube attachment. The right femurs were fixed in 10% Millonig's formalin for 24 h and were decalcified in 14% EDTA for 7-10 days. The bones were embedded in paraffin before obtaining 5- $\mu$ m longitudinal sections. After removal of paraffin and rehydration, sections were stained for TRAP activity and counter-stained with methyl green and osteoclasts were enumerated on the trabecular bone surface.

## Supplemental Figures

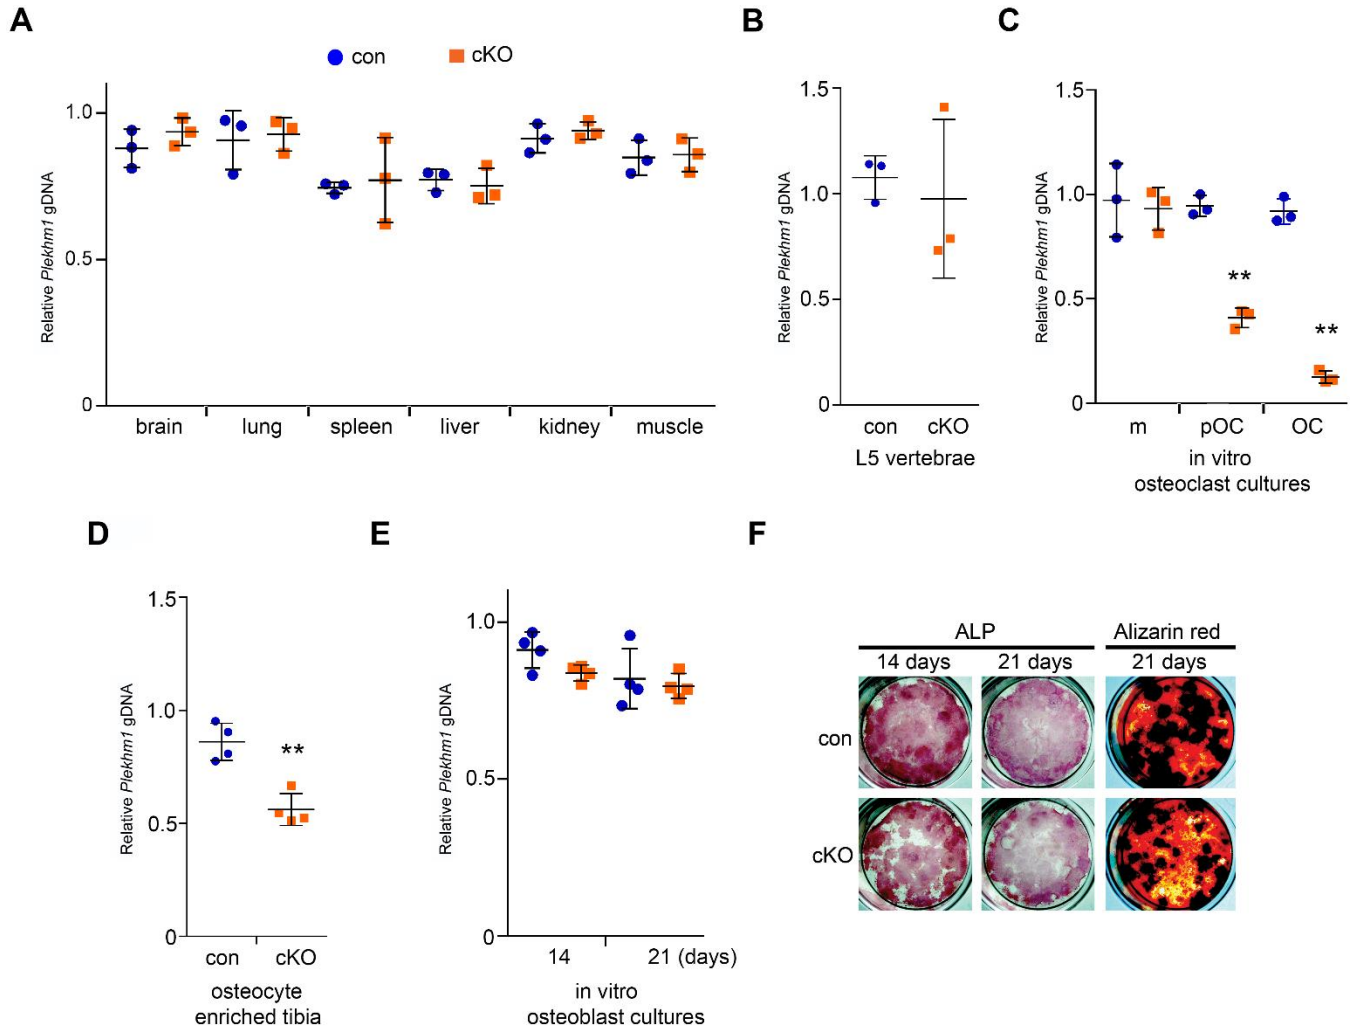

Figure 1. Deletion of murine *Plekhh1* genomic DNA by *Ctsk*-Cre. Quantitative PCR of the exon 3 of murine *Plekhh1* genomic DNA, normalized to the transferrin receptor 1 locus, using genomic DNA isolated from the indicated soft tissues (n = 3) (A), number 5 lumbar (L5) vertebrae (n = 3) (B), in vitro cultured osteoclast lineage cells (n = 3) (C), osteocyte-enriched tibia cortical bone (n = 4) (D), and osteoblasts from 14- and 21-day cultures of bone marrow stromal cells (n = 4) (E). Data in (A) to (E) are presented as scatter dot plots. The mean and standard deviation of each group are overlaid onto each column of dots. con, control; cKO, conditional knockout; m, bone marrow monocytes; pOC, pre-osteoclasts; OC, mature osteoclasts. \*\* in (C), p < 0.01 versus con by one way ANOVA. \*\* in (D), p < 0.01 versus con by Student's t-test. (F) Alkaline phosphatase (ALP) and Alizarin red bone nodule staining of 14- and 21-day cultures of osteoblasts from bone marrow stromal cells in a 12-well culture plate. Original magnification: 1 ×.

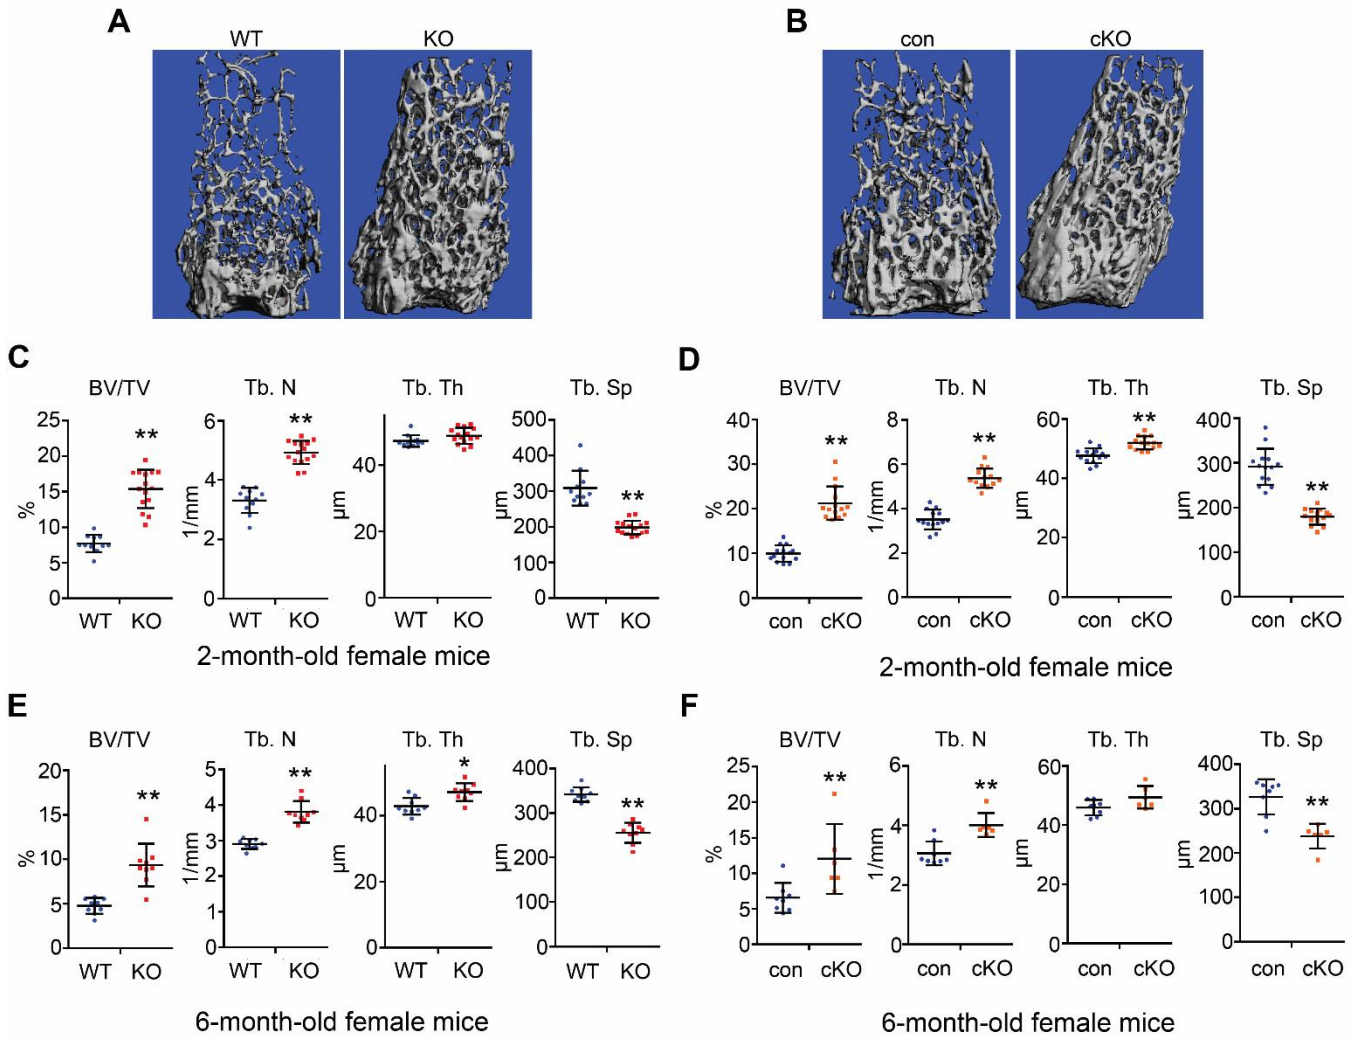

Figure 2. *Plekhm1* germline and conditional deficient female mice have increased trabecular bone mass at 2- and 6-month old of age. (A) and (C)  $\mu$ -CT images and analyses of trabecular bone compartment of the distal femurs of 2-month-old female wild type (WT) and *Plekhm1*<sup>-/-</sup> (KO) mice (n: WT = 11, KO = 15). (B) and (D)  $\mu$ -CT images and analyses of trabecular bone compartment of the distal femurs of 2-month-old female control (con) and *Plekhm1* conditional deletion (cKO) mice (n: con = 14, KO = 14). (E) and (F)  $\mu$ -CT analyses of trabecular bone compartment of the distal femurs of 6-month-old female mice (n: WT = 9, KO = 9; con = 8, cKO = 6). BV/TV, percentage of trabecular bone volume to tissue volume; Tb. N, trabecular number; Tb. Th, trabecular thickness; Tb.Sp, trabecular separation. Data in (C) to (F) are presented as scatter dot plots. The mean and standard deviation of each group are overlaid onto each column of dots. \*\*  $p < 0.01$ ; \*  $p < 0.05$ , versus WT or con by Student's t-test.

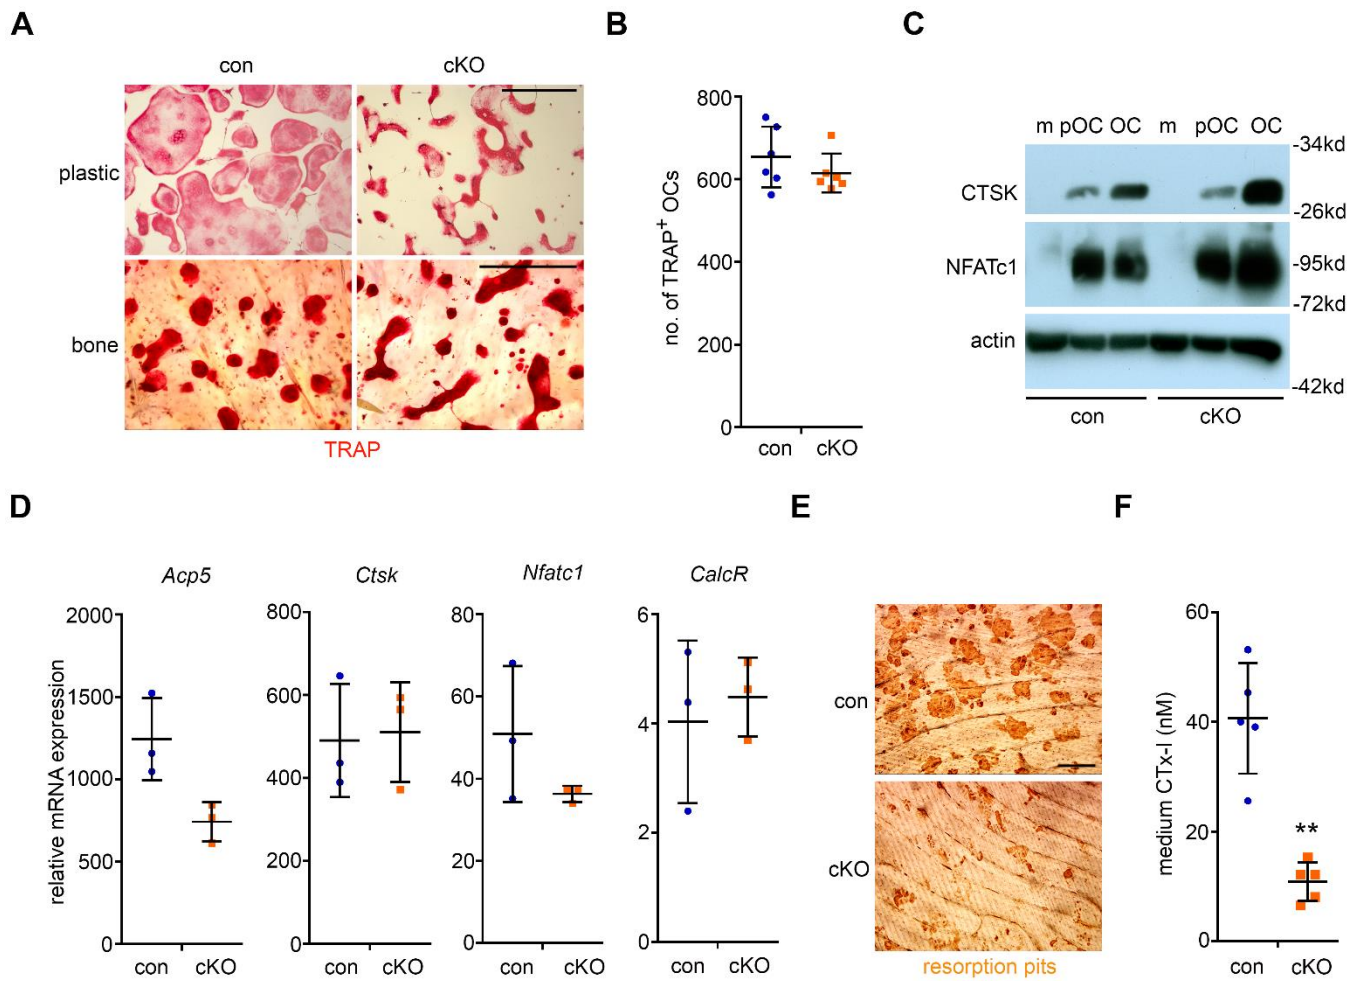

Figure 3. Loss of *Plekhl1* in osteoclasts attenuates bone resorption without affecting osteoclast differentiation. (A) Tartrate-resistant acid phosphatase (TRAP) staining of control (con) and *Plekhl1* conditional knockout (cKO) osteoclasts cultured on plastic dishes and bovine cortical bone slices. Representative images are from 6 samples/group/culture of three independent cultures from different mice. Scale bar = 200 $\mu$ m. (B) Number of TRAP<sup>+</sup> osteoclasts with more than three nuclei per well of 48-well plate (n = 6). (C) Protein expression of osteoclast markers, CTSK (cathepsin K) and NFATc1 (nuclear factor of activated T-cells, cytoplasmic 1), detected by western blotting during osteoclast differentiation. Actin served as a loading control. m, bone marrow monocytes; pOC, pre-osteoclasts; OC, mature osteoclasts. The experiment was repeated three times. (D) mRNA expression of osteoclast marker genes in mature osteoclasts measured by quantitative real-time PCR. *Acp5* (TRAP); *Ctsk*; *Nfatc1*; *CalcR* (calcitonin receptor) (n = 3). (E) Resorption pit staining of con and cKO osteoclasts cultured on bone slices. Each image is a representative of 6 bone slices/group/culture from at least three independent cultures from different mice. Scale bar = 40 $\mu$ m. (F) The amount of medium CTx-I, collagen fragments released by osteoclasts during bone resorption, was measured by ELISA (n = 5). The data in (B), (D), and (F) are presented as scatter dot plots. The mean and standard deviation of each group are overlaid onto each column of dots. \*\* p < 0.01 versus con by Student t-test.

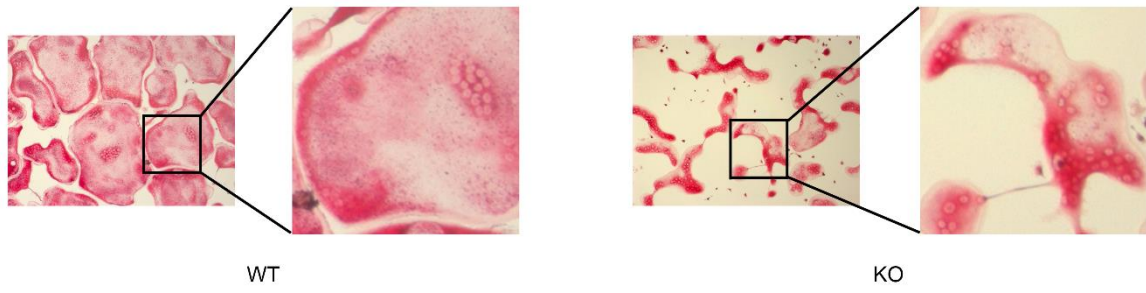

Figure 4. Enlarged images of TRAP-stained wild type (WT) and *Plekhm1* knockout (KO) osteoclasts.



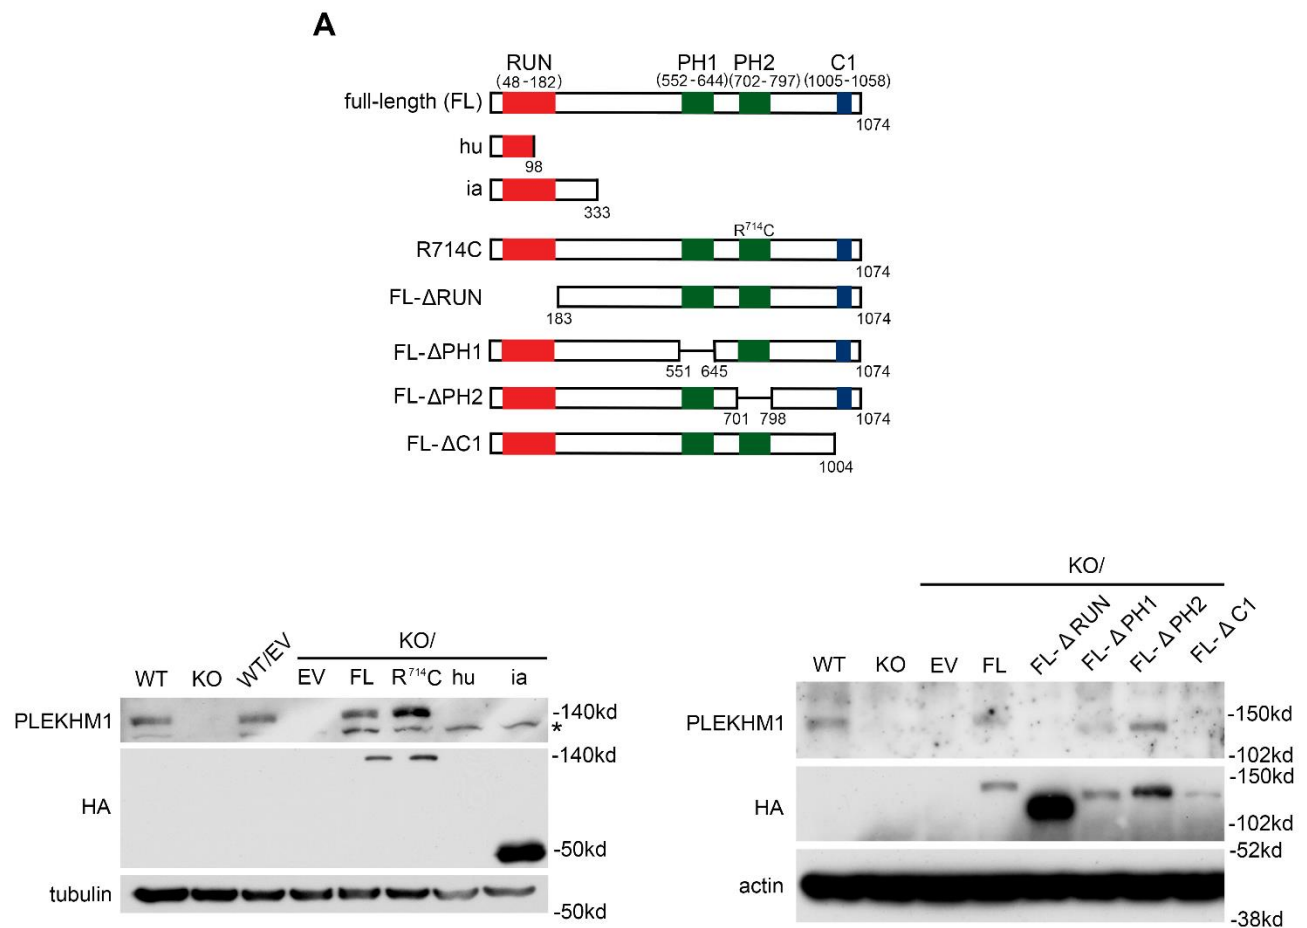

Figure 5. Protein expression of endogenous and HA tagged PLEKHM1 in osteoclasts. (A) Schematic illustration of the structural domains of full-length (FL) and mutants of PLEKHM1. Numbers indicate positions of amino acids. (B) Western blot detection of endogenous and reconstituted HA tagged FL and mutants of PLEKHM1. EV, empty vector. \*, unspecific band. Tubulin and actin served as loading controls.

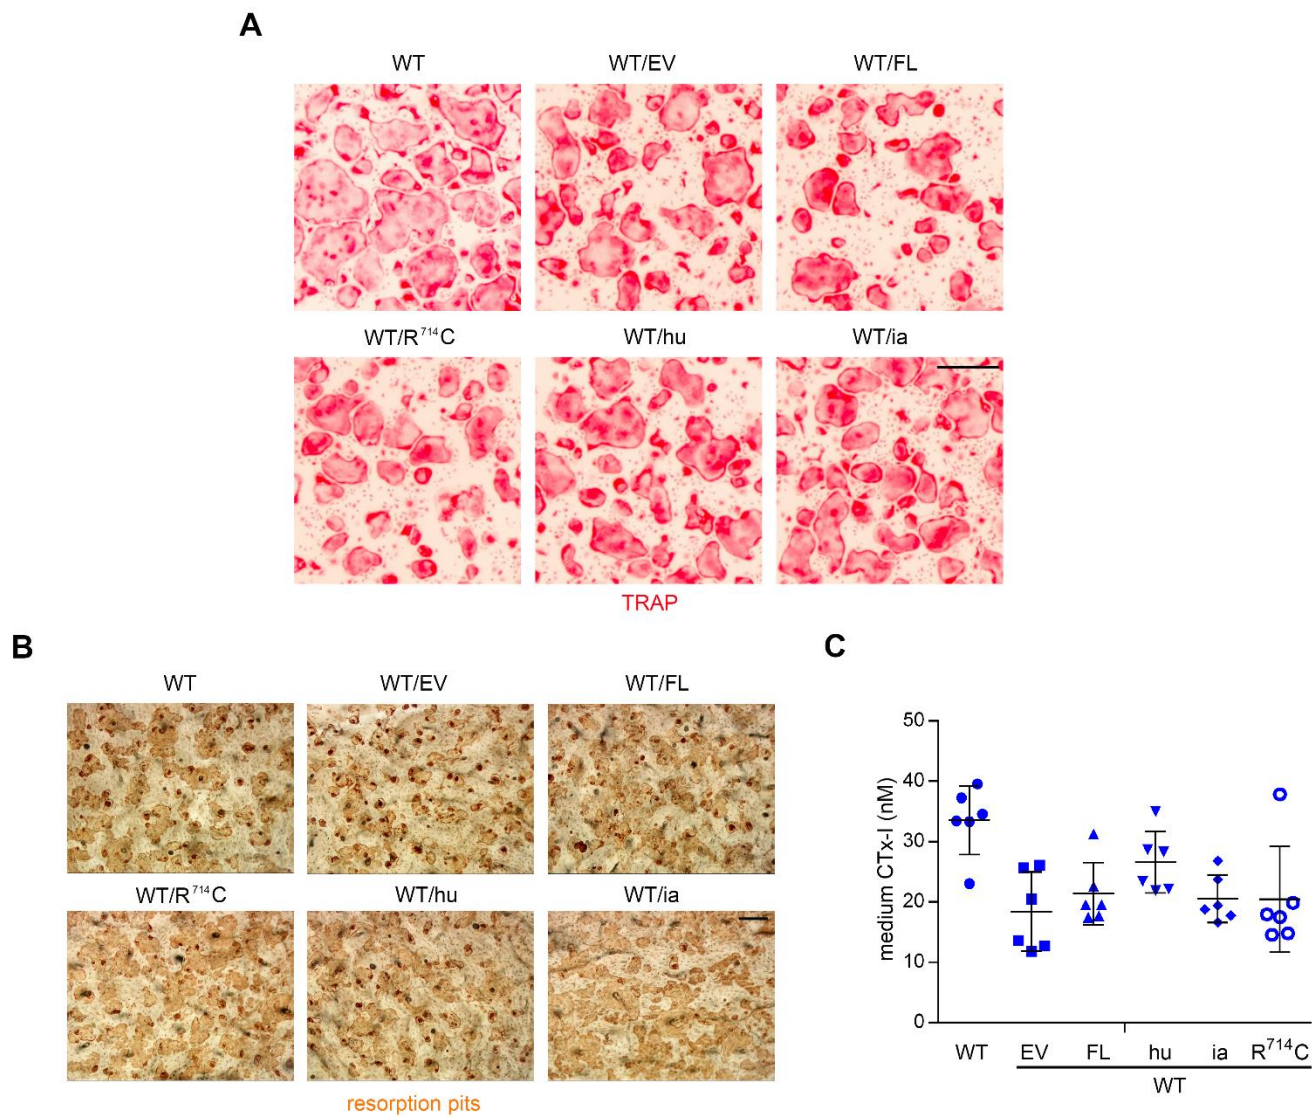

Figure 6. Retroviral transduction of PLEKHM1 mutants in wild type bone marrow monocytes has no effects on osteoclast differentiation and function. (A) TRAP staining of wild type osteoclasts expressing the empty vector (EV), the full-length (FL), the human and ia rat mutants (see supplemental Figure 5A). Scale bar = 200µm. (B) resorption pit staining. Scale bar = 40µm. (C) The amount of medium CTx-I measured by ELISA. The data are presented as scatter dot plots. The mean and standard deviation of each group are overlaid onto each column of dots. The experiments were repeated twice.



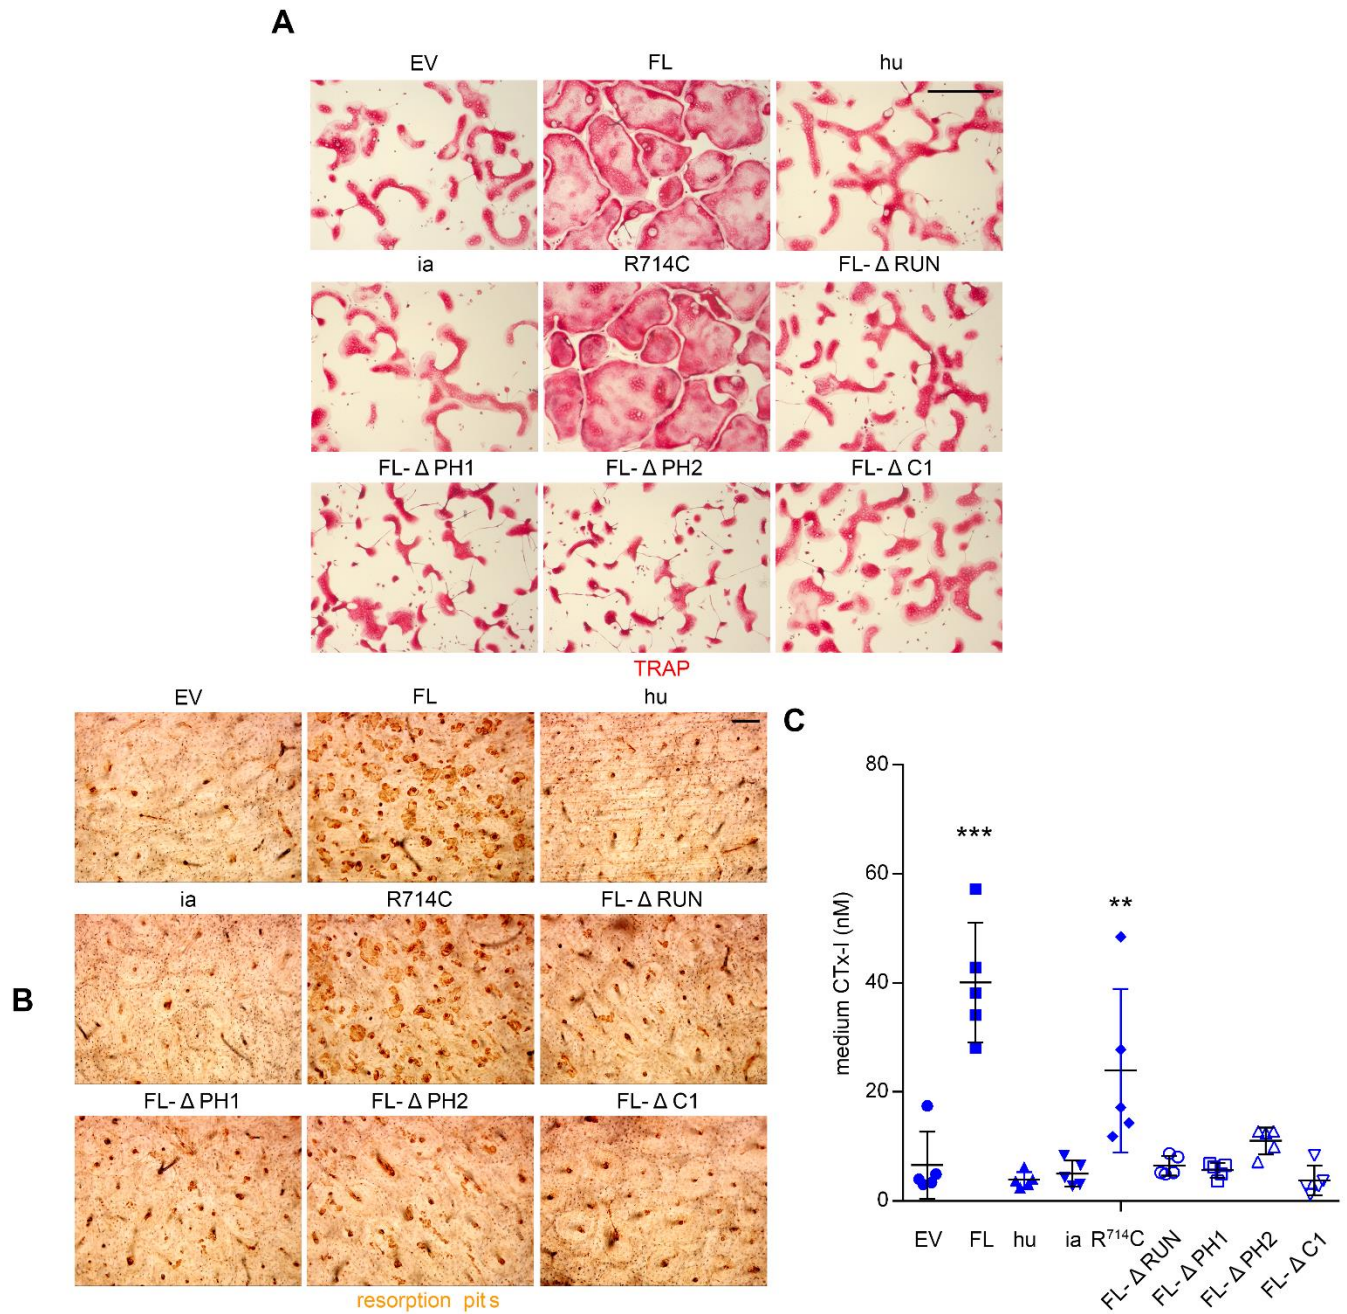

Figure 7. PLEKHM1 plays an intrinsic role in osteoclast function. (A) TRAP staining of *Plekhl1*<sup>-/-</sup> osteoclasts retrovirally transduced with the empty vector (EV), the full-length (FL) or different mutants (see supplemental Figure 5A) of murine PLEKHM1. Scale bar = 100 $\mu$ m. (B) Resorption pit staining. Scale bar = 40 $\mu$ m. The experiments in (A) and (B) were repeated at least three times using cells isolated from different mice. (C) The amount of medium CTx-I measured by ELISA (n = 6). The data are presented as scatter dot plots. The mean and standard deviation of each group are overlaid onto each column of dots. \*\*\* p < 0.001, \*\* p < 0.01 versus EV transduced osteoclasts by one-way ANOVA.

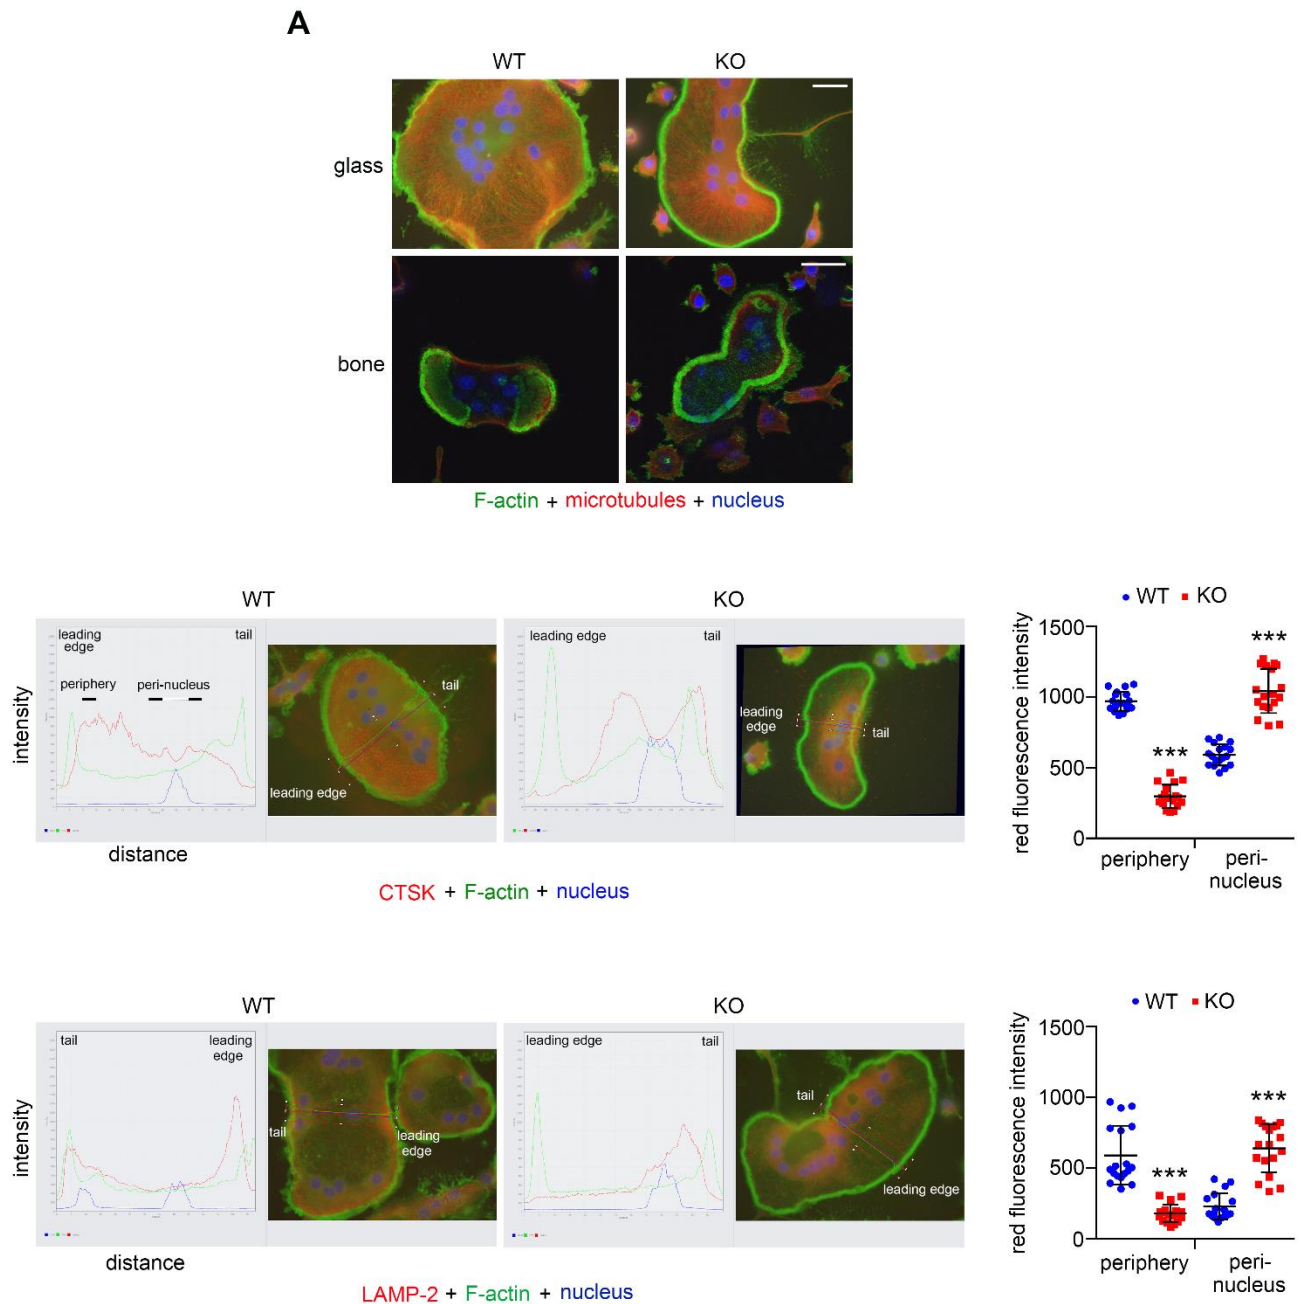

Figure 8. PLEKHM1 regulates lysosome peripheral distribution but not cytoskeleton organization in osteoclasts. (A) Immunofluorescent staining of filamentous actin (F-actin), microtubules, and nucleus in wild type (WT) and *Plekhm1*<sup>-/-</sup> (KO) osteoclasts cultured on glass coverslips (upper panels) and bone slices (lower panels). Representative images are from 6 samples/group/culture of three independent cultures from different mice. (B) and (C) Quantifications of lysosome distribution at the cell periphery and the peri-nuclear regions in immunofluorescence-stained cathepsin K (CTSK) and LAMP-2 of WT and KO osteoclasts using Zen 2.0 Blue Profile View software (Zeiss). A quantification line (the middle purple line) was drawn from the leading edge to the tail around the middle of osteoclasts. The red fluorescent intensities along 5- $\mu$ m inside the podosome-belt (green peak) at the leading edge (periphery) and 5- $\mu$ m surround the nucleus (peri-nucleus) in osteoclasts, shown in black bars, were quantified by the software. The data are presented as scatter dot plots (n = 18). The mean and standard deviation of each group are overlaid onto each column of dots. \*\*\* p < 0.001 versus WT by one-way ANOVA. The analysis was performed in a double-blinded manner.

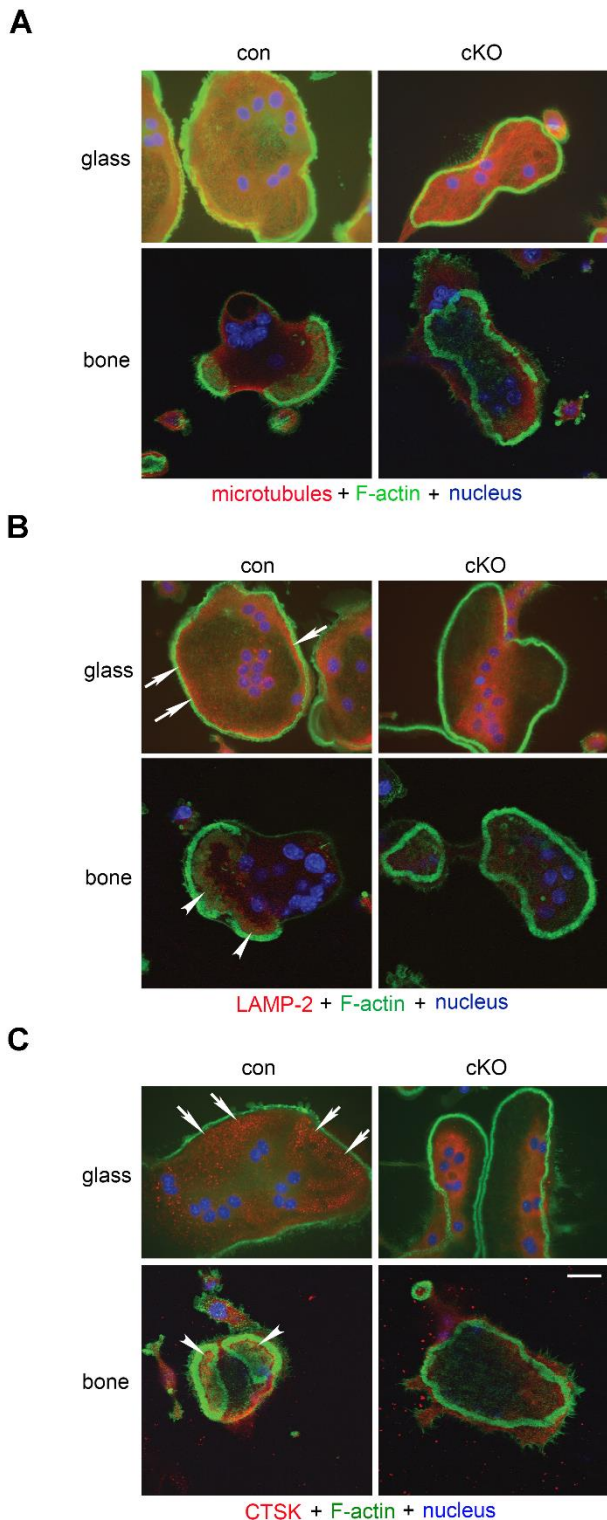

Figure 9. Deletion of *Plekhm1* in osteoclasts by *Ctsk*-Cre inhibits lysosome peripheral distribution but not cytoskeleton organization. (A) Immunofluorescent staining of filamentous actin (F-actin), microtubules, and nucleus in osteoclasts cultured on glass coverslips (upper panels) and bone slices (lower panels). (B) Immunofluorescent staining of F-actin, LAMP-2, and nucleus in osteoclasts cultured on glass coverslips (upper panels) and bone slices (lower panels). White arrows in upper panels point out the distribution of LAMP-2 positive lysosomes at the periphery of control osteoclasts cultured on glass coverslips. White arrow heads in the lower panels point out the localization of LAMP-2 at the ruffled border of control osteoclasts cultured on bone slices. (C) Immunofluorescent staining of F-actin, CTSK (cathepsin K), and nucleus in osteoclasts cultured on glass coverslips (upper panels) and bone slices (lower panels). White arrows in upper panels point out the spreading distribution of CTSK in wild type osteoclasts cultured on glass coverslips. White arrow heads in the lower panels point out the secretion of CTSK in the resorption lacuna of control osteoclasts cultured on bone slices. Representative images are from 6 samples/group/culture of three independent cultures from different mice. Scale bar = 20 $\mu$ m.

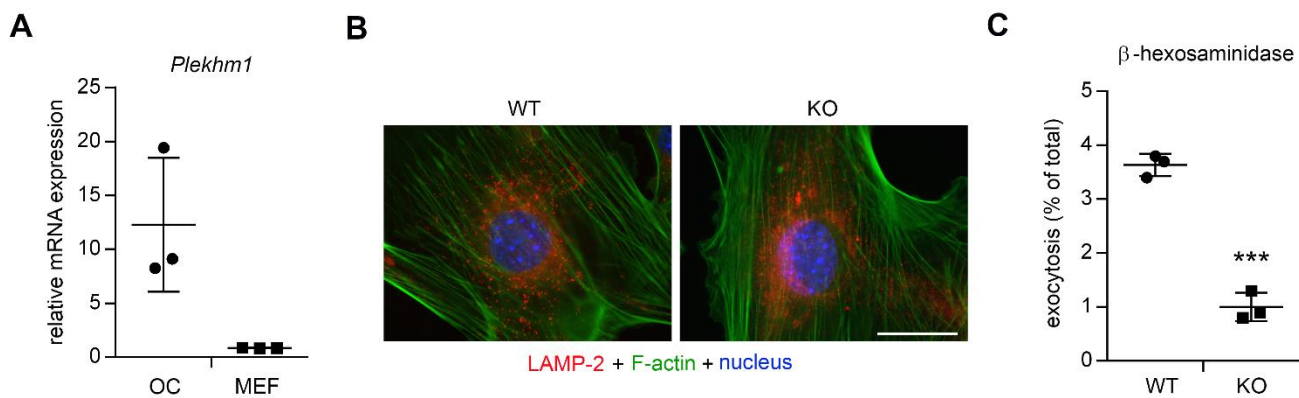

Figure 10. Loss of PLEKHM1 inhibits lysosome exocytosis in mouse embryonic fibroblasts. (A) mRNA level of *Plekhh1* in osteoclasts (OC) and mouse embryonic fibroblasts (MEF) detected by qPCR. (n = 3). (B) Immunofluorescent staining of LAMP-2 in MEFs. Scale bar = 10  $\mu$ m. (C) regulated exocytosis of lysosomes, as assayed by the release of beta-hexosaminidase in streptolysin-O permeabilized MEFs. (n = 3). The data in (A) and (C) are presented as scatter dot plots. The mean and standard deviation of each group are overlaid onto each column of dots. \*\*\* p < 0.001 versus WT by Student t-test. The experiments was repeated three times.



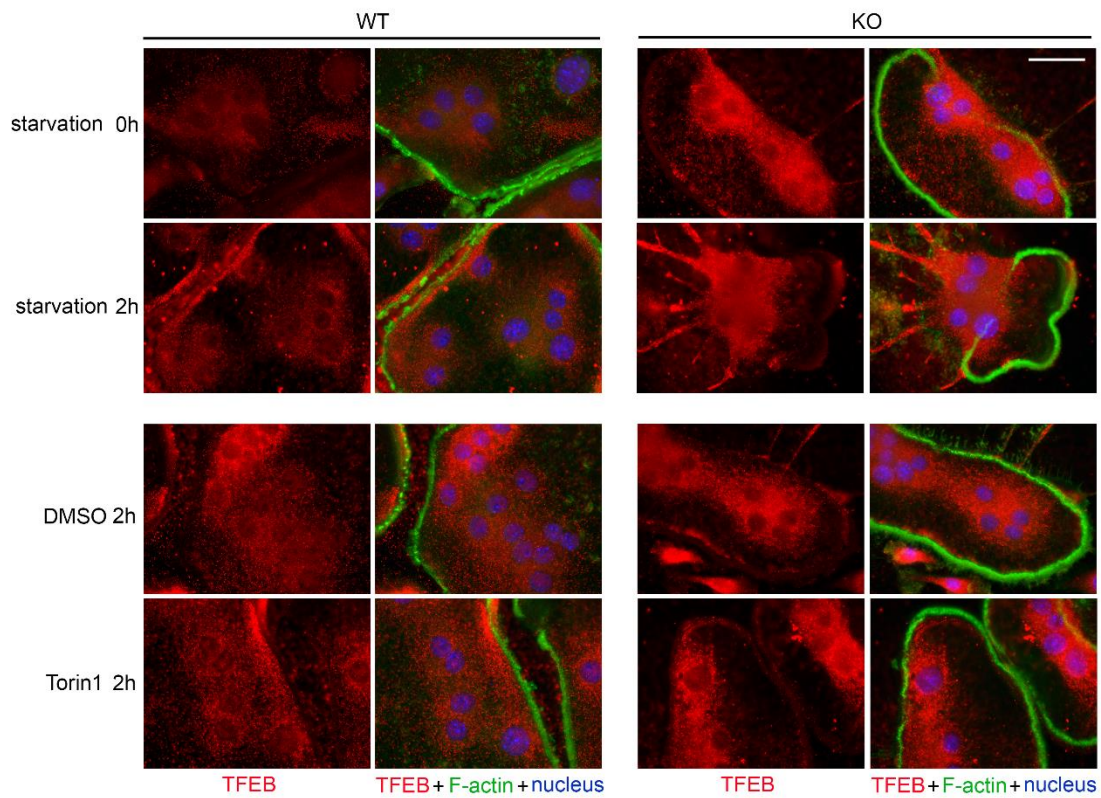

Figure 11. Starvation and treatment of mTOR inhibitor Torin1 in mature osteoclasts do not induce dramatic nuclear translocation of TFEB. Wild type and *Plekhm1*<sup>-/-</sup> mature osteoclasts cultured on glass coverslips were under serum and amino acid starvation in HBSS buffer for 2 hours or treated with either DMSO or 250nM Torin1 for 2 hours. The distribution of TFEB was examined by immunofluorescence using a goat anti-TFEB antibody (Thermo-Fisher Scientific). Scale bar = 20μm. The experiment was repeated twice.

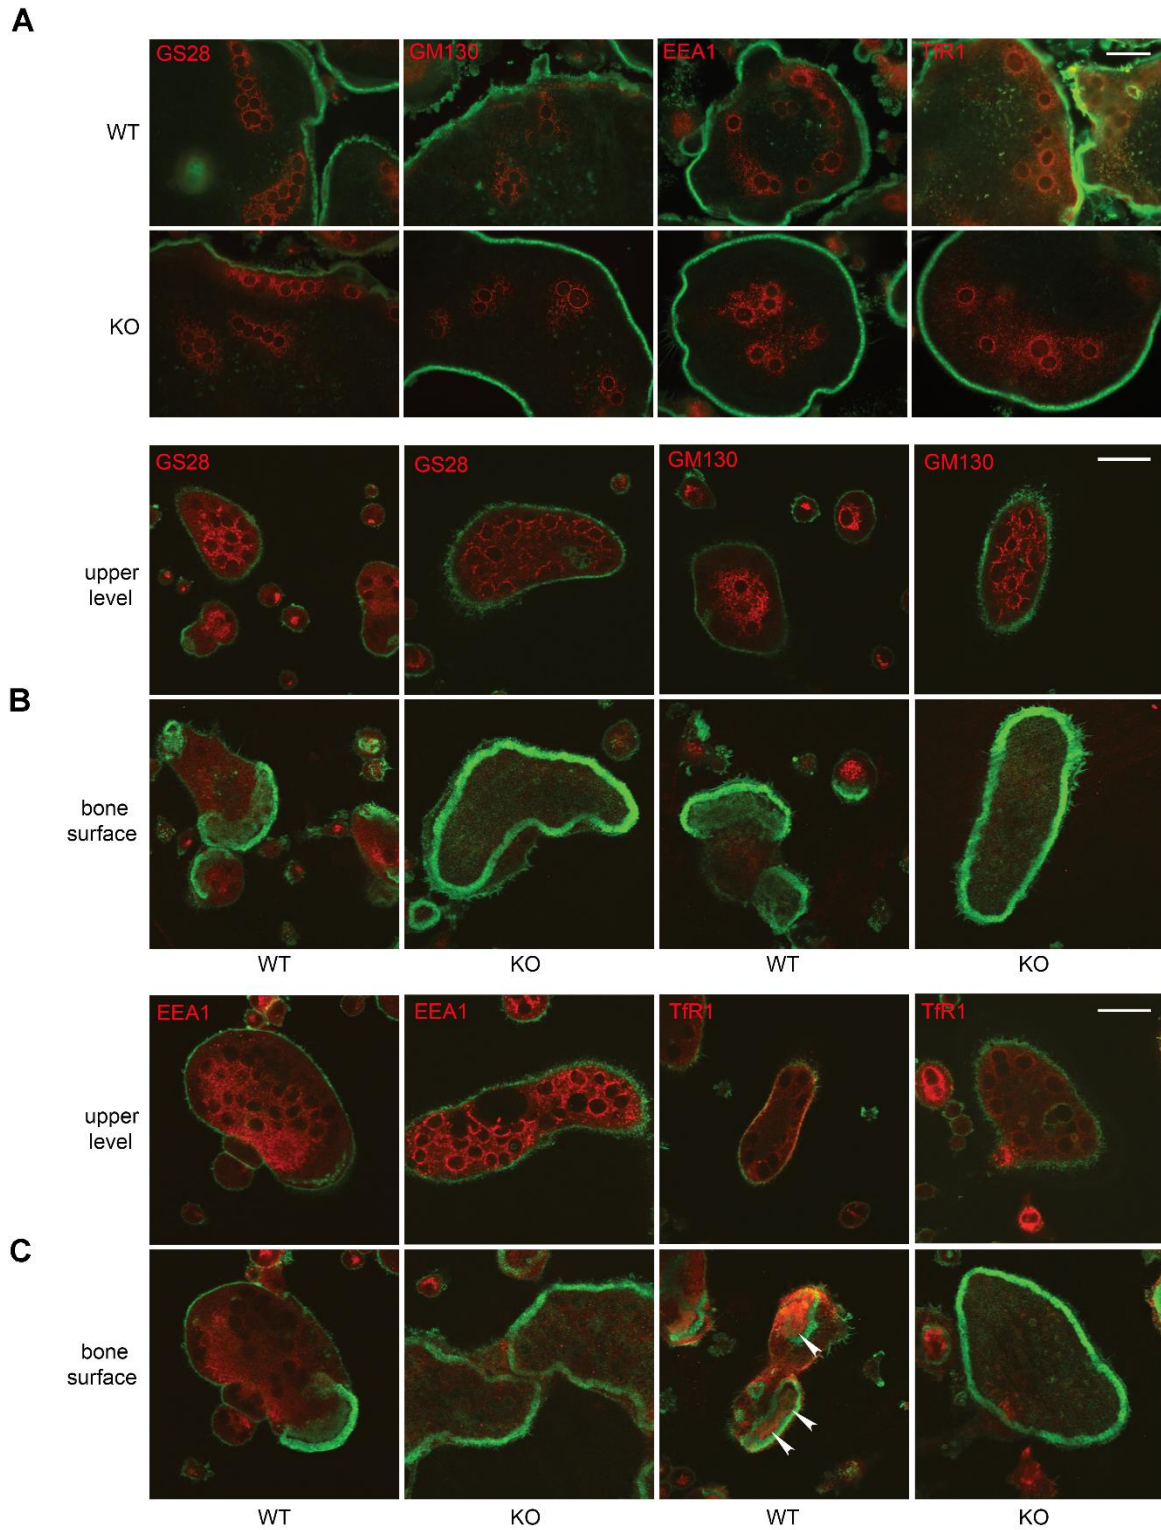

Figure 12. The distribution of Golgi apparatus, early endosomes, and recycling endosomes is not affected by loss of *Plekhl1* in osteoclasts. (A) Immunofluorescent staining of Golgi markers (GS28 and GM130), early endosome marker (EEA1), and recycling endosome marker (transferrin receptor, TfR1) in wild type (WT) and *Plekhl1*<sup>-/-</sup> (KO) osteoclasts cultured on glass coverslips. Scale bar = 20µm. (B) immunofluorescent staining of GS28 and GM130 in osteoclasts cultured on bone slices. Scale bar = 20µm. (C) immunofluorescent staining of EEA1 and endocytosed human holo-transferrin in osteoclasts cultured on bone slices. White arrow heads point out the accumulation of transferrin in the resorption lacuna. Scale bar = 20µm.

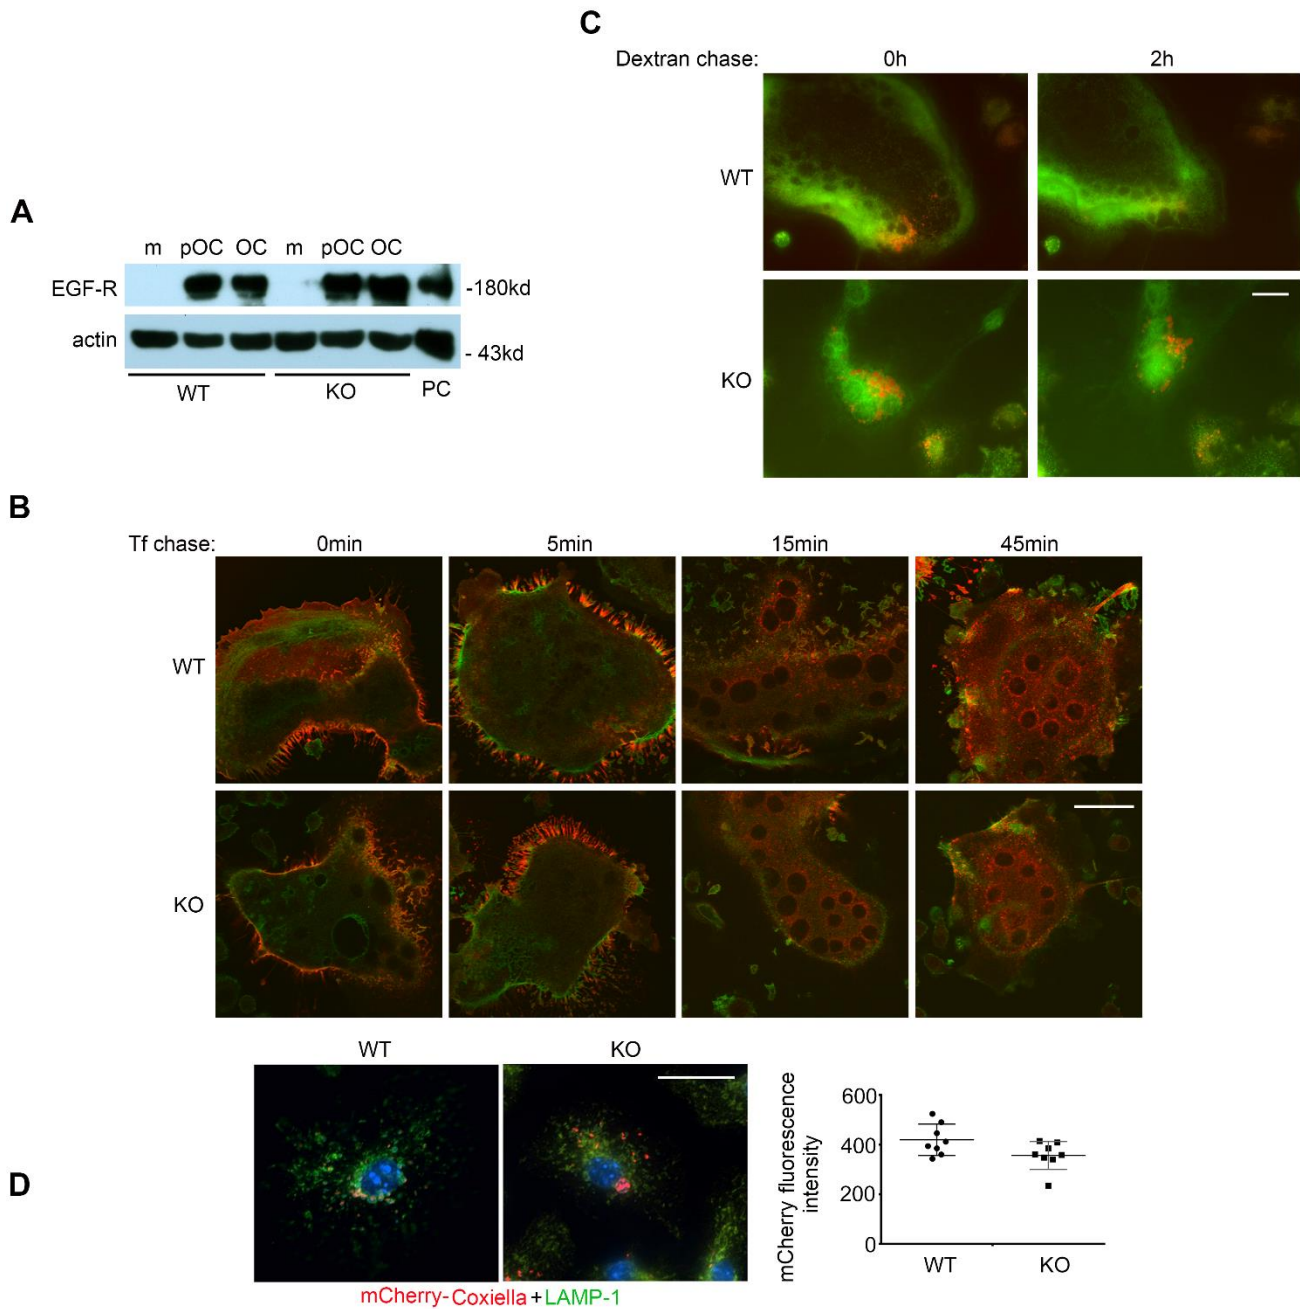

Figure 13. Loss of *Plekhm1* has no effects on EGF receptor (EGF-R) expression and endocytosis/phagocytosis in osteoclasts. (A) Western blot detection of EGF-R protein expression during osteoclast differentiation in wild type (WT) and *Plekhm1*-deficient (KO) cultures. m, bone marrow monocytes; pOC, pre-osteoclasts; OC, mature osteoclasts; PC, positive control. (B) Pulse-chase of human holo-transferrin, a receptor-mediated endocytosis marker, in osteoclasts cultured on glass coverslips. Scale bar = 20µm. (C) Pulse-chase of Alexa fluor 568 labeled Dextran (molecular weight 10,000MW, Thermo-Fisher Scientific), a fluid-phase endocytosis marker, in LAMP-2-GFP expressing osteoclasts. Scale bar = 20µm. (D) Immunofluorescent staining and quantification of phagocytosed mCherry-labeled Coxiella and LAMP-1 in macrophages. Scale bar = 20µm. The right panel represents scatter dot plots (n = 8) of 3 different cultures. The mean and standard deviation of each group are overlaid onto each column of dots.







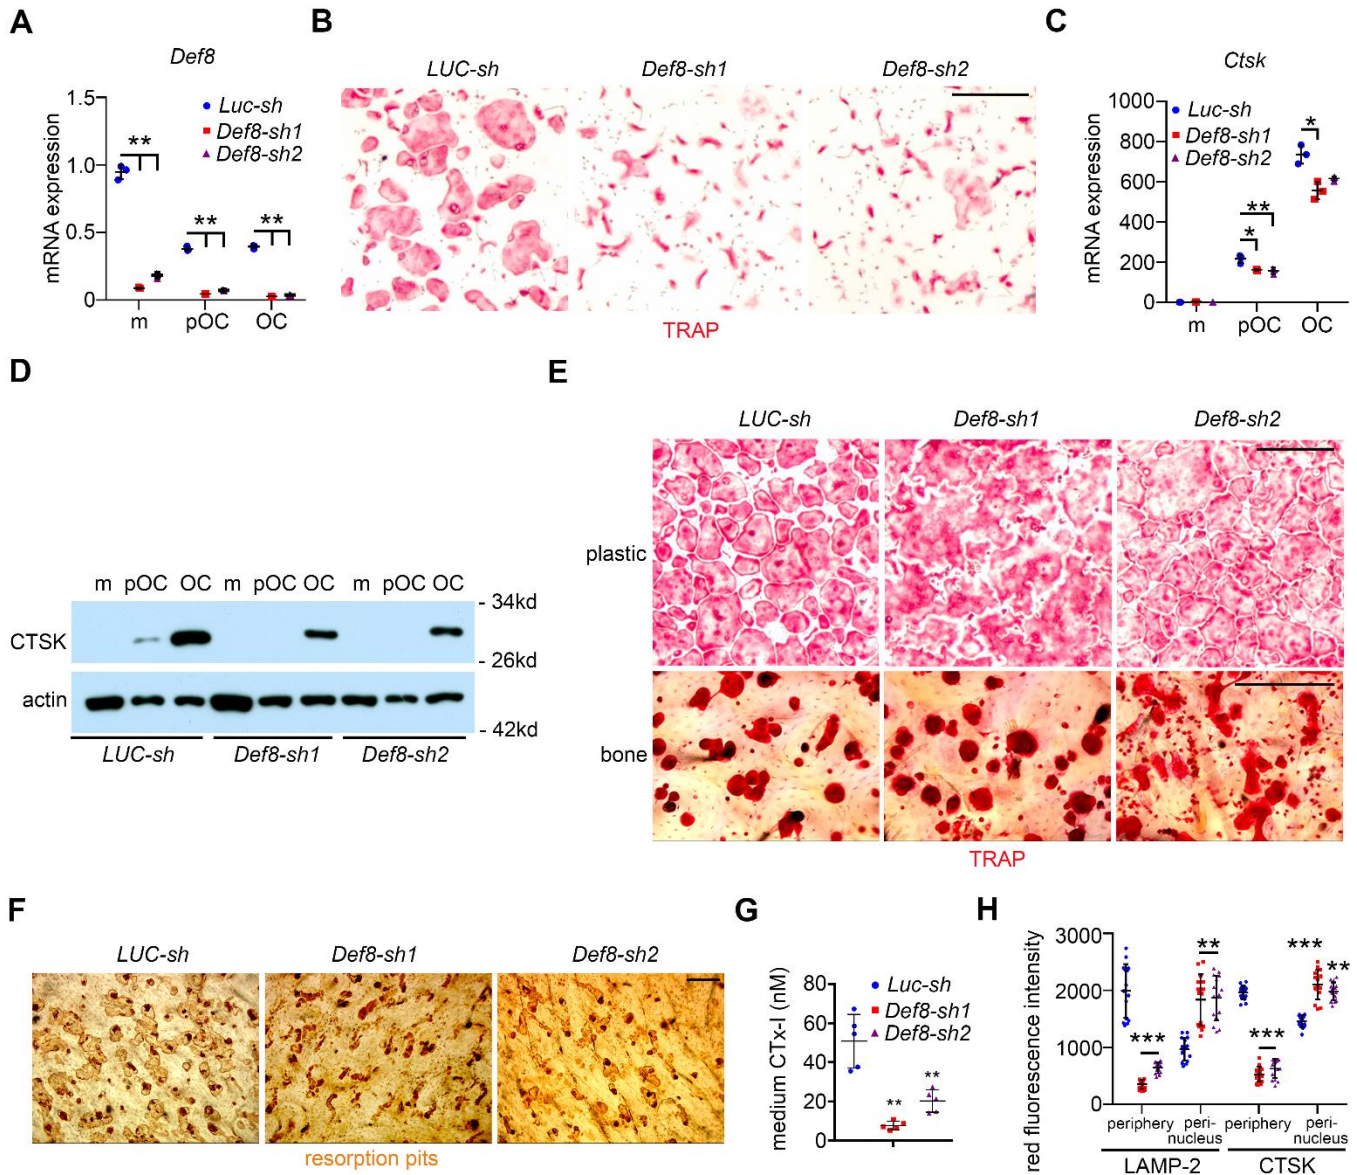

Figure 15. Loss of *Def8* mRNA expression in bone marrow monocytes in vitro inhibits osteoclast formation, lysosome peripheral distribution, and bone resorption. (A) qPCR detection of *Def8* mRNA levels in control (*LUC-sh*) and *Def8* shRNA (*Def8-sh1* and *Def8-sh2*) expressing bone marrow monocytes (m), pre-osteoclasts (pOC), and mature osteoclasts (OC) (n = 3). \*\* p < 0.01 versus *LUC-sh* by one-way ANOVA. (B) TRAP staining of control and *Def8* knocking-down osteoclasts (at the density of  $1.5 \times 10^4$  monocytes/well of a 48-well culture plate). Scale bar = 200  $\mu$ m. Representative images are from 6 samples/group/culture of three independent cultures. (C) qPCR detection of cathepsin K (*Ctsk*) mRNA expression in control and *Def8* knocking-down osteoclast lineage cells (n = 3). \* p < 0.05, \*\* p < 0.01 versus *LUC-sh* by one-way ANOVA. (D) CTSK protein expression in control and *Def8* knocking-down osteoclast lineage cells detected by western blots. Actin served as a loading control. (E) TRAP staining of control and *Def8* knocking-down osteoclasts cultured on plastic culture dishes (upper panels) or cortical bovine bone slices (lower panels) with increasing cell density ( $4.5 \times 10^4$  monocytes/well of a 48-well culture plate). Scale bars = 200  $\mu$ m. (F) Resorption pit staining of osteoclasts cultured in (E). Scale bar = 40  $\mu$ m. (G) medium CTx-I level of cultures in (E) measured by ELISA (n = 5). \*\* p < 0.01 versus *LUC-sh* by one-way ANOVA. (H) Quantifications of lysosome distribution at the cell periphery and the peri-nuclear regions in immunofluorescence-stained LAMP-2 and CTSK in control and *Def8*-knocking-down osteoclasts (n = 15) cultured on glass coverslips using Zen 2.0 Blue Profile View software (Zeiss). See figure legend of the supplemental Figure 8B-8C for the detailed methodology. \*\* p < 0.01, and \*\*\* p < 0.001 versus *LUC-sh* expressing osteoclasts by one-way ANOVA. Data in (A), (C), (G), and (H) are presented as scatter dot plots. The mean and standard deviation of each group are overlaid onto each column of dots.

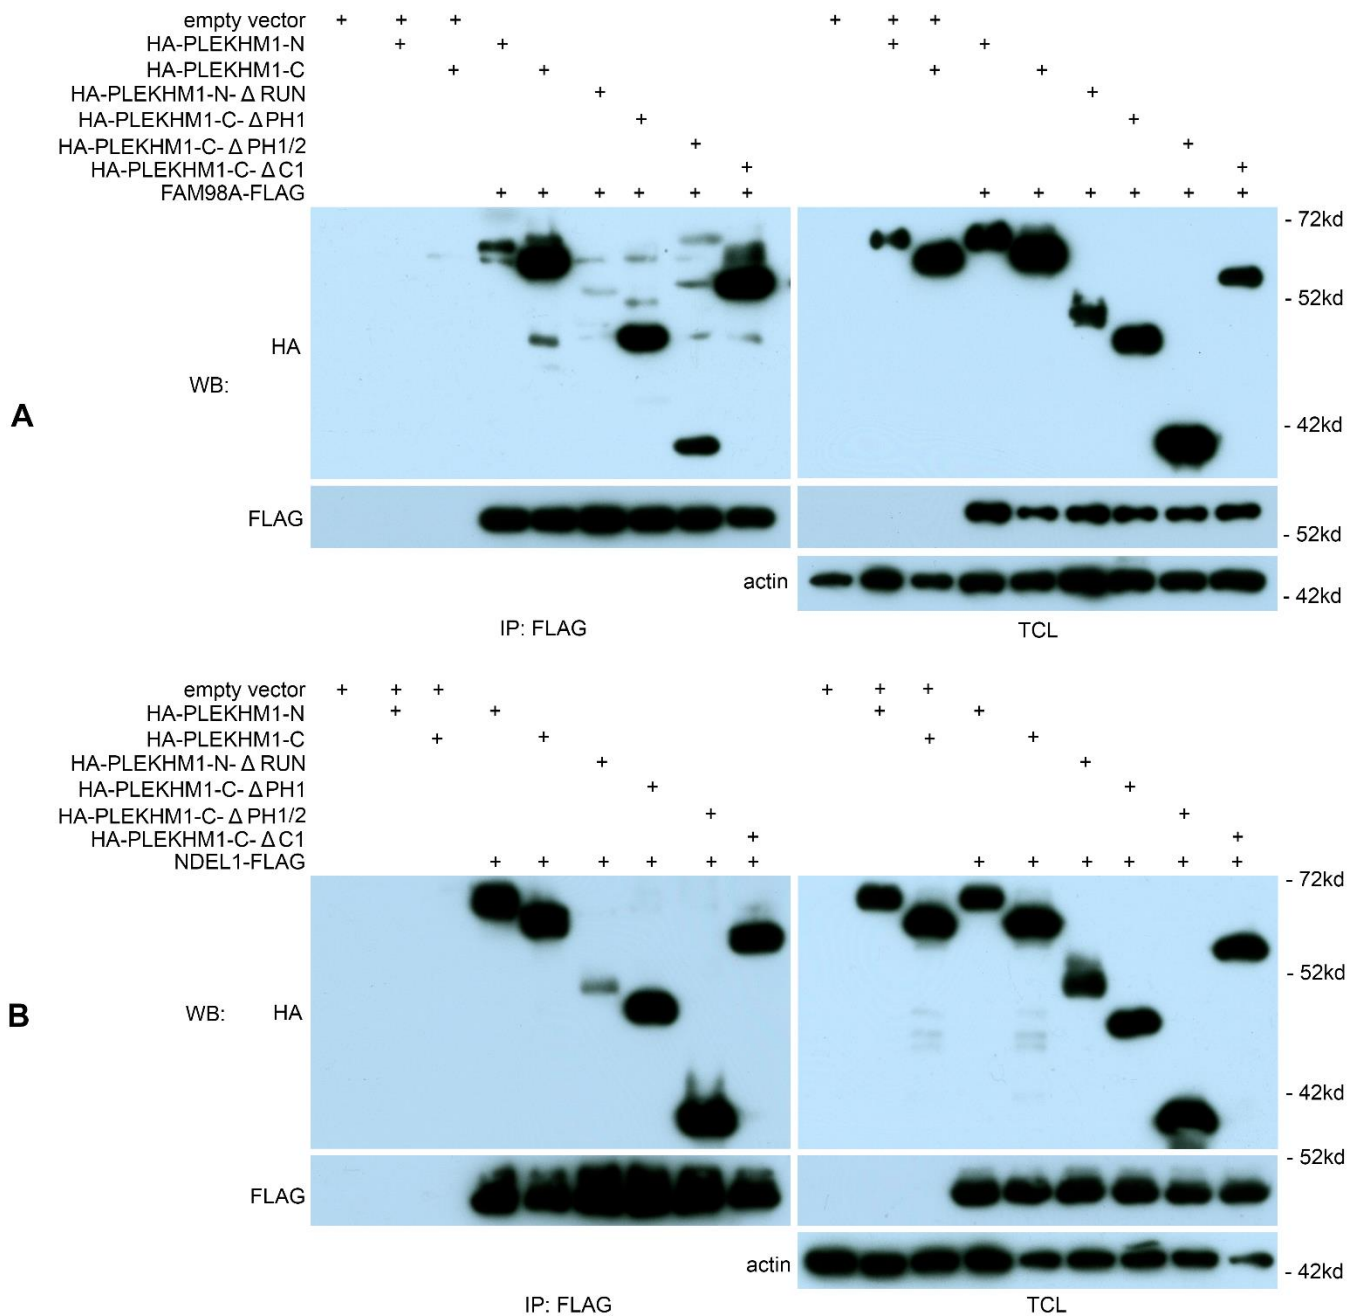

Figure 16. Interactions of FAM98A and NDEL1 with a series of PLEKHM1 fragments. Co-immunoprecipitations (IP) of FLAG tagged FAM98A (A) and NDEL1 (B) with a series of HA tagged PLEKHM1 fragments in 293-T cells. The lysates of 293-T cells expressing the empty vector alone (lane 1) or empty vector + HA-PLEKHM-N (lane 2), or empty vector + HA-PLEKHM1-C (lane 3) served as negative controls. Actin, served as loading controls. TCL, total cell lysate. The experiments were repeated three times

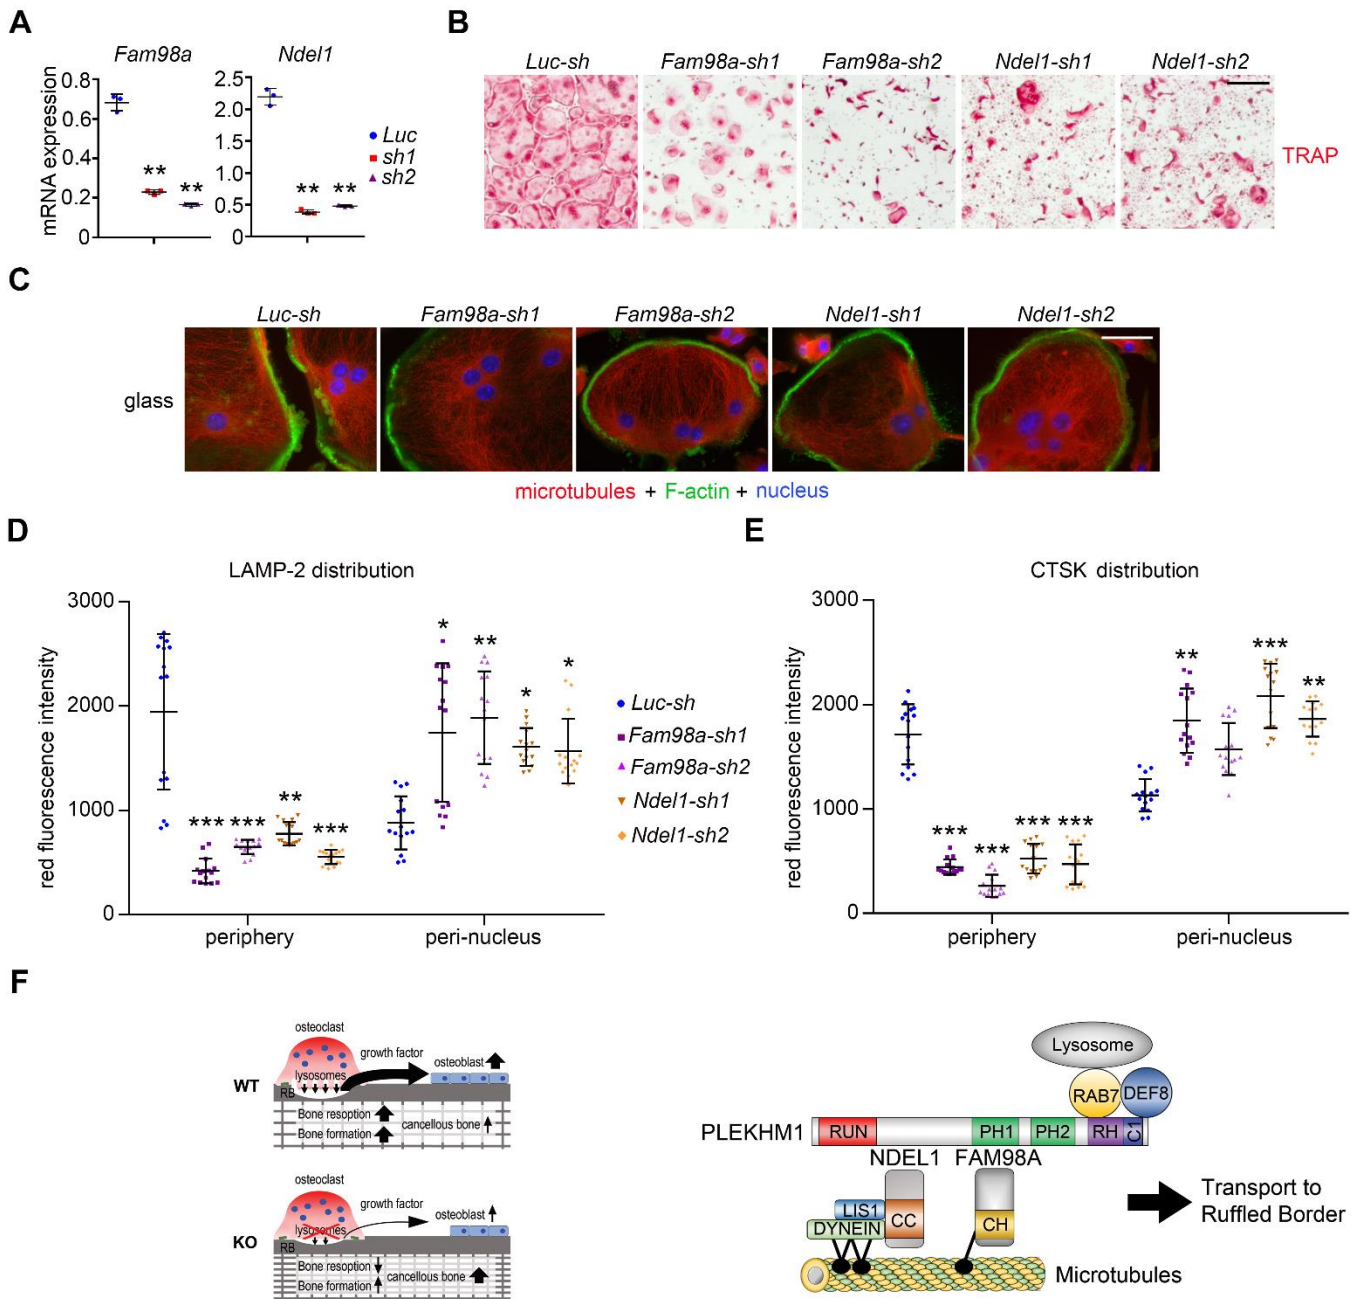

Figure 17. Depletion of *Fam98a* and *Ndel1* mRNA expression in bone marrow monocytes in vitro inhibits osteoclast formation and lysosome peripheral distribution but not cytoskeleton organization. (A) qPCR detection of *Fam98a* and *Ndel1* mRNA levels in control (*LUC-sh*) and two specific shRNAs (*sh1* and *sh2*) expressing osteoclasts (n = 3). \*\* p < 0.01 versus *LUC-sh* by one-way ANOVA. (B) TRAP staining of control and *Fam98a*-, *Ndel1*-knocking-down osteoclasts cultured on plastic. Scale bar = 200µm. (C) Immunofluorescent staining of microtubules, filamentous actin (F-actin), and the nucleus in control, and *Fam98a*-, *Ndel1*-knocking-down osteoclasts cultured on glass coverslips. Scale bar = 20 µm. (D) and (E) Quantifications of lysosome distribution at the cell periphery and the peri-nuclear regions in immunofluorescence-stained LAMP-2 and cathepsin K (CTSK) in control and *Fam98a*-, *Ndel1*-knocking-down osteoclasts (n = 15) cultured on glass coverslips using Zen 2.0 Blue Profile View software (Zeiss). See figure legend of the supplemental Figure 8B-8C for the detailed methodology. \* p < 0.05, \*\* p < 0.01, and \*\*\* p < 0.001 versus *LUC-sh* expressing osteoclasts by one-way ANOVA. Data in (A), (D), and (E) are presented as scatter dot plots. The mean and standard deviation of each group are overlaid onto each column of dots. (F) in vivo and in vitro working models of this study.



## Supplemental Tables in word document file

**Table 1:  $\mu$ CT analysis of L4 spine**

| Mouse strain | age         | sex    | genotype   | bone parameters    |                               |                    |                                  |
|--------------|-------------|--------|------------|--------------------|-------------------------------|--------------------|----------------------------------|
|              |             |        |            | BV/TV (%)          | Tb. N (/mm)                   | Tb. Th ( $\mu$ m)  | Tb. Sp ( $\mu$ m)                |
| germline     | 2-month-old | Male   | WT (n=17)  | 29.17 $\pm$ 3.15   | 5.66 $\pm$ 0.23               | 51.71 $\pm$ 3.28   | 165.49 $\pm$ 8.57                |
|              |             |        | KO (n=17)  | 40.45 $\pm$ 4.78** | 7.57 $\pm$ 0.50**             | 55.44 $\pm$ 3.64** | 119.79 $\pm$ 10.44**             |
|              |             | Female | WT (n=11)  | 27.35 $\pm$ 1.91   | 5.19 $\pm$ 0.24               | 51.55 $\pm$ 1.64   | 183.25 $\pm$ 9.56                |
|              |             |        | KO (n=15)  | 36.71 $\pm$ 2.23** | 6.48 $\pm$ 0.24**             | 55.79 $\pm$ 2.17** | 142.10 $\pm$ 7.03**              |
|              | 5-month-old | Male   | WT (n=11)  | 26.79 $\pm$ 1.81   | 5.21 $\pm$ 0.18               | 50.80 $\pm$ 1.72   | 180.03 $\pm$ 7.51                |
|              |             |        | KO (n=10)  | 41.35 $\pm$ 3.07** | 6.99 $\pm$ 0.36**             | 57.03 $\pm$ 2.32** | 125.89 $\pm$ 8.50**              |
|              | 6-month-old | Female | WT (n=9)   | 23.76 $\pm$ 1.94   | 4.16 $\pm$ 0.21               | 53.09 $\pm$ 2.17   | 232.42 $\pm$ 12.75               |
|              |             |        | KO (n=9)   | 38.60 $\pm$ 5.60** | 5.74 $\pm$ 0.59**             | 60.29 $\pm$ 3.64** | 161.21 $\pm$ 20.43**             |
| conditional  | 2-month-old | Male   | con (n=15) | 30.20 $\pm$ 2.46   | 5.97 $\pm$ 0.20               | 50.81 $\pm$ 2.31   | 155.26 $\pm$ 6.78                |
|              |             |        | cKO (n=12) | 39.37 $\pm$ 3.75** | 7.63 $\pm$ 0.27**             | 53.92 $\pm$ 3.95   | 116.37 $\pm$ 4.79**              |
|              |             | Female | con (n=14) | 27.20 $\pm$ 1.87   | 5.50 $\pm$ 0.28               | 49.32 $\pm$ 1.84   | 172.83 $\pm$ 10.40               |
|              |             |        | cKO (n=14) | 37.63 $\pm$ 2.04** | 6.94 $\pm$ 0.31**             | 53.07 $\pm$ 1.91** | 130.39 $\pm$ 6.98**              |
|              | 5-month-old | Male   | con (n=10) | 28.53 $\pm$ 3.18   | 5.26 $\pm$ 0.38               | 51.18 $\pm$ 2.90   | 177.13 $\pm$ 18.27               |
|              |             |        | cKO (n=11) | 40.34 $\pm$ 3.10** | 6.98 $\pm$ 0.26**             | 54.66 $\pm$ 2.28** | 124.58 $\pm$ 5.97**              |
|              | 6-month-old | Female | con (n=8)  | 27.43 $\pm$ 4.29   | 4.37 $\pm$ 0.44               | 55.23 $\pm$ 3.25   | 222.00 $\pm$ 24.26               |
|              |             |        | con (n=6)  | 37.17 $\pm$ 5.65** | 5.66 $\pm$ 0.61 <sup>##</sup> | 58.90 $\pm$ 3.50   | 162.87 $\pm$ 19.82 <sup>##</sup> |

BV/TV, percentage of trabecular bone volume to tissue volume; Tb. N, trabecular number; Tb. Th, trabecular thickness; Tb.Sp, trabecular separation. \*\*:p<0.01 by Student t-test (KO vs WT, Plekhm1; cKO vs con). <sup>##</sup>:p<0.01 by Mann-Whitney U statistic test (cKO vs con)

**Table 2:  $\mu$ CT analysis of cortical thickness in femur**

| Mouse strain | age         | sex        | genotype      | Cortical Thickness (mm) |
|--------------|-------------|------------|---------------|-------------------------|
| germline     | 2-month-old | Male       | WT (n=17)     | 0.19±0.012              |
|              |             |            | KO (n=17)     | 0.18±0.013              |
|              | Female      | WT (n=11)  | 0.18±0.0058   |                         |
|              |             | KO (n=15)  | 0.17±0.0063** |                         |
|              | 5-month-old | Male       | WT (n=11)     | 0.22±0.0048             |
|              |             |            | KO (n=10)     | 0.21±0.0067             |
| 6-month-old  | Female      | WT (n=9)   | 0.22±0.069    |                         |
|              |             | KO (n=9)   | 0.22±0.075    |                         |
| conditional  | 2-month-old | Male       | con (n=15)    | 0.19±0.0080             |
|              |             |            | cKO (n=12)    | 0.18±0.017              |
|              | Female      | con (n=14) | 0.17±0.0066   |                         |
|              |             | cKO (n=14) | 0.17±0.0074   |                         |
|              | 5-month-old | Male       | con (n=10)    | 0.22±0.0062             |
|              |             |            | cKO (n=11)    | 0.21±0.015*             |
| 6-month-old  | Female      | con (n=8)  | 0.23±0.013    |                         |
|              |             | cKO (n=6)  | 0.22±0.012    |                         |

\*:p<0.05, \*\*:p<0.01 by student t-test (KO vs WT, cKO vs con)

**Table 3: Histomorphometry of the distal femur in 2-month-old male mice**

| Parameters     | Plekhm1;Hprt  |                  | Plekhm1;Ctsk   |                 |
|----------------|---------------|------------------|----------------|-----------------|
|                | WT<br>(n=13)  | KO<br>(n=13)     | con<br>(n=15)  | cKO<br>(n=12)   |
| BV/TV<br>(%)   | 9.65±2.23     | 18.75±5.57**     | 11.96±2.24     | 21.72±5.13**    |
| Tb. N<br>(/mm) | 2.91±0.39     | 5.05±0.75**      | 3.43±0.50      | 5.71±0.93**     |
| Tb. Th<br>(µm) | 33.11±6.25    | 36.59±5.08       | 34.87±4.23     | 37.79±5.48      |
| Tb. Sp<br>(µm) | 316.98±53.43  | 165.10±30.44**   | 262.31±41.38   | 141.82±33.40**  |
| OV/BV<br>(%)   | 3.25±1.53     | 1.66±0.66**      | 2.79±0.71      | 1.35±0.40**     |
| O. Th<br>(µm)  | 2.81±0.30     | 2.74±0.31        | 2.95±0.33      | 3.05±0.30       |
| Ot. N/B. Ar    | 1096.86±83.09 | 1268.14±123.00** | 1057.50±108.81 | 1155.57±111.25* |

BV/TV, percentage of trabecular bone volume to tissue volume; Tb. N, trabecular number; Tb. Th, trabecular thickness; Tb.Sp, trabecular separation; OV/BV, percentage of osteoid volume to bone volume; O.Th, osteoid thickness; Ot.N/B.Ar, osteocyte number/ bone area. \*:p<0.05, \*\*:p<0.01 student t-test (Plekhm1;Hprt: vs WT, Plekhm1;Ctsk: vs con)

**Table 4. PLEKHM1-interacting proteins identified by mass-spectrometry in osteoclasts.**

| Protein                                                                                                 | Accession Number | Molecular Weight | Fold Change | vector spectra | PLEKHM1 spectra |
|---------------------------------------------------------------------------------------------------------|------------------|------------------|-------------|----------------|-----------------|
| <b>Pleckstrin homology domain-containing family M member 1</b> OS=Mus musculus GN=Plekhm1 PE=2 SV=1     | PKHM1_MOUSE      | 119 kDa          | INF         | 0              | 562             |
| <b>Differentially expressed in FDCP 8</b> OS=Mus musculus GN=Def8 PE=2 SV=1                             | DEFI8_MOUSE      | 52 kDa           | INF         | 0              | 40              |
| <b>Keratin, type I cytoskeletal 40</b> OS=Mus musculus GN=Krt40 PE=2 SV=1                               | K1C40_MOUSE      | 49 kDa           | INF         | 0              | 22              |
| <b>NADH dehydrogenase [ubiquinone] 1 alpha subcomplex subunit 8</b> OS=Mus musculus GN=Ndufa8 PE=1 SV=3 | NDUA8_MOUSE      | 20 kDa           | INF         | 0              | 9               |
| <b>40S ribosomal protein S9</b> OS=Mus musculus GN=Rps9 PE=2 SV=3                                       | RS9_MOUSE        | 23 kDa           | INF         | 0              | 9               |
| <b>Eukaryotic translation initiation factor 3 subunit K</b> OS=Mus musculus GN=Eif3k PE=1 SV=1          | EIF3K_MOUSE      | 25 kDa           | INF         | 0              | 9               |
| <b>Desmoglein-1-alpha</b> OS=Mus musculus GN=Dsg1a PE=2 SV=2                                            | DSG1A_MOUSE (+1) | 115 kDa          | INF         | 0              | 9               |
| <b>Protein FAM98A</b> OS=Mus musculus GN=Fam98a PE=2 SV=1                                               | FA98A_MOUSE      | 55 kDa           | INF         | 0              | 9               |
| <b>Non-histone chromosomal protein HMG-17</b> OS=Mus musculus GN=Hmgn2 PE=1 SV=2                        | HMGN2_MOUSE      | 9 kDa            | INF         | 0              | 8               |
| <b>Mitogen-activated protein kinase kinase kinase 7</b> OS=Mus musculus GN=Map3k7 PE=1 SV=1             | M3K7_MOUSE       | 64 kDa           | INF         | 0              | 8               |
| <b>60S ribosomal protein L6</b> OS=Mus musculus GN=Rpl6 PE=1 SV=3                                       | RL6_MOUSE        | 34 kDa           | INF         | 0              | 7               |
| <b>Protein FAM195A</b> OS=Mus musculus GN=Fam195a PE=1 SV=1                                             | F195A_MOUSE      | 18 kDa           | INF         | 0              | 7               |
| <b>Ubiquitin carboxyl-terminal hydrolase 10</b> OS=Mus musculus GN=Usp10 PE=1 SV=3                      | UBP10_MOUSE      | 87 kDa           | INF         | 0              | 6               |
| <b>Protein regulator of cytokinesis 1</b> OS=Mus musculus GN=Prc1 PE=2 SV=2                             | PRC1_MOUSE       | 70 kDa           | INF         | 0              | 6               |
| <b>Histone acetyltransferase p300</b> OS=Mus musculus GN=Ep300 PE=1 SV=1                                | EP300_MOUSE      | 264 kDa          | INF         | 0              | 6               |
| <b>Nuclear cap-binding protein subunit 1</b> OS=Mus musculus GN=Ncbp1 PE=1 SV=2                         | NCBP1_MOUSE      | 92 kDa           | INF         | 0              | 6               |
| <b>Vesicle-associated membrane protein-associated protein A</b> OS=Mus musculus GN=Vapa PE=1 SV=2       | VAPA_MOUSE       | 28 kDa           | INF         | 0              | 6               |
| <b>Atherin</b> OS=Mus musculus GN=Samd1 PE=1 SV=1                                                       | SAMD1_MOUSE      | 55 kDa           | INF         | 0              | 6               |
| <b>Nuclear distribution protein nudE-like 1</b> OS=Mus musculus GN=Ndel1 PE=1 SV=2                      | NDEL1_MOUSE      | 38 kDa           | INF         | 0              | 6               |
| <b>Probable ubiquitin carboxyl-terminal hydrolase FAF-X</b> OS=Mus musculus GN=Usp9x PE=1 SV=2          | USP9X_MOUSE      | 291 kDa          | INF         | 0              | 5               |
| <b>Cluster of Cytochrome c, somatic</b> OS=Mus musculus GN=Cycs PE=1 SV=2 (CYC_MOUSE)                   | CYC_MOUSE        | 12 kDa           | INF         | 0              | 5               |
| <b>Zinc finger CCCH domain-containing protein 14</b> OS=Mus musculus GN=Zc3h14 PE=1 SV=1                | ZC3HE_MOUSE      | 82 kDa           | INF         | 0              | 5               |
| <b>Helicase with zinc finger domain 2</b> OS=Mus musculus GN=Helz2 PE=1 SV=1                            | HELZ2_MOUSE      | 332 kDa          | INF         | 0              | 5               |
| <b>RNA-binding protein 47</b> OS=Mus musculus GN=Rbm47 PE=2 SV=1                                        | RBM47_MOUSE      | 64 kDa           | INF         | 0              | 5               |
| <b>Ig kappa chain V-V region MOPC 149</b> OS=Mus musculus PE=1 SV=1                                     | KV5A4_MOUSE      | 12 kDa           | INF         | 0              | 5               |
| <b>DNA dC-&gt;dU-editing enzyme APOBEC-3</b> OS=Mus musculus GN=Apobec3 PE=1 SV=2                       | ABEC3_MOUSE      | 51 kDa           | INF         | 0              | 5               |

|                                                                                                                                      |                   |         |     |   |   |
|--------------------------------------------------------------------------------------------------------------------------------------|-------------------|---------|-----|---|---|
| <b>Plakophilin-1 OS=Mus musculus GN=Pkp1 PE=2 SV=1</b>                                                                               | PKP1_MOUSE        | 81 kDa  | INF | 0 | 5 |
| <b>Leucine-rich repeat-containing protein 7 OS=Mus musculus GN=Lrrc7 PE=1 SV=2</b>                                                   | LRRC7_MOUSE       | 167 kDa | INF | 0 | 5 |
| <b>Four and a half LIM domains protein 3 OS=Mus musculus GN=Fhl3 PE=1 SV=2</b>                                                       | FHL3_MOUSE        | 32 kDa  | INF | 0 | 4 |
| <b>Ras-related protein Rap-1b OS=Mus musculus GN=Rap1b PE=2 SV=2</b>                                                                 | RAP1B_MOUSE       | 21 kDa  | INF | 0 | 4 |
| <b>Eukaryotic translation initiation factor 4E OS=Mus musculus GN=Eif4e PE=1 SV=1</b>                                                | IF4E_MOUSE        | 25 kDa  | INF | 0 | 4 |
| <b>Cation-independent mannose-6-phosphate receptor OS=Mus musculus GN=Igf2r PE=1 SV=1</b>                                            | MPRI_MOUSE        | 274 kDa | INF | 0 | 4 |
| <b>Phosphatidylserine decarboxylase proenzyme OS=Mus musculus GN=Pisd PE=2 SV=1</b>                                                  | PISD_MOUSE        | 46 kDa  | INF | 0 | 4 |
| <b>High affinity immunoglobulin gamma Fc receptor I OS=Mus musculus GN=Fcgr1 PE=1 SV=1</b>                                           | FCGR1_MOUSE       | 45 kDa  | INF | 0 | 4 |
| <b>Serine-rich coiled-coil domain-containing protein 1 OS=Mus musculus GN=Ccser1 PE=2 SV=2</b>                                       | CCSE1_MOUSE       | 98 kDa  | INF | 0 | 4 |
| <b>NADH dehydrogenase [ubiquinone] iron-sulfur protein 5 OS=Mus musculus GN=Ndufs5 PE=1 SV=3</b>                                     | NDUS5_MOUSE       | 13 kDa  | INF | 0 | 4 |
| <b>Protein unc-119 homolog B OS=Mus musculus GN=Unc119b PE=2 SV=1</b>                                                                | U119B_MOUSE       | 28 kDa  | INF | 0 | 4 |
| <b>Zinc finger CCCH-type antiviral protein 1 OS=Mus musculus GN=Zc3hav1 PE=1 SV=1</b>                                                | ZCCHV_MOUSE       | 107 kDa | INF | 0 | 4 |
| <b>Proteasome subunit alpha type-1 OS=Mus musculus GN=Psm1 PE=1 SV=1</b>                                                             | PSA1_MOUSE        | 30 kDa  | INF | 0 | 4 |
| <b>Meiosis arrest female protein 1 OS=Mus musculus GN=Marf1 PE=1 SV=3</b>                                                            | MARF1_MOUSE       | 192 kDa | INF | 0 | 4 |
| <b>39S ribosomal protein L28, mitochondrial OS=Mus musculus GN=Mrpl28 PE=2 SV=3</b>                                                  | RM28_MOUSE        | 30 kDa  | INF | 0 | 4 |
| <b>14-3-3 protein sigma OS=Mus musculus GN=Sfn PE=1 SV=2</b>                                                                         | 1433S_MOUSE       | 28 kDa  | INF | 0 | 4 |
| <b>TAF6-like RNA polymerase II p300/CBP-associated factor-associated factor 65 kDa subunit 6L OS=Mus musculus GN=Taf6l PE=2 SV=1</b> | TAF6L_MOUSE       | 67 kDa  | INF | 0 | 3 |
| <b>Histone H3.1 OS=Mus musculus GN=Hist1h3a PE=1 SV=2</b>                                                                            | H31_MOUSE<br>(+3) | 15 kDa  | INF | 0 | 3 |
| <b>Uncharacterized protein C19orf43 homolog OS=Mus musculus PE=2 SV=1</b>                                                            | CS043_MOUSE       | 18 kDa  | INF | 0 | 3 |
| <b>Eukaryotic translation initiation factor 4E transporter OS=Mus musculus GN=Eif4enif1 PE=1 SV=2</b>                                | 4ET_MOUSE         | 108 kDa | INF | 0 | 3 |
| <b>Charged multivesicular body protein 4b OS=Mus musculus GN=Chmp4b PE=2 SV=2</b>                                                    | CHM4B_MOUSE       | 25 kDa  | INF | 0 | 3 |
| <b>Translation machinery-associated protein 7 OS=Mus musculus GN=Tma7 PE=2 SV=1</b>                                                  | TMA7_MOUSE        | 7 kDa   | INF | 0 | 3 |
| <b>Signal recognition particle 14 kDa protein OS=Mus musculus GN=Srp14 PE=1 SV=1</b>                                                 | SRP14_MOUSE       | 13 kDa  | INF | 0 | 3 |
| <b>Double-stranded RNA-binding protein Staufen homolog 1 OS=Mus musculus GN=Stau1 PE=2 SV=1</b>                                      | STAU1_MOUSE       | 54 kDa  | INF | 0 | 3 |
| <b>CDKN2AIP N-terminal-like protein OS=Mus musculus GN=Cdkn2aipnl PE=2 SV=1</b>                                                      | C2AIL_MOUSE       | 13 kDa  | INF | 0 | 3 |
| <b>PCNA-associated factor OS=Mus musculus GN=Paf PE=2 SV=1</b>                                                                       | PAF15_MOUSE       | 12 kDa  | INF | 0 | 3 |
| <b>39S ribosomal protein L13, mitochondrial OS=Mus musculus GN=Mrpl13 PE=2 SV=1</b>                                                  | RM13_MOUSE        | 21 kDa  | INF | 0 | 3 |



|                                                                                                                                      |             |         |     |   |   |
|--------------------------------------------------------------------------------------------------------------------------------------|-------------|---------|-----|---|---|
| <b>Chromobox protein homolog 3 OS=Mus musculus<br/>GN=Cbx3 PE=1 SV=2</b>                                                             | CBX3_MOUSE  | 21 kDa  | INF | 0 | 3 |
| <b>CDP-diacylglycerol--inositol 3-phosphatidyltransferase<br/>OS=Mus musculus GN=Cdipt PE=1 SV=1</b>                                 | CDIPT_MOUSE | 24 kDa  | INF | 0 | 3 |
| <b>Small nuclear ribonucleoprotein Sm D2 OS=Mus<br/>musculus GN=Snrpd2 PE=1 SV=1</b>                                                 | SMD2_MOUSE  | 14 kDa  | INF | 0 | 3 |
| <b>XIAP-associated factor 1 OS=Mus musculus GN=Xaf1<br/>PE=2 SV=3</b>                                                                | XAF1_MOUSE  | 31 kDa  | INF | 0 | 3 |
| <b>Mitochondrial fission regulator 1-like OS=Mus musculus<br/>GN=Mtfr1l PE=1 SV=1</b>                                                | MFR1L_MOUSE | 32 kDa  | INF | 0 | 3 |
| <b>60S ribosomal protein L37 OS=Mus musculus<br/>GN=Rpl37 PE=2 SV=3</b>                                                              | RL37_MOUSE  | 11 kDa  | INF | 0 | 3 |
| <b>Transcription factor Sp1 OS=Mus musculus GN=Sp1<br/>PE=1 SV=2</b>                                                                 | SP1_MOUSE   | 81 kDa  | INF | 0 | 3 |
| <b>Trinucleotide repeat-containing gene 6A protein<br/>OS=Mus musculus GN=Tnrc6a PE=2 SV=1</b>                                       | TNR6A_MOUSE | 203 kDa | INF | 0 | 3 |
| <b>DnaJ homolog subfamily C member 15 OS=Mus<br/>musculus GN=Dnajc15 PE=1 SV=1</b>                                                   | DJC15_MOUSE | 16 kDa  | INF | 0 | 3 |
| <b>Vesicle-associated membrane protein 8 OS=Mus<br/>musculus GN=Vamp8 PE=1 SV=1</b>                                                  | VAMP8_MOUSE | 11 kDa  | INF | 0 | 3 |
| <b>Mitochondrial import inner membrane translocase<br/>subunit TIM14 OS=Mus musculus GN=Dnajc19 PE=2<br/>SV=3</b>                    | TIM14_MOUSE | 12 kDa  | INF | 0 | 3 |
| <b>Cluster of Microtubule-associated serine/threonine-<br/>protein kinase 3 OS=Mus musculus GN=Mast3 PE=1<br/>SV=3 (MAST3_MOUSE)</b> | MAST3_MOUSE | 144 kDa | INF | 0 | 3 |
| <b>Microtubule-associated serine/threonine-protein kinase 2<br/>OS=Mus musculus GN=Mast2 PE=1 SV=1</b>                               | MAST2_MOUSE | 191 kDa | INF | 0 | 3 |
| <b>Rho-related GTP-binding protein RhoG OS=Mus<br/>musculus GN=Rhog PE=2 SV=1</b>                                                    | RHOG_MOUSE  | 21 kDa  | INF | 0 | 3 |
| <b>C-C motif chemokine 9 OS=Mus musculus GN=Ccl9<br/>PE=1 SV=1</b>                                                                   | CCL9_MOUSE  | 14 kDa  | INF | 0 | 2 |
| <b>28S ribosomal protein S16, mitochondrial OS=Mus<br/>musculus GN=Mrps16 PE=2 SV=1</b>                                              | RT16_MOUSE  | 15 kDa  | INF | 0 | 2 |
| <b>Exocyst complex component 4 OS=Mus musculus<br/>GN=Exoc4 PE=1 SV=2</b>                                                            | EXOC4_MOUSE | 111 kDa | INF | 0 | 2 |
| <b>NADH dehydrogenase [ubiquinone] 1 alpha subcomplex<br/>subunit 6 OS=Mus musculus GN=Ndufa6 PE=1 SV=1</b>                          | NDUA6_MOUSE | 15 kDa  | INF | 0 | 2 |
| <b>Survival motor neuron protein OS=Mus musculus<br/>GN=Snn1 PE=1 SV=1</b>                                                           | SMN_MOUSE   | 31 kDa  | INF | 0 | 2 |
| <b>2'-5'-oligoadenylate synthase-like protein 1 OS=Mus<br/>musculus GN=Oasl1 PE=2 SV=1</b>                                           | OASL1_MOUSE | 59 kDa  | INF | 0 | 2 |
| <b>AN1-type zinc finger protein 2A OS=Mus musculus<br/>GN=Zfand2a PE=2 SV=1</b>                                                      | ZFN2A_MOUSE | 19 kDa  | INF | 0 | 2 |
| <b>Constitutive coactivator of PPAR-gamma-like protein 2<br/>OS=Mus musculus GN=Fam120c PE=2 SV=3</b>                                | F120C_MOUSE | 120 kDa | INF | 0 | 2 |
| <b>Zinc finger protein 608 OS=Mus musculus GN=Znf608<br/>PE=2 SV=1</b>                                                               | ZN608_MOUSE | 162 kDa | INF | 0 | 2 |
| <b>Transcription elongation factor B polypeptide 3 OS=Mus<br/>musculus GN=Tceb3 PE=1 SV=3</b>                                        | ELOA1_MOUSE | 87 kDa  | INF | 0 | 2 |
| <b>Nucleolar protein 14 OS=Mus musculus GN=Nop14<br/>PE=1 SV=2</b>                                                                   | NOP14_MOUSE | 99 kDa  | INF | 0 | 2 |
| <b>Proteasome subunit beta type-6 OS=Mus musculus<br/>GN=Psm6 PE=1 SV=3</b>                                                          | PSB6_MOUSE  | 25 kDa  | INF | 0 | 2 |
| <b>28S ribosomal protein S7, mitochondrial OS=Mus<br/>musculus GN=Mrps7 PE=2 SV=1</b>                                                | RT07_MOUSE  | 28 kDa  | INF | 0 | 2 |

|                                                                                                                 |             |         |     |   |   |
|-----------------------------------------------------------------------------------------------------------------|-------------|---------|-----|---|---|
| <b>Ubiquitin-like modifier-activating enzyme 1 OS=Mus musculus GN=Uba1 PE=1 SV=1</b>                            | UBA1_MOUSE  | 118 kDa | INF | 0 | 2 |
| <b>GTP-binding protein Rit1 OS=Mus musculus GN=Rit1 PE=1 SV=1</b>                                               | RIT1_MOUSE  | 25 kDa  | INF | 0 | 2 |
| <b>Ras-related protein Rab-38 OS=Mus musculus GN=Rab38 PE=1 SV=1</b>                                            | RAB38_MOUSE | 24 kDa  | INF | 0 | 2 |
| <b>Non-specific lipid-transfer protein OS=Mus musculus GN=Scp2 PE=1 SV=3</b>                                    | NLTP_MOUSE  | 59 kDa  | INF | 0 | 2 |
| <b>Mitochondrial import receptor subunit TOM34 OS=Mus musculus GN=Tom34 PE=2 SV=1</b>                           | TOM34_MOUSE | 34 kDa  | INF | 0 | 2 |
| <b>Coiled-coil domain-containing protein 9 OS=Mus musculus GN=Ccdc9 PE=2 SV=1</b>                               | CCDC9_MOUSE | 61 kDa  | INF | 0 | 2 |
| <b>Protein SCO2 homolog, mitochondrial OS=Mus musculus GN=Sco2 PE=2 SV=1</b>                                    | SCO2_MOUSE  | 29 kDa  | INF | 0 | 2 |
| <b>ATP synthase subunit delta, mitochondrial OS=Mus musculus GN=Atp5d PE=1 SV=1</b>                             | ATPD_MOUSE  | 18 kDa  | INF | 0 | 2 |
| <b>A-kinase anchor protein 8 OS=Mus musculus GN=Akap8 PE=1 SV=1</b>                                             | AKAP8_MOUSE | 76 kDa  | INF | 0 | 2 |
| <b>Disrupted in schizophrenia 1 homolog OS=Mus musculus GN=Disc1 PE=1 SV=2</b>                                  | DISC1_MOUSE | 93 kDa  | INF | 0 | 2 |
| <b>Elongation factor 1-gamma OS=Mus musculus GN=Eef1g PE=1 SV=3</b>                                             | EF1G_MOUSE  | 50 kDa  | INF | 0 | 2 |
| <b>Importin subunit alpha-4 OS=Mus musculus GN=Kpna3 PE=1 SV=1</b>                                              | IMA4_MOUSE  | 58 kDa  | INF | 0 | 2 |
| <b>LYR motif-containing protein 5 OS=Mus musculus GN=Lym5 PE=2 SV=1</b>                                         | LYRM5_MOUSE | 10 kDa  | INF | 0 | 2 |
| <b>PHD finger-like domain-containing protein 5A OS=Mus musculus GN=Phf5a PE=1 SV=1</b>                          | PHF5A_MOUSE | 12 kDa  | INF | 0 | 2 |
| <b>tRNA pseudouridine synthase-like 1 OS=Mus musculus GN=Pusl1 PE=2 SV=1</b>                                    | PUSL1_MOUSE | 32 kDa  | INF | 0 | 2 |
| <b>Protein S100-A4 OS=Mus musculus GN=S100a4 PE=1 SV=1</b>                                                      | S10A4_MOUSE | 12 kDa  | INF | 0 | 2 |
| <b>Myeloid cell nuclear differentiation antigen-like protein OS=Mus musculus GN=Mndal PE=1 SV=1</b>             | MNDAL_MOUSE | 61 kDa  | INF | 0 | 2 |
| <b>Protein BUD31 homolog OS=Mus musculus GN=Bud31 PE=2 SV=1</b>                                                 | BUD31_MOUSE | 12 kDa  | INF | 0 | 2 |
| <b>C-Myc-binding protein OS=Mus musculus GN=Mycbp PE=2 SV=5</b>                                                 | MYCBP_MOUSE | 12 kDa  | INF | 0 | 2 |
| <b>UPF0468 protein C16orf80 homolog OS=Mus musculus GN=Gtl3 PE=2 SV=1</b>                                       | CP080_MOUSE | 23 kDa  | INF | 0 | 2 |
| <b>Calcineurin-like phosphoesterase domain-containing protein 1 OS=Mus musculus GN=Cpped1 PE=2 SV=1</b>         | CPPED_MOUSE | 35 kDa  | INF | 0 | 2 |
| <b>Insulin-like growth factor 2 mRNA-binding protein 2 OS=Mus musculus GN=Igf2bp2 PE=1 SV=1</b>                 | IF2B2_MOUSE | 66 kDa  | INF | 0 | 2 |
| <b>NADH dehydrogenase [ubiquinone] iron-sulfur protein 6, mitochondrial OS=Mus musculus GN=Ndufs6 PE=1 SV=2</b> | NDUS6_MOUSE | 13 kDa  | INF | 0 | 2 |
| <b>Peptidyl-prolyl cis-trans isomerase-like 1 OS=Mus musculus GN=Ppil1 PE=2 SV=1</b>                            | PPIL1_MOUSE | 18 kDa  | INF | 0 | 2 |
| <b>28S ribosomal protein S23, mitochondrial OS=Mus musculus GN=Mrps23 PE=2 SV=1</b>                             | RT23_MOUSE  | 20 kDa  | INF | 0 | 2 |
| <b>DNA polymerase sigma OS=Mus musculus GN=Papd7 PE=2 SV=2</b>                                                  | PAPD7_MOUSE | 60 kDa  | INF | 0 | 2 |
| <b>Clathrin light chain A OS=Mus musculus GN=Clta PE=2 SV=2</b>                                                 | CLCA_MOUSE  | 26 kDa  | INF | 0 | 2 |

|                                                                                                             |             |         |     |   |    |
|-------------------------------------------------------------------------------------------------------------|-------------|---------|-----|---|----|
| <b>TRAF-type zinc finger domain-containing protein 1</b><br>OS=Mus musculus GN=Trafd1 PE=1 SV=1             | TRAD1_MOUSE | 64 kDa  | INF | 0 | 2  |
| <b>Calpain-2 catalytic subunit</b> OS=Mus musculus<br>GN=Capn2 PE=2 SV=4                                    | CAN2_MOUSE  | 80 kDa  | INF | 0 | 2  |
| <b>cAMP-dependent protein kinase type I-alpha regulatory subunit</b> OS=Mus musculus GN=Prkar1a PE=1 SV=3   | KAP0_MOUSE  | 43 kDa  | INF | 0 | 2  |
| <b>Protein CASC3</b> OS=Mus musculus GN=Casc3 PE=1 SV=3                                                     | CASC3_MOUSE | 76 kDa  | INF | 0 | 2  |
| <b>Delphinin</b> OS=Mus musculus GN=Grid2ip PE=1 SV=1                                                       | GRD2I_MOUSE | 132 kDa | INF | 0 | 2  |
| <b>CDGSH iron-sulfur domain-containing protein 1</b><br>OS=Mus musculus GN=Cisd1 PE=1 SV=1                  | CISD1_MOUSE | 12 kDa  | INF | 0 | 2  |
| <b>Serine/threonine-protein kinase TAO1</b> OS=Mus musculus GN=Taok1 PE=1 SV=1                              | TAOK1_MOUSE | 116 kDa | INF | 0 | 2  |
| <b>Putative ATP-dependent RNA helicase DHX30</b> OS=Mus musculus GN=Dhx30 PE=2 SV=1                         | DHX30_MOUSE | 137 kDa | 18  | 1 | 18 |
| <b>Probable JmjC domain-containing histone demethylation protein 2C</b> OS=Mus musculus GN=Jmjd1c PE=1 SV=3 | JHD2C_MOUSE | 261 kDa | 17  | 3 | 50 |
| <b>G2 and S phase-expressed protein 1</b> OS=Mus musculus GN=Gtse1 PE=1 SV=2                                | GTSE1_MOUSE | 79 kDa  | 16  | 1 | 16 |
| <b>Tetratricopeptide repeat protein 28</b> OS=Mus musculus GN=Ttc28 PE=2 SV=3                               | TTC28_MOUSE | 267 kDa | 14  | 1 | 14 |
| <b>Tudor domain-containing protein 3</b> OS=Mus musculus GN=Tdrd3 PE=1 SV=4                                 | TDRD3_MOUSE | 82 kDa  | 13  | 1 | 13 |
| <b>40S ribosomal protein S21</b> OS=Mus musculus GN=Rps21 PE=2 SV=1                                         | RS21_MOUSE  | 9 kDa   | 11  | 1 | 11 |
| <b>Eukaryotic translation initiation factor 3 subunit M</b><br>OS=Mus musculus GN=Elf3m PE=2 SV=1           | EIF3M_MOUSE | 43 kDa  | 10  | 1 | 10 |
| <b>39S ribosomal protein L4, mitochondrial</b> OS=Mus musculus GN=Mrp14 PE=2 SV=1                           | RM04_MOUSE  | 33 kDa  | 10  | 1 | 10 |
| <b>Protein TALPID3</b> OS=Mus musculus GN=Talpid3 PE=2 SV=1                                                 | TALD3_MOUSE | 167 kDa | 10  | 1 | 10 |
| <b>Cancer-related nucleoside-triphosphatase homolog</b><br>OS=Mus musculus GN=Ntpcr PE=2 SV=1               | NTPCR_MOUSE | 21 kDa  | 9   | 1 | 9  |
| <b>TGF-beta-activated kinase 1 and MAP3K7-binding protein 1</b> OS=Mus musculus GN=Tab1 PE=1 SV=2           | TAB1_MOUSE  | 55 kDa  | 9   | 1 | 9  |
| <b>Polypyrimidine tract-binding protein 1</b> OS=Mus musculus GN=Ptbp1 PE=1 SV=2                            | PTBP1_MOUSE | 56 kDa  | 9   | 1 | 9  |
| <b>Fragile X mental retardation protein 1 homolog</b> OS=Mus musculus GN=Fmr1 PE=1 SV=1                     | FMR1_MOUSE  | 69 kDa  | 8.4 | 7 | 47 |
| <b>60S ribosomal protein L26</b> OS=Mus musculus GN=Rpl26 PE=2 SV=1                                         | RL26_MOUSE  | 17 kDa  | 8   | 2 | 16 |
| <b>Protein LYRIC</b> OS=Mus musculus GN=Mtdh PE=1 SV=1                                                      | LYRIC_MOUSE | 64 kDa  | 8   | 1 | 8  |
| <b>Serine/threonine-protein kinase DCLK1</b> OS=Mus musculus GN=Delk1 PE=1 SV=1                             | DCLK1_MOUSE | 84 kDa  | 8   | 1 | 8  |
| <b>Putative helicase MOV-10</b> OS=Mus musculus GN=Mov10 PE=1 SV=2                                          | MOV10_MOUSE | 114 kDa | 7.3 | 3 | 22 |
| <b>Kinesin-like protein KIFC1</b> OS=Mus musculus GN=Kifc1 PE=1 SV=2                                        | KIFC1_MOUSE | 74 kDa  | 7.3 | 3 | 22 |
| <b>Cytochrome c1, heme protein, mitochondrial</b> OS=Mus musculus GN=Cyc1 PE=1 SV=1                         | CY1_MOUSE   | 35 kDa  | 7   | 1 | 7  |
| <b>Zinc finger protein 703</b> OS=Mus musculus GN=Znf703 PE=1 SV=1                                          | ZN703_MOUSE | 59 kDa  | 7   | 1 | 7  |

|                                                                                                                         |             |         |     |    |     |
|-------------------------------------------------------------------------------------------------------------------------|-------------|---------|-----|----|-----|
| <b>YTH domain family protein 3 OS=Mus musculus<br/>GN=Ythdf3 PE=1 SV=2</b>                                              | YTHD3_MOUSE | 64 kDa  | 7   | 1  | 7   |
| <b>C2 domain-containing protein 2-like OS=Mus musculus<br/>GN=C2cd2l PE=1 SV=3</b>                                      | C2C2L_MOUSE | 76 kDa  | 6.7 | 6  | 20  |
| <b>La-related protein 1 OS=Mus musculus GN=Larp1 PE=1<br/>SV=2</b>                                                      | LARP1_MOUSE | 121 kDa | 6.5 | 4  | 26  |
| <b>Lysine--tRNA ligase OS=Mus musculus GN=Kars PE=1<br/>SV=1</b>                                                        | SYK_MOUSE   | 68 kDa  | 6.5 | 2  | 13  |
| <b>Desmoplakin OS=Mus musculus GN=Dsp PE=1 SV=1</b>                                                                     | DESP_MOUSE  | 333 kDa | 6.4 | 14 | 89  |
| <b>EGF-like repeat and discoidin I-like domain-containing<br/>protein 3 OS=Mus musculus GN=Edil3 PE=1 SV=2</b>          | EDIL3_MOUSE | 54 kDa  | 6.2 | 4  | 25  |
| <b>Protein PRRC2C OS=Mus musculus GN=Prrc2c PE=1<br/>SV=3</b>                                                           | PRC2C_MOUSE | 311 kDa | 6.1 | 36 | 218 |
| <b>Eukaryotic translation initiation factor 3 subunit H<br/>OS=Mus musculus GN=Eif3h PE=1 SV=1</b>                      | EIF3H_MOUSE | 40 kDa  | 6   | 3  | 18  |
| <b>Targeting protein for Xklp2 OS=Mus musculus<br/>GN=Tpx2 PE=1 SV=1</b>                                                | TPX2_MOUSE  | 86 kDa  | 6   | 1  | 6   |
| <b>39S ribosomal protein L32, mitochondrial OS=Mus<br/>musculus GN=Mrpl32 PE=2 SV=1</b>                                 | RM32_MOUSE  | 22 kDa  | 6   | 1  | 6   |
| <b>Calcium-binding mitochondrial carrier protein Aralar1<br/>OS=Mus musculus GN=Slc25a12 PE=1 SV=1</b>                  | CMC1_MOUSE  | 75 kDa  | 6   | 1  | 6   |
| <b>AT-rich interactive domain-containing protein 5B<br/>OS=Mus musculus GN=Arid5b PE=1 SV=3</b>                         | ARI5B_MOUSE | 132 kDa | 6   | 1  | 6   |
| <b>Muscleblind-like protein 2 OS=Mus musculus<br/>GN=Mbnl2 PE=2 SV=2</b>                                                | MBNL2_MOUSE | 40 kDa  | 6   | 1  | 6   |
| <b>39S ribosomal protein L16, mitochondrial OS=Mus<br/>musculus GN=Mrpl16 PE=2 SV=1</b>                                 | RM16_MOUSE  | 29 kDa  | 6   | 1  | 6   |
| <b>Macrophage scavenger receptor types I and II OS=Mus<br/>musculus GN=Msrf1 PE=1 SV=3</b>                              | MSRE_MOUSE  | 50 kDa  | 6   | 1  | 6   |
| <b>Fragile X mental retardation syndrome-related protein 1<br/>OS=Mus musculus GN=Fxr1 PE=1 SV=2</b>                    | FXR1_MOUSE  | 76 kDa  | 5.9 | 21 | 125 |
| <b>Eukaryotic translation initiation factor 3 subunit I<br/>OS=Mus musculus GN=Eif3i PE=1 SV=1</b>                      | EIF3I_MOUSE | 36 kDa  | 5.7 | 3  | 17  |
| <b>Heterogeneous nuclear ribonucleoprotein Q OS=Mus<br/>musculus GN=Syncrip PE=1 SV=2</b>                               | HNRPQ_MOUSE | 70 kDa  | 5.6 | 7  | 39  |
| <b>Regulator of nonsense transcripts 1 OS=Mus musculus<br/>GN=Upf1 PE=1 SV=2</b>                                        | RENT1_MOUSE | 124 kDa | 5.3 | 18 | 96  |
| <b>Eukaryotic translation initiation factor 3 subunit C<br/>OS=Mus musculus GN=Eif3c PE=1 SV=1</b>                      | EIF3C_MOUSE | 106 kDa | 5.3 | 7  | 37  |
| <b>Eukaryotic translation initiation factor 3 subunit A<br/>OS=Mus musculus GN=Eif3a PE=1 SV=5</b>                      | EIF3A_MOUSE | 162 kDa | 5.2 | 13 | 68  |
| <b>Guanine nucleotide-binding protein subunit beta-2-like 1<br/>OS=Mus musculus GN=Gnb2l1 PE=1 SV=3</b>                 | GBLP_MOUSE  | 35 kDa  | 5.2 | 4  | 21  |
| <b>Serum albumin OS=Mus musculus GN=Alb PE=1 SV=3</b>                                                                   | ALBU_MOUSE  | 69 kDa  | 5   | 3  | 15  |
| <b>40S ribosomal protein S15 OS=Mus musculus<br/>GN=Rps15 PE=2 SV=2</b>                                                 | RS15_MOUSE  | 17 kDa  | 5   | 2  | 10  |
| <b>D-beta-hydroxybutyrate dehydrogenase, mitochondrial<br/>OS=Mus musculus GN=Bdh1 PE=1 SV=2</b>                        | BDH_MOUSE   | 38 kDa  | 5   | 2  | 10  |
| <b>Transcriptional repressor NF-X1 OS=Mus musculus<br/>GN=Nfx1 PE=2 SV=1</b>                                            | NFX1_MOUSE  | 124 kDa | 5   | 2  | 10  |
| <b>NADH dehydrogenase [ubiquinone] iron-sulfur protein<br/>7, mitochondrial OS=Mus musculus GN=Ndufs7 PE=1<br/>SV=1</b> | NDUS7_MOUSE | 25 kDa  | 5   | 1  | 5   |
| <b>Calcium-independent phospholipase A2-gamma<br/>OS=Mus musculus GN=Pnpla8 PE=2 SV=1</b>                               | PLPL8_MOUSE | 87 kDa  | 5   | 1  | 5   |

|                                                                                                        |             |         |     |    |     |
|--------------------------------------------------------------------------------------------------------|-------------|---------|-----|----|-----|
| <b>Leucine--tRNA ligase, cytoplasmic OS=Mus musculus GN=Lars PE=2 SV=2</b>                             | SYLC_MOUSE  | 134 kDa | 5   | 1  | 5   |
| <b>Transgelin-2 OS=Mus musculus GN=Tagln2 PE=1 SV=4</b>                                                | TAGL2_MOUSE | 22 kDa  | 5   | 1  | 5   |
| <b>Cluster of GTPase HRas OS=Mus musculus GN=Hras1 PE=1 SV=2 (RASH_MOUSE)</b>                          | RASH_MOUSE  | 21 kDa  | 5   | 1  | 5   |
| <b>Protein disulfide-isomerase A3 OS=Mus musculus GN=Pdia3 PE=1 SV=2</b>                               | PDIA3_MOUSE | 57 kDa  | 5   | 1  | 5   |
| <b>RAS protein activator like-3 OS=Mus musculus GN=Rasal3 PE=2 SV=1</b>                                | RASL3_MOUSE | 115 kDa | 5   | 1  | 5   |
| <b>Syntaxin-7 OS=Mus musculus GN=Stx7 PE=1 SV=3</b>                                                    | STX7_MOUSE  | 30 kDa  | 5   | 1  | 5   |
| <b>Tristetraprolin OS=Mus musculus GN=Zfp36 PE=1 SV=1</b>                                              | TTP_MOUSE   | 34 kDa  | 5   | 1  | 5   |
| <b>Serine/threonine-protein kinase A-Raf OS=Mus musculus GN=Araf PE=2 SV=2</b>                         | ARAF_MOUSE  | 68 kDa  | 5   | 1  | 5   |
| <b>Torsin-4A OS=Mus musculus GN=Tor4a PE=2 SV=1</b>                                                    | TOR4A_MOUSE | 48 kDa  | 5   | 1  | 5   |
| <b>Cluster of Protein argonaute-2 OS=Mus musculus GN=Ago2 PE=1 SV=3 (AGO2_MOUSE)</b>                   | AGO2_MOUSE  | 97 kDa  | 4.8 | 5  | 24  |
| <b>Eukaryotic translation initiation factor 4B OS=Mus musculus GN=Eif4b PE=1 SV=1</b>                  | IF4B_MOUSE  | 69 kDa  | 4.8 | 4  | 19  |
| <b>5'-3' exoribonuclease 2 OS=Mus musculus GN=Xrn2 PE=1 SV=1</b>                                       | XRN2_MOUSE  | 109 kDa | 4.7 | 3  | 14  |
| <b>40S ribosomal protein S6 OS=Mus musculus GN=Rps6 PE=1 SV=1</b>                                      | RS6_MOUSE   | 29 kDa  | 4.7 | 3  | 14  |
| <b>NADH dehydrogenase [ubiquinone] 1 beta subcomplex subunit 4 OS=Mus musculus GN=Ndufb4 PE=1 SV=3</b> | NDUB4_MOUSE | 15 kDa  | 4.7 | 3  | 14  |
| <b>Cluster of Neuron navigator 1 OS=Mus musculus GN=Nav1 PE=1 SV=2 (NAV1_MOUSE)</b>                    | NAV1_MOUSE  | 202 kDa | 4.5 | 14 | 63  |
| <b>ELAV-like protein 1 OS=Mus musculus GN=Elav1 PE=1 SV=2</b>                                          | ELAV1_MOUSE | 36 kDa  | 4.5 | 4  | 18  |
| <b>Heterogeneous nuclear ribonucleoprotein A3 OS=Mus musculus GN=Hnrnpa3 PE=1 SV=1</b>                 | ROA3_MOUSE  | 40 kDa  | 4.5 | 2  | 9   |
| <b>ATP-dependent RNA helicase Dhx29 OS=Mus musculus GN=Dhx29 PE=2 SV=1</b>                             | DHX29_MOUSE | 154 kDa | 4.5 | 2  | 9   |
| <b>Ras-related C3 botulinum toxin substrate 2 OS=Mus musculus GN=Rac2 PE=2 SV=1</b>                    | RAC2_MOUSE  | 21 kDa  | 4.5 | 2  | 9   |
| <b>Casein kinase I isoform alpha OS=Mus musculus GN=Csnk1a1 PE=2 SV=2</b>                              | KC1A_MOUSE  | 39 kDa  | 4.5 | 2  | 9   |
| <b>Eukaryotic translation initiation factor 4 gamma 2 OS=Mus musculus GN=Eif4g2 PE=1 SV=2</b>          | IF4G2_MOUSE | 102 kDa | 4.3 | 3  | 13  |
| <b>Protein FRG1 OS=Mus musculus GN=Frg1 PE=1 SV=2</b>                                                  | FRG1_MOUSE  | 29 kDa  | 4.3 | 3  | 13  |
| <b>Transmembrane and coiled-coil domains protein 3 OS=Mus musculus GN=Tmcc3 PE=1 SV=2</b>              | TMCC3_MOUSE | 54 kDa  | 4.3 | 3  | 13  |
| <b>Nuclear fragile X mental retardation-interacting protein 2 OS=Mus musculus GN=Nufip2 PE=1 SV=1</b>  | NUFP2_MOUSE | 76 kDa  | 4.2 | 8  | 34  |
| <b>Protein PRRC2A OS=Mus musculus GN=Prrc2a PE=1 SV=1</b>                                              | PRC2A_MOUSE | 229 kDa | 4.1 | 19 | 77  |
| <b>Polyadenylate-binding protein 1 OS=Mus musculus GN=Pabpc1 PE=1 SV=2</b>                             | PABP1_MOUSE | 71 kDa  | 4   | 37 | 149 |
| <b>40S ribosomal protein S17 OS=Mus musculus GN=Rps17 PE=1 SV=2</b>                                    | RS17_MOUSE  | 16 kDa  | 4   | 9  | 36  |
| <b>40S ribosomal protein S26 OS=Mus musculus GN=Rps26 PE=2 SV=3</b>                                    | RS26_MOUSE  | 13 kDa  | 4   | 5  | 20  |
| <b>Nuclear distribution protein nude homolog 1 OS=Mus musculus GN=Nde1 PE=1 SV=1</b>                   | NDE1_MOUSE  | 39 kDa  | 4   | 4  | 16  |



|                                                                                                                   |                    |         |     |    |    |
|-------------------------------------------------------------------------------------------------------------------|--------------------|---------|-----|----|----|
| <b>LIM domain-containing protein 2 OS=Mus musculus<br/>GN=Limd2 PE=2 SV=1</b>                                     | LIMD2_MOUSE        | 14 kDa  | 4   | 3  | 8  |
| <b>Ig kappa chain V19-17 OS=Mus musculus GN=Igk-V19-17<br/>PE=1 SV=1</b>                                          | KV5A1_MOUSE        | 16 kDa  | 4   | 3  | 8  |
| <b>Transcription factor Sp2 OS=Mus musculus GN=Sp2<br/>PE=2 SV=2</b>                                              | SP2_MOUSE          | 65 kDa  | 4   | 2  | 8  |
| <b>Putative RNA-binding protein 3 OS=Mus musculus<br/>GN=Rbm3 PE=2 SV=1</b>                                       | RBM3_MOUSE         | 17 kDa  | 4   | 2  | 8  |
| <b>Ankyrin repeat domain-containing protein 17 OS=Mus<br/>musculus GN=Ankrd17 PE=1 SV=2</b>                       | ANR17_MOUSE        | 274 kDa | 4   | 2  | 8  |
| <b>Heterogeneous nuclear ribonucleoprotein H2 OS=Mus<br/>musculus GN=Hnrnph2 PE=2 SV=1</b>                        | HNRH2_MOUSE        | 49 kDa  | 4   | 2  | 8  |
| <b>Protein FAM110A OS=Mus musculus GN=Fam110a<br/>PE=2 SV=2</b>                                                   | F110A_MOUSE        | 32 kDa  | 4   | 1  | 5  |
| <b>ADP-ribosylation factor-like protein 8B OS=Mus<br/>musculus GN=Arl8b PE=2 SV=1</b>                             | ARL8B_MOUSE        | 22 kDa  | 4   | 1  | 4  |
| <b>Serine/arginine-rich splicing factor 3 OS=Mus musculus<br/>GN=Srsf3 PE=1 SV=1</b>                              | SRSF3_MOUSE        | 19 kDa  | 4   | 1  | 4  |
| <b>OTU domain-containing protein 4 OS=Mus musculus<br/>GN=Otud4 PE=1 SV=1</b>                                     | OTUD4_MOUSE        | 123 kDa | 4   | 1  | 4  |
| <b>Cluster of Far upstream element-binding protein 2<br/>OS=Mus musculus GN=Khsrp PE=1 SV=2<br/>(FUBP2_MOUSE)</b> | FUBP2_MOUSE<br>[2] | 77 kDa  | 4   | 1  | 4  |
| <b>Active regulator of SIRT1 OS=Mus musculus<br/>GN=Rps19bp1 PE=1 SV=1</b>                                        | AROS_MOUSE         | 16 kDa  | 4   | 1  | 4  |
| <b>Guanine nucleotide-binding protein-like 3-like protein<br/>OS=Mus musculus GN=Gnl3l PE=1 SV=1</b>              | GNL3L_MOUSE        | 65 kDa  | 4   | 1  | 4  |
| <b>Histone H4 OS=Mus musculus GN=Hist1h4a PE=1 SV=2</b>                                                           | H4_MOUSE           | 11 kDa  | 4   | 1  | 4  |
| <b>Leukocyte receptor cluster member 1 homolog OS=Mus<br/>musculus GN=Leng1 PE=2 SV=1</b>                         | LENG1_MOUSE        | 30 kDa  | 4   | 1  | 4  |
| <b>Complement C1q subcomponent subunit A OS=Mus<br/>musculus GN=C1qa PE=1 SV=2</b>                                | C1QA_MOUSE         | 26 kDa  | 4   | 1  | 4  |
| <b>Casein kinase I isoform delta OS=Mus musculus<br/>GN=Csnk1d PE=1 SV=2</b>                                      | KC1D_MOUSE         | 47 kDa  | 4   | 1  | 4  |
| <b>Calnexin OS=Mus musculus GN=Canx PE=1 SV=1</b>                                                                 | CALX_MOUSE         | 67 kDa  | 4   | 1  | 4  |
| <b>Mitochondrial import inner membrane translocase<br/>subunit TIM16 OS=Mus musculus GN=Pam16 PE=2<br/>SV=1</b>   | TIM16_MOUSE        | 14 kDa  | 4   | 1  | 4  |
| <b>FERM domain-containing protein 4A OS=Mus musculus<br/>GN=Frmd4a PE=1 SV=2</b>                                  | FRM4A_MOUSE        | 114 kDa | 4   | 1  | 4  |
| <b>Junction plakoglobin OS=Mus musculus GN=Jup PE=1<br/>SV=3</b>                                                  | PLAK_MOUSE         | 82 kDa  | 3.9 | 16 | 63 |
| <b>DNA replication factor Cdt1 OS=Mus musculus<br/>GN=Cdt1 PE=1 SV=1</b>                                          | CDT1_MOUSE         | 62 kDa  | 3.8 | 4  | 15 |
| <b>Eukaryotic translation initiation factor 3 subunit D<br/>OS=Mus musculus GN=Eif3d PE=1 SV=2</b>                | EIF3D_MOUSE        | 64 kDa  | 3.7 | 7  | 26 |
| <b>Cytochrome c oxidase subunit 6C OS=Mus musculus<br/>GN=Cox6c PE=1 SV=3</b>                                     | COX6C_MOUSE        | 8 kDa   | 3.7 | 3  | 11 |
| <b>Ribosomal RNA processing protein 1 homolog B<br/>OS=Mus musculus GN=Rrp1b PE=2 SV=2</b>                        | RRP1B_MOUSE        | 81 kDa  | 3.7 | 3  | 11 |
| <b>Fragile X mental retardation syndrome-related protein 2<br/>OS=Mus musculus GN=Fxr2 PE=1 SV=1</b>              | FXR2_MOUSE         | 74 kDa  | 3.6 | 16 | 53 |
| <b>40S ribosomal protein S30 OS=Mus musculus GN=Fau<br/>PE=3 SV=1</b>                                             | RS30_MOUSE         | 7 kDa   | 3.5 | 4  | 14 |

|                                                                                                       |             |         |     |    |    |
|-------------------------------------------------------------------------------------------------------|-------------|---------|-----|----|----|
| <b>40S ribosomal protein S2 OS=Mus musculus GN=Rps2 PE=2 SV=3</b>                                     | RS2_MOUSE   | 31 kDa  | 3.5 | 4  | 14 |
| <b>T-complex protein 1 subunit theta OS=Mus musculus GN=Cct8 PE=1 SV=3</b>                            | TCPQ_MOUSE  | 60 kDa  | 3.5 | 4  | 14 |
| <b>60S ribosomal protein L17 OS=Mus musculus GN=Rpl17 PE=2 SV=3</b>                                   | RL17_MOUSE  | 21 kDa  | 3.5 | 2  | 7  |
| <b>Phosphate carrier protein, mitochondrial OS=Mus musculus GN=Slc25a3 PE=1 SV=1</b>                  | MPCP_MOUSE  | 40 kDa  | 3.5 | 2  | 7  |
| <b>Peptidyl-prolyl cis-trans isomerase B OS=Mus musculus GN=Ppib PE=2 SV=2</b>                        | PIIB_MOUSE  | 24 kDa  | 3.5 | 2  | 7  |
| <b>Rho GTPase-activating protein 22 OS=Mus musculus GN=Arhgap22 PE=1 SV=2</b>                         | RHG22_MOUSE | 78 kDa  | 3.5 | 2  | 7  |
| <b>Vinexin OS=Mus musculus GN=Sorbs3 PE=1 SV=1</b>                                                    | VINEX_MOUSE | 82 kDa  | 3.5 | 2  | 7  |
| <b>40S ribosomal protein S29 OS=Mus musculus GN=Rps29 PE=2 SV=2</b>                                   | RS29_MOUSE  | 7 kDa   | 3.5 | 2  | 7  |
| <b>Mitochondrial 2-oxoglutarate/malate carrier protein OS=Mus musculus GN=Slc25a11 PE=1 SV=3</b>      | M2OM_MOUSE  | 34 kDa  | 3.5 | 2  | 7  |
| <b>Tyrosine-protein phosphatase non-receptor type 12 OS=Mus musculus GN=Ptpn12 PE=1 SV=3</b>          | PTN12_MOUSE | 87 kDa  | 3.5 | 2  | 7  |
| <b>60S ribosomal protein L27a OS=Mus musculus GN=Rpl27a PE=2 SV=5</b>                                 | RL27A_MOUSE | 17 kDa  | 3.5 | 2  | 7  |
| <b>Dehydrogenase/reductase SDR family member 7B OS=Mus musculus GN=Dhrs7b PE=2 SV=1</b>               | DRS7B_MOUSE | 35 kDa  | 3.5 | 2  | 7  |
| <b>ETS domain-containing transcription factor ERF OS=Mus musculus GN=Erf PE=2 SV=1</b>                | ERF_MOUSE   | 59 kDa  | 3.5 | 2  | 7  |
| <b>40S ribosomal protein S18 OS=Mus musculus GN=Rps18 PE=1 SV=3</b>                                   | RS18_MOUSE  | 18 kDa  | 3.4 | 8  | 27 |
| <b>ATP synthase subunit gamma, mitochondrial OS=Mus musculus GN=Atp5c1 PE=1 SV=1</b>                  | ATPG_MOUSE  | 33 kDa  | 3.3 | 13 | 43 |
| <b>40S ribosomal protein S5 OS=Mus musculus GN=Rps5 PE=2 SV=3</b>                                     | RS5_MOUSE   | 23 kDa  | 3.3 | 7  | 23 |
| <b>Eukaryotic translation initiation factor 3 subunit G OS=Mus musculus GN=Eif3g PE=1 SV=2</b>        | EIF3G_MOUSE | 36 kDa  | 3.3 | 3  | 10 |
| <b>40S ribosomal protein S10 OS=Mus musculus GN=Rps10 PE=1 SV=1</b>                                   | RS10_MOUSE  | 19 kDa  | 3.2 | 20 | 66 |
| <b>Ataxin-2-like protein OS=Mus musculus GN=Atxn2l PE=1 SV=1</b>                                      | ATX2L_MOUSE | 111 kDa | 3.2 | 9  | 29 |
| <b>40S ribosomal protein S13 OS=Mus musculus GN=Rps13 PE=2 SV=2</b>                                   | RS13_MOUSE  | 17 kDa  | 3.2 | 5  | 16 |
| <b>60S ribosomal protein L22-like 1 OS=Mus musculus GN=Rpl22l1 PE=1 SV=1</b>                          | RL22L_MOUSE | 14 kDa  | 3.2 | 5  | 16 |
| <b>Y-box-binding protein 3 OS=Mus musculus GN=Ybx3 PE=1 SV=2</b>                                      | YBOX3_MOUSE | 39 kDa  | 3.1 | 10 | 35 |
| <b>Eukaryotic translation initiation factor 4 gamma 1 OS=Mus musculus GN=Eif4g1 PE=1 SV=1</b>         | IF4G1_MOUSE | 176 kDa | 3.1 | 8  | 25 |
| <b>Ataxin-2 OS=Mus musculus GN=Atxn2 PE=1 SV=1</b>                                                    | ATX2_MOUSE  | 136 kDa | 3   | 23 | 69 |
| <b>Nuclease-sensitive element-binding protein 1 OS=Mus musculus GN=Ybx1 PE=1 SV=3</b>                 | YBOX1_MOUSE | 36 kDa  | 3   | 23 | 68 |
| <b>Protein LAP2 OS=Mus musculus GN=Erbp2ip PE=1 SV=3</b>                                              | LAP2_MOUSE  | 157 kDa | 3   | 15 | 45 |
| <b>Non-POU domain-containing octamer-binding protein OS=Mus musculus GN=Nono PE=1 SV=3</b>            | NONO_MOUSE  | 55 kDa  | 3   | 9  | 25 |
| <b>Cluster of Serine/threonine-protein kinase WNK1 OS=Mus musculus GN=Wnk1 PE=1 SV=2 (WNK1_MOUSE)</b> | WNK1_MOUSE  | 251 kDa | 3   | 7  | 18 |

|                                                                                                              |                 |         |   |   |    |
|--------------------------------------------------------------------------------------------------------------|-----------------|---------|---|---|----|
| <b>Protein SPT2 homolog OS=Mus musculus GN=Spty2d1 PE=2 SV=1</b>                                             | SPT2_MOUSE      | 75 kDa  | 3 | 6 | 18 |
| <b>La-related protein 4 OS=Mus musculus GN=Larp4 PE=2 SV=2</b>                                               | LARP4_MOUSE     | 80 kDa  | 3 | 6 | 18 |
| <b>RNA-binding motif protein, X chromosome OS=Mus musculus GN=Rbmx PE=1 SV=1</b>                             | RBMX_MOUSE (+1) | 42 kDa  | 3 | 6 | 18 |
| <b>Eukaryotic translation initiation factor 4 gamma 3 OS=Mus musculus GN=Eif4g3 PE=1 SV=2</b>                | IF4G3_MOUSE     | 175 kDa | 3 | 4 | 12 |
| <b>5'-3' exoribonuclease 1 OS=Mus musculus GN=Xrn1 PE=1 SV=1</b>                                             | XRN1_MOUSE      | 194 kDa | 3 | 3 | 9  |
| <b>Probable pleckstrin homology domain-containing family N member 1 OS=Mus musculus GN=Plekhn1 PE=1 SV=1</b> | PKHN1_MOUSE     | 39 kDa  | 3 | 3 | 9  |
| <b>Vasculin-like protein 1 OS=Mus musculus GN=Gpbp111 PE=1 SV=1</b>                                          | GPBL1_MOUSE     | 52 kDa  | 3 | 2 | 6  |
| <b>Peptidyl-tRNA hydrolase ICT1, mitochondrial OS=Mus musculus GN=Ict1 PE=1 SV=1</b>                         | ICT1_MOUSE      | 23 kDa  | 3 | 2 | 6  |
| <b>Myelin-associated neurite-outgrowth inhibitor OS=Mus musculus GN=Fam168b PE=1 SV=1</b>                    | F168B_MOUSE     | 20 kDa  | 3 | 2 | 6  |
| <b>CAP-Gly domain-containing linker protein 2 OS=Mus musculus GN=Clip2 PE=1 SV=2</b>                         | CLIP2_MOUSE     | 116 kDa | 3 | 2 | 6  |
| <b>NADH dehydrogenase (ubiquinone) complex I, assembly factor 6 OS=Mus musculus GN=Ndufaf6 PE=1 SV=1</b>     | NDUF6_MOUSE     | 38 kDa  | 3 | 2 | 6  |
| <b>Platelet-derived growth factor subunit B OS=Mus musculus GN=Pdgfb PE=2 SV=1</b>                           | PDGFB_MOUSE     | 27 kDa  | 3 | 2 | 6  |
| <b>Protein transport protein Sec61 subunit beta OS=Mus musculus GN=Sec61b PE=1 SV=3</b>                      | SC61B_MOUSE     | 10 kDa  | 3 | 2 | 6  |
| <b>60S ribosomal protein L18a OS=Mus musculus GN=Rpl18a PE=2 SV=1</b>                                        | RL18A_MOUSE     | 21 kDa  | 3 | 1 | 4  |
| <b>Interferon regulatory factor 2-binding protein 2 OS=Mus musculus GN=Irf2bp2 PE=1 SV=1</b>                 | I2BP2_MOUSE     | 59 kDa  | 3 | 1 | 3  |
| <b>39S ribosomal protein L43, mitochondrial OS=Mus musculus GN=Mrpl43 PE=2 SV=1</b>                          | RM43_MOUSE      | 20 kDa  | 3 | 1 | 3  |
| <b>Protein TANC2 OS=Mus musculus GN=Tanc2 PE=1 SV=1</b>                                                      | TANC2_MOUSE     | 220 kDa | 3 | 1 | 3  |
| <b>60S ribosomal protein L13 OS=Mus musculus GN=Rpl13 PE=2 SV=3</b>                                          | RL13_MOUSE      | 24 kDa  | 3 | 1 | 3  |
| <b>ATP-dependent RNA helicase A OS=Mus musculus GN=Dhx9 PE=1 SV=2</b>                                        | DHX9_MOUSE      | 149 kDa | 3 | 1 | 3  |
| <b>Protein FAM65A OS=Mus musculus GN=Fam65a PE=1 SV=2</b>                                                    | FA65A_MOUSE     | 132 kDa | 3 | 1 | 3  |
| <b>E3 ubiquitin/ISG15 ligase TRIM25 OS=Mus musculus GN=Trim25 PE=1 SV=2</b>                                  | TRI25_MOUSE     | 72 kDa  | 3 | 1 | 3  |
| <b>Profilin-1 OS=Mus musculus GN=Pfn1 PE=1 SV=2</b>                                                          | PROF1_MOUSE     | 15 kDa  | 3 | 1 | 3  |
| <b>26S proteasome non-ATPase regulatory subunit 3 OS=Mus musculus GN=Psmd3 PE=1 SV=3</b>                     | PSMD3_MOUSE     | 61 kDa  | 3 | 1 | 3  |
| <b>NEDD4-like E3 ubiquitin-protein ligase WWP2 OS=Mus musculus GN=Wwp2 PE=1 SV=1</b>                         | WWP2_MOUSE      | 99 kDa  | 3 | 1 | 3  |
| <b>Coatomer subunit gamma-1 OS=Mus musculus GN=Copg1 PE=2 SV=1</b>                                           | COPG1_MOUSE     | 98 kDa  | 3 | 1 | 3  |
| <b>Protein FAM117B OS=Mus musculus GN=Fam117b PE=1 SV=1</b>                                                  | F117B_MOUSE     | 61 kDa  | 3 | 1 | 3  |
| <b>S-formylglutathione hydrolase OS=Mus musculus GN=Esd PE=2 SV=1</b>                                        | ESTD_MOUSE      | 31 kDa  | 3 | 1 | 3  |



|                                                                                                                   |             |         |     |    |     |
|-------------------------------------------------------------------------------------------------------------------|-------------|---------|-----|----|-----|
| <b>28S ribosomal protein S33, mitochondrial OS=Mus musculus GN=Mrps33 PE=2 SV=1</b>                               | RT33_MOUSE  | 12 kDa  | 3   | 1  | 3   |
| <b>Aminoacyl tRNA synthase complex-interacting multifunctional protein 1 OS=Mus musculus GN=Aimp1 PE=1 SV=2</b>   | AIMP1_MOUSE | 34 kDa  | 3   | 1  | 3   |
| <b>E3 ubiquitin-protein ligase TRIM56 OS=Mus musculus GN=Trim56 PE=1 SV=1</b>                                     | TRI56_MOUSE | 80 kDa  | 3   | 1  | 3   |
| <b>39S ribosomal protein L50, mitochondrial OS=Mus musculus GN=Mrpl50 PE=2 SV=2</b>                               | RM50_MOUSE  | 18 kDa  | 3   | 1  | 3   |
| <b>Constitutive coactivator of PPAR-gamma-like protein 1 OS=Mus musculus GN=FAM120A PE=1 SV=2</b>                 | F120A_MOUSE | 122 kDa | 2.9 | 34 | 100 |
| <b>Neuronal tyrosine-phosphorylated phosphoinositide-3-kinase adapter 2 OS=Mus musculus GN=Nyap2 PE=1 SV=1</b>    | NYAP2_MOUSE | 74 kDa  | 2.9 | 16 | 47  |
| <b>Serine/threonine-protein phosphatase PGAM5, mitochondrial OS=Mus musculus GN=Pgam5 PE=2 SV=1</b>               | PGAM5_MOUSE | 32 kDa  | 2.9 | 12 | 35  |
| <b>40S ribosomal protein S8 OS=Mus musculus GN=Rps8 PE=2 SV=2</b>                                                 | RS8_MOUSE   | 24 kDa  | 2.9 | 7  | 20  |
| <b>Heterogeneous nuclear ribonucleoproteins A2/B1 OS=Mus musculus GN=Hnrnpa2b1 PE=1 SV=2</b>                      | ROA2_MOUSE  | 37 kDa  | 2.8 | 9  | 25  |
| <b>Protein FAM83G OS=Mus musculus GN=Fam83g PE=2 SV=1</b>                                                         | FA83G_MOUSE | 90 kDa  | 2.8 | 8  | 22  |
| <b>28S ribosomal protein S12, mitochondrial OS=Mus musculus GN=Mrps12 PE=2 SV=1</b>                               | RT12_MOUSE  | 15 kDa  | 2.8 | 6  | 17  |
| <b>14-3-3 protein epsilon OS=Mus musculus GN=Ywhae PE=1 SV=1</b>                                                  | 1433E_MOUSE | 29 kDa  | 2.8 | 6  | 17  |
| <b>Gem-associated protein 5 OS=Mus musculus GN=Gemin5 PE=2 SV=2</b>                                               | GEMI5_MOUSE | 167 kDa | 2.8 | 5  | 14  |
| <b>U6 snRNA-associated Sm-like protein LSm4 OS=Mus musculus GN=Lsm4 PE=2 SV=1</b>                                 | LSM4_MOUSE  | 15 kDa  | 2.8 | 4  | 11  |
| <b>PTB-containing, cubilin and LRP1-interacting protein OS=Mus musculus GN=Pid1 PE=1 SV=2</b>                     | PCLI1_MOUSE | 25 kDa  | 2.8 | 4  | 11  |
| <b>Cluster of IQ motif and SEC7 domain-containing protein 1 OS=Mus musculus GN=Iqsec1 PE=1 SV=2 (IQEC1_MOUSE)</b> | IQEC1_MOUSE | 108 kDa | 2.7 | 15 | 40  |
| <b>40S ribosomal protein S16 OS=Mus musculus GN=Rps16 PE=2 SV=4</b>                                               | RS16_MOUSE  | 16 kDa  | 2.7 | 13 | 35  |
| <b>CREB-regulated transcription coactivator 2 OS=Mus musculus GN=Crtc2 PE=1 SV=2</b>                              | CRTC2_MOUSE | 73 kDa  | 2.7 | 12 | 32  |
| <b>CDGSH iron-sulfur domain-containing protein 3, mitochondrial OS=Mus musculus GN=Cisd3 PE=1 SV=1</b>            | CISD3_MOUSE | 16 kDa  | 2.7 | 6  | 16  |
| <b>ATP synthase subunit e, mitochondrial OS=Mus musculus GN=Atp5i PE=1 SV=2</b>                                   | ATP5I_MOUSE | 8 kDa   | 2.7 | 3  | 8   |
| <b>Single-stranded DNA-binding protein, mitochondrial OS=Mus musculus GN=Ssbp1 PE=2 SV=1</b>                      | SSBP_MOUSE  | 17 kDa  | 2.7 | 3  | 8   |
| <b>Ras GTPase-activating protein-binding protein 1 OS=Mus musculus GN=G3bp1 PE=1 SV=1</b>                         | G3BP1_MOUSE | 52 kDa  | 2.6 | 41 | 107 |
| <b>40S ribosomal protein S3a OS=Mus musculus GN=Rps3a PE=1 SV=3</b>                                               | RS3A_MOUSE  | 30 kDa  | 2.6 | 30 | 78  |
| <b>RNA-binding protein 33 OS=Mus musculus GN=Rbm33 PE=1 SV=2</b>                                                  | RBM33_MOUSE | 137 kDa | 2.6 | 27 | 70  |
| <b>60S ribosomal protein L23a OS=Mus musculus GN=Rpl23a PE=1 SV=1</b>                                             | RL23A_MOUSE | 18 kDa  | 2.6 | 9  | 23  |
| <b>60 kDa heat shock protein, mitochondrial OS=Mus musculus GN=Hspd1 PE=1 SV=1</b>                                | CH60_MOUSE  | 61 kDa  | 2.6 | 5  | 13  |

|                                                                                                     |                    |         |     |    |    |
|-----------------------------------------------------------------------------------------------------|--------------------|---------|-----|----|----|
| <b>Serine/arginine-rich splicing factor 1 OS=Mus musculus<br/>GN=Srsf1 PE=1 SV=3</b>                | SRSF1_MOUSE        | 28 kDa  | 2.6 | 5  | 13 |
| <b>Eukaryotic translation initiation factor 3 subunit B<br/>OS=Mus musculus GN=Eif3b PE=1 SV=1</b>  | EIF3B_MOUSE        | 91 kDa  | 2.5 | 13 | 33 |
| <b>ETS translocation variant 3 OS=Mus musculus GN=Etv3<br/>PE=2 SV=2</b>                            | ETV3_MOUSE         | 57 kDa  | 2.5 | 6  | 15 |
| <b>60S ribosomal protein L31 OS=Mus musculus<br/>GN=Rpl31 PE=2 SV=1</b>                             | RL31_MOUSE         | 14 kDa  | 2.5 | 4  | 10 |
| <b>Adenomatous polyposis coli protein OS=Mus musculus<br/>GN=Apc PE=1 SV=1</b>                      | APC_MOUSE          | 311 kDa | 2.5 | 4  | 10 |
| <b>Rho GTPase-activating protein 31 OS=Mus musculus<br/>GN=Arhgap31 PE=1 SV=1</b>                   | RHG31_MOUSE        | 155 kDa | 2.5 | 4  | 10 |
| <b>Rab11 family-interacting protein 5 OS=Mus musculus<br/>GN=Rab11fip5 PE=1 SV=2</b>                | RFIP5_MOUSE        | 70 kDa  | 2.5 | 2  | 5  |
| <b>UNC119-binding protein C5orf30 homolog OS=Mus<br/>musculus GN=D1Ertd622e PE=2 SV=1</b>           | CE030_MOUSE        | 23 kDa  | 2.5 | 2  | 5  |
| <b>UPF0568 protein C14orf166 homolog OS=Mus musculus<br/>PE=2 SV=1</b>                              | CN166_MOUSE        | 28 kDa  | 2.5 | 2  | 5  |
| <b>Small nuclear ribonucleoprotein-associated protein B<br/>OS=Mus musculus GN=Snrpb PE=1 SV=1</b>  | RSMB_MOUSE<br>(+1) | 24 kDa  | 2.5 | 2  | 5  |
| <b>60S ribosomal protein L8 OS=Mus musculus GN=Rpl8<br/>PE=2 SV=2</b>                               | RL8_MOUSE          | 28 kDa  | 2.5 | 2  | 5  |
| <b>Serpin B6 OS=Mus musculus GN=Serpib6 PE=2 SV=1</b>                                               | SPB6_MOUSE         | 43 kDa  | 2.5 | 2  | 5  |
| <b>Ig kappa chain V region Mem5 (Fragment) OS=Mus<br/>musculus PE=1 SV=1</b>                        | KVM5_MOUSE         | 13 kDa  | 2.5 | 2  | 5  |
| <b>Protein LSM14 homolog A OS=Mus musculus<br/>GN=Lsm14a PE=1 SV=1</b>                              | LS14A_MOUSE        | 51 kDa  | 2.4 | 20 | 48 |
| <b>Ubiquitin-associated protein 2-like OS=Mus musculus<br/>GN=Ubp2l PE=1 SV=1</b>                   | UBP2L_MOUSE        | 117 kDa | 2.4 | 13 | 31 |
| <b>Small nuclear ribonucleoprotein Sm D3 OS=Mus<br/>musculus GN=Snrpd3 PE=1 SV=1</b>                | SMD3_MOUSE         | 14 kDa  | 2.4 | 8  | 19 |
| <b>Importin subunit beta-1 OS=Mus musculus GN=Kpnb1<br/>PE=1 SV=2</b>                               | IMB1_MOUSE         | 97 kDa  | 2.4 | 5  | 12 |
| <b>GAS2-like protein 3 OS=Mus musculus GN=Gas2l3<br/>PE=2 SV=1</b>                                  | GA2L3_MOUSE        | 74 kDa  | 2.4 | 5  | 12 |
| <b>LIM and SH3 domain protein 1 OS=Mus musculus<br/>GN=Lasp1 PE=1 SV=1</b>                          | LASP1_MOUSE        | 30 kDa  | 2.4 | 5  | 12 |
| <b>Serine-threonine kinase receptor-associated protein<br/>OS=Mus musculus GN=Strap PE=1 SV=2</b>   | STRAP_MOUSE        | 38 kDa  | 2.4 | 5  | 12 |
| <b>DNA topoisomerase 3-beta-1 OS=Mus musculus<br/>GN=Top3b PE=2 SV=1</b>                            | TOP3B_MOUSE        | 97 kDa  | 2.4 | 5  | 12 |
| <b>Ras GTPase-activating protein-binding protein 2<br/>OS=Mus musculus GN=G3bp2 PE=1 SV=2</b>       | G3BP2_MOUSE        | 54 kDa  | 2.3 | 20 | 47 |
| <b>60S ribosomal protein L22 OS=Mus musculus<br/>GN=Rpl22 PE=2 SV=2</b>                             | RL22_MOUSE         | 15 kDa  | 2.3 | 3  | 7  |
| <b>PR domain zinc finger protein 1 OS=Mus musculus<br/>GN=Prdm1 PE=1 SV=1</b>                       | PRDM1_MOUSE        | 96 kDa  | 2.2 | 13 | 29 |
| <b>Eukaryotic translation initiation factor 3 subunit L<br/>OS=Mus musculus GN=Eif3l PE=1 SV=1</b>  | EIF3L_MOUSE        | 67 kDa  | 2.2 | 11 | 24 |
| <b>Protein Hook homolog 3 OS=Mus musculus GN=Hook3<br/>PE=1 SV=2</b>                                | HOOK3_MOUSE        | 83 kDa  | 2.2 | 11 | 24 |
| <b>40S ribosomal protein S15a OS=Mus musculus<br/>GN=Rps15a PE=2 SV=2</b>                           | RS15A_MOUSE        | 15 kDa  | 2.2 | 10 | 22 |
| <b>Cytoplasmic polyadenylation element-binding protein 4<br/>OS=Mus musculus GN=Cpeb4 PE=1 SV=1</b> | CPEB4_MOUSE        | 80 kDa  | 2.2 | 8  | 18 |

|                                                                                                                                 |             |          |     |     |     |
|---------------------------------------------------------------------------------------------------------------------------------|-------------|----------|-----|-----|-----|
| <b>Peptidyl-prolyl cis-trans isomerase A OS=Mus musculus<br/>GN=Ppia PE=1 SV=2</b>                                              | PPIA_MOUSE  | 18 kDa   | 2.2 | 6   | 13  |
| <b>Plasminogen activator inhibitor 1 RNA-binding protein<br/>OS=Mus musculus GN=Serbp1 PE=1 SV=2</b>                            | PAIRB_MOUSE | 45 kDa   | 2.2 | 6   | 13  |
| <b>Collagen alpha-1(I) chain OS=Mus musculus<br/>GN=Col1a1 PE=1 SV=4</b>                                                        | CO1A1_MOUSE | 138 kDa  | 2.2 | 5   | 11  |
| <b>40S ribosomal protein S24 OS=Mus musculus<br/>GN=Rps24 PE=2 SV=1</b>                                                         | RS24_MOUSE  | 15 kDa   | 2.2 | 4   | 9   |
| <b>60S ribosomal protein L23 OS=Mus musculus<br/>GN=Rpl23 PE=1 SV=1</b>                                                         | RL23_MOUSE  | 15 kDa   | 2.1 | 167 | 352 |
| <b>40S ribosomal protein S4, X isoform OS=Mus musculus<br/>GN=Rps4x PE=2 SV=2</b>                                               | RS4X_MOUSE  | 30 kDa   | 2.1 | 30  | 62  |
| <b>Splicing factor, proline- and glutamine-rich OS=Mus<br/>musculus GN=Sfpq PE=1 SV=1</b>                                       | SFPQ_MOUSE  | 75 kDa   | 2.1 | 18  | 38  |
| <b>60S ribosomal protein L10 OS=Mus musculus<br/>GN=Rpl10 PE=2 SV=3</b>                                                         | RL10_MOUSE  | 25 kDa   | 2.1 | 18  | 37  |
| <b>Ribosome-binding protein 1 OS=Mus musculus<br/>GN=Rrbp1 PE=1 SV=2</b>                                                        | RRBP1_MOUSE | 173 kDa  | 2.1 | 15  | 32  |
| <b>Heterogeneous nuclear ribonucleoprotein M OS=Mus<br/>musculus GN=Hnrnmp PE=1 SV=3</b>                                        | HNRPM_MOUSE | 78 kDa   | 2.1 | 14  | 30  |
| <b>ATP-dependent RNA helicase DDX1 OS=Mus musculus<br/>GN=Ddx1 PE=1 SV=1</b>                                                    | DDX1_MOUSE  | 83 kDa   | 2.1 | 14  | 30  |
| <b>La-related protein 4B OS=Mus musculus GN=Larp4b<br/>PE=1 SV=2</b>                                                            | LAR4B_MOUSE | 82 kDa   | 2.1 | 13  | 27  |
| <b>40S ribosomal protein SA OS=Mus musculus GN=Rpsa<br/>PE=1 SV=4</b>                                                           | RSSA_MOUSE  | 33 kDa   | 2.1 | 9   | 19  |
| <b>Heterogeneous nuclear ribonucleoprotein A1 OS=Mus<br/>musculus GN=Hnrnpa1 PE=1 SV=2</b>                                      | ROA1_MOUSE  | 34 kDa   | 2.1 | 7   | 15  |
| <b>Microtubule-associated protein 4 OS=Mus musculus<br/>GN=Map4 PE=1 SV=3</b>                                                   | MAP4_MOUSE  | 117 kDa  | 2   | 64  | 131 |
| <b>Heterogeneous nuclear ribonucleoprotein K OS=Mus<br/>musculus GN=Hnrnpk PE=1 SV=1</b>                                        | HNRPK_MOUSE | 51 kDa   | 2   | 14  | 28  |
| <b>Serine-rich coiled-coil domain-containing protein 2<br/>OS=Mus musculus GN=Ccser2 PE=1 SV=1</b>                              | CCSE2_MOUSE | 93 kDa   | 2   | 11  | 22  |
| <b>Prohibitin-2 OS=Mus musculus GN=Phb2 PE=1 SV=1</b>                                                                           | PHB2_MOUSE  | 33 kDa   | 2   | 9   | 18  |
| <b>40S ribosomal protein S12 OS=Mus musculus<br/>GN=Rps12 PE=1 SV=2</b>                                                         | RS12_MOUSE  | 15 kDa   | 2   | 8   | 16  |
| <b>KH domain-containing, RNA-binding, signal<br/>transduction-associated protein 1 OS=Mus musculus<br/>GN=Khdrbs1 PE=1 SV=2</b> | KHDR1_MOUSE | 48 kDa   | 2   | 6   | 12  |
| <b>40S ribosomal protein S23 OS=Mus musculus<br/>GN=Rps23 PE=2 SV=3</b>                                                         | RS23_MOUSE  | 16 kDa   | 2   | 6   | 12  |
| <b>Transcriptional activator protein Pur-alpha OS=Mus<br/>musculus GN=Pura PE=1 SV=1</b>                                        | PURA_MOUSE  | 35 kDa   | 2   | 6   | 12  |
| <b>60S ribosomal protein L5 OS=Mus musculus GN=Rpl5<br/>PE=1 SV=3</b>                                                           | RL5_MOUSE   | 34 kDa   | 2   | 5   | 10  |
| <b>rRNA 2'-O-methyltransferase fibrillar OS=Mus<br/>musculus GN=Fbl PE=2 SV=2</b>                                               | FBRL_MOUSE  | 34 kDa   | 2   | 5   | 10  |
| <b>Paraspeckle component 1 OS=Mus musculus GN=Pspc1<br/>PE=1 SV=1</b>                                                           | PSPC1_MOUSE | 59 kDa   | 2   | 5   | 10  |
| <b>Titin OS=Mus musculus GN=Ttn PE=1 SV=1</b>                                                                                   | TITIN_MOUSE | 3906 kDa | 2   | 4   | 8   |
| <b>60S ribosomal protein L36a OS=Mus musculus<br/>GN=Rpl36a PE=3 SV=2</b>                                                       | RL36A_MOUSE | 12 kDa   | 2   | 4   | 8   |
| <b>Uracil phosphoribosyltransferase homolog OS=Mus<br/>musculus GN=Uprt PE=2 SV=1</b>                                           | UPP_MOUSE   | 34 kDa   | 2   | 4   | 8   |

|                                                                                                                               |             |         |   |   |   |
|-------------------------------------------------------------------------------------------------------------------------------|-------------|---------|---|---|---|
| <b>V-type proton ATPase subunit G 1 OS=Mus musculus<br/>GN=Atp6v1g1 PE=2 SV=3</b>                                             | VATG1_MOUSE | 14 kDa  | 2 | 4 | 8 |
| <b>Myelin basic protein OS=Mus musculus GN=Mbp PE=1<br/>SV=2</b>                                                              | MBP_MOUSE   | 27 kDa  | 2 | 4 | 8 |
| <b>Growth arrest and DNA damage-inducible proteins-<br/>interacting protein 1 OS=Mus musculus<br/>GN=Gadd45gip1 PE=2 SV=1</b> | G45IP_MOUSE | 26 kDa  | 2 | 4 | 8 |
| <b>Ig mu chain C region OS=Mus musculus GN=Ighm<br/>PE=1 SV=2</b>                                                             | IGHM_MOUSE  | 50 kDa  | 2 | 4 | 8 |
| <b>39S ribosomal protein L41, mitochondrial OS=Mus<br/>musculus GN=Mrpl41 PE=2 SV=1</b>                                       | RM41_MOUSE  | 15 kDa  | 2 | 4 | 8 |
| <b>Uridine-cytidine kinase-like 1 OS=Mus musculus<br/>GN=Uckl1 PE=2 SV=1</b>                                                  | UCKL1_MOUSE | 61 kDa  | 2 | 3 | 6 |
| <b>Elongation factor Tu, mitochondrial OS=Mus musculus<br/>GN=Tufm PE=1 SV=1</b>                                              | EFTU_MOUSE  | 50 kDa  | 2 | 3 | 6 |
| <b>Phenylalanine--tRNA ligase alpha subunit OS=Mus<br/>musculus GN=Farsa PE=2 SV=1</b>                                        | SYFA_MOUSE  | 58 kDa  | 2 | 3 | 6 |
| <b>AFG3-like protein 2 OS=Mus musculus GN=Afg3l2<br/>PE=1 SV=1</b>                                                            | AFG32_MOUSE | 90 kDa  | 2 | 3 | 6 |
| <b>Eukaryotic translation initiation factor 3 subunit F<br/>OS=Mus musculus GN=Eif3f PE=1 SV=2</b>                            | EIF3F_MOUSE | 38 kDa  | 2 | 3 | 6 |
| <b>Spermatogenesis-associated serine-rich protein 2<br/>OS=Mus musculus GN=Spats2 PE=1 SV=1</b>                               | SPAS2_MOUSE | 59 kDa  | 2 | 3 | 6 |
| <b>Peroxiredoxin-2 OS=Mus musculus GN=Prdx2 PE=1<br/>SV=3</b>                                                                 | PRDX2_MOUSE | 22 kDa  | 2 | 3 | 6 |
| <b>60S ribosomal protein L35a OS=Mus musculus<br/>GN=Rpl35a PE=2 SV=2</b>                                                     | RL35A_MOUSE | 13 kDa  | 2 | 2 | 4 |
| <b>Girdin OS=Mus musculus GN=Ccdc88a PE=1 SV=2</b>                                                                            | GRDN_MOUSE  | 216 kDa | 2 | 2 | 4 |
| <b>ATP-dependent Clp protease ATP-binding subunit clpX-<br/>like, mitochondrial OS=Mus musculus GN=Clpx PE=1<br/>SV=2</b>     | CLPX_MOUSE  | 69 kDa  | 2 | 2 | 4 |
| <b>Elongation factor 1-delta OS=Mus musculus GN=Eef1d<br/>PE=1 SV=3</b>                                                       | EF1D_MOUSE  | 31 kDa  | 2 | 2 | 4 |
| <b>Pyruvate dehydrogenase E1 component subunit beta,<br/>mitochondrial OS=Mus musculus GN=Pdhb PE=1 SV=1</b>                  | ODPB_MOUSE  | 39 kDa  | 2 | 2 | 4 |
| <b>RNA-binding protein PNO1 OS=Mus musculus<br/>GN=Pno1 PE=2 SV=1</b>                                                         | PNO1_MOUSE  | 27 kDa  | 2 | 2 | 4 |
| <b>Stress-induced-phosphoprotein 1 OS=Mus musculus<br/>GN=Stip1 PE=1 SV=1</b>                                                 | STIP1_MOUSE | 63 kDa  | 2 | 2 | 4 |
| <b>Vacuolar protein sorting-associated protein 16 homolog<br/>OS=Mus musculus GN=Vps16 PE=1 SV=3</b>                          | VPS16_MOUSE | 95 kDa  | 2 | 2 | 4 |
| <b>Vesicle transport through interaction with t-SNAREs<br/>homolog 1B OS=Mus musculus GN=Vti1b PE=1 SV=1</b>                  | VTI1B_MOUSE | 27 kDa  | 2 | 2 | 4 |
| <b>NADH dehydrogenase [ubiquinone] 1 alpha subcomplex<br/>subunit 12 OS=Mus musculus GN=Ndufa12 PE=2 SV=2</b>                 | NDUAC_MOUSE | 17 kDa  | 2 | 2 | 4 |
| <b>Cysteine-rich protein 1 OS=Mus musculus GN=Crip1<br/>PE=2 SV=2</b>                                                         | CRIP1_MOUSE | 9 kDa   | 2 | 2 | 4 |
| <b>NADH dehydrogenase [ubiquinone] 1 alpha subcomplex<br/>subunit 2 OS=Mus musculus GN=Ndufa2 PE=1 SV=3</b>                   | NDUA2_MOUSE | 11 kDa  | 2 | 2 | 4 |
| <b>Poly [ADP-ribose] polymerase 12 OS=Mus musculus<br/>GN=Parp12 PE=2 SV=3</b>                                                | PAR12_MOUSE | 80 kDa  | 2 | 2 | 4 |
| <b>Terminal uridylyltransferase 7 OS=Mus musculus<br/>GN=Zcchc6 PE=2 SV=3</b>                                                 | TUT7_MOUSE  | 169 kDa | 2 | 2 | 4 |
| <b>Uridine-cytidine kinase 1 OS=Mus musculus GN=Uck1<br/>PE=2 SV=2</b>                                                        | UCK1_MOUSE  | 31 kDa  | 2 | 2 | 4 |

|                                                                                                                   |             |         |   |   |   |
|-------------------------------------------------------------------------------------------------------------------|-------------|---------|---|---|---|
| <b>Ig kappa chain V-V region MOPC 21 OS=Mus musculus PE=1 SV=1</b>                                                | KV5A2_MOUSE | 15 kDa  | 2 | 2 | 2 |
| <b>Putative pre-mRNA-splicing factor ATP-dependent RNA helicase DHX15 OS=Mus musculus GN=Dhx15 PE=2 SV=2</b>      | DHX15_MOUSE | 91 kDa  | 2 | 1 | 2 |
| <b>Ribosomal protein 63, mitochondrial OS=Mus musculus GN=Mrp63 PE=2 SV=1</b>                                     | RT63_MOUSE  | 12 kDa  | 2 | 1 | 2 |
| <b>Alpha-2-macroglobulin OS=Mus musculus GN=A2m PE=1 SV=3</b>                                                     | A2M_MOUSE   | 166 kDa | 2 | 1 | 2 |
| <b>Protein FAM110B OS=Mus musculus GN=Fam110b PE=2 SV=1</b>                                                       | F110B_MOUSE | 40 kDa  | 2 | 1 | 2 |
| <b>Heat shock 70 kDa protein 4 OS=Mus musculus GN=Hspa4 PE=1 SV=1</b>                                             | HSP74_MOUSE | 94 kDa  | 2 | 1 | 2 |
| <b>H/ACA ribonucleoprotein complex subunit 1 OS=Mus musculus GN=Gar1 PE=2 SV=1</b>                                | GAR1_MOUSE  | 23 kDa  | 2 | 1 | 2 |
| <b>Trinucleotide repeat-containing gene 6B protein OS=Mus musculus GN=Tnrc6b PE=2 SV=2</b>                        | TNR6B_MOUSE | 192 kDa | 2 | 1 | 2 |
| <b>Baculoviral IAP repeat-containing protein 6 OS=Mus musculus GN=Birc6 PE=1 SV=2</b>                             | BIRC6_MOUSE | 532 kDa | 2 | 1 | 2 |
| <b>Large subunit GTPase 1 homolog OS=Mus musculus GN=Lsg1 PE=2 SV=2</b>                                           | LSG1_MOUSE  | 73 kDa  | 2 | 1 | 2 |
| <b>Heterogeneous nuclear ribonucleoprotein L-like OS=Mus musculus GN=Hnrnp1l PE=1 SV=3</b>                        | HNRL1_MOUSE | 64 kDa  | 2 | 1 | 2 |
| <b>PAP-associated domain-containing protein 5 OS=Mus musculus GN=Papd5 PE=1 SV=2</b>                              | PAPD5_MOUSE | 70 kDa  | 2 | 1 | 2 |
| <b>Serine/threonine-protein phosphatase 6 regulatory subunit 1 OS=Mus musculus GN=Ppp6r1 PE=1 SV=1</b>            | PP6R1_MOUSE | 95 kDa  | 2 | 1 | 2 |
| <b>28S ribosomal protein S21, mitochondrial OS=Mus musculus GN=Mrps21 PE=2 SV=1</b>                               | RT21_MOUSE  | 11 kDa  | 2 | 1 | 2 |
| <b>Complement C1q subcomponent subunit C OS=Mus musculus GN=C1qc PE=2 SV=2</b>                                    | C1QC_MOUSE  | 26 kDa  | 2 | 1 | 2 |
| <b>GAS2-like protein 1 OS=Mus musculus GN=Gas2l1 PE=2 SV=1</b>                                                    | GA2L1_MOUSE | 72 kDa  | 2 | 1 | 2 |
| <b>Aminoacyl tRNA synthase complex-interacting multifunctional protein 2 OS=Mus musculus GN=Aimp2 PE=1 SV=2</b>   | AIMP2_MOUSE | 35 kDa  | 2 | 1 | 2 |
| <b>Dolichyl-diphosphooligosaccharide--protein glycosyltransferase subunit 1 OS=Mus musculus GN=Rpn1 PE=2 SV=1</b> | RPN1_MOUSE  | 69 kDa  | 2 | 1 | 2 |
| <b>39S ribosomal protein L23, mitochondrial OS=Mus musculus GN=Mrpl23 PE=2 SV=1</b>                               | RM23_MOUSE  | 17 kDa  | 2 | 1 | 2 |
| <b>General transcription factor IIF subunit 2 OS=Mus musculus GN=Gtf2f2 PE=1 SV=1</b>                             | T2FB_MOUSE  | 28 kDa  | 2 | 1 | 2 |
| <b>Elongation factor 1-beta OS=Mus musculus GN=Eef1b PE=1 SV=5</b>                                                | EF1B_MOUSE  | 25 kDa  | 2 | 1 | 2 |
| <b>mRNA-capping enzyme OS=Mus musculus GN=Rngtt PE=1 SV=1</b>                                                     | MCE1_MOUSE  | 69 kDa  | 2 | 1 | 2 |
| <b>6-phosphofructokinase type C OS=Mus musculus GN=Pfkb PE=1 SV=1</b>                                             | K6PP_MOUSE  | 85 kDa  | 2 | 1 | 2 |
| <b>Cell division control protein 42 homolog OS=Mus musculus GN=Cdc42 PE=1 SV=2</b>                                | CDC42_MOUSE | 21 kDa  | 2 | 1 | 2 |
| <b>Proline-rich nuclear receptor coactivator 2 OS=Mus musculus GN=Pnrc2 PE=2 SV=1</b>                             | PNRC2_MOUSE | 15 kDa  | 2 | 1 | 2 |
| <b>UPF0688 protein C1orf174 homolog OS=Mus musculus PE=1 SV=1</b>                                                 | CA174_MOUSE | 25 kDa  | 2 | 1 | 2 |



|                                                                                           |             |        |   |   |   |
|-------------------------------------------------------------------------------------------|-------------|--------|---|---|---|
| <b>G-protein-signaling modulator 3 OS=Mus musculus<br/>GN=Gpsm3 PE=1 SV=2</b>             | GPSM3_MOUSE | 18 kDa | 2 | 1 | 2 |
| <b>Heterogeneous nuclear ribonucleoprotein D0 OS=Mus<br/>musculus GN=Hnrnpd PE=1 SV=2</b> | HNRPD_MOUSE | 38 kDa | 2 | 1 | 2 |

The blue-highlights are proteins examined by co-IPs in 293-T cells. The yellow-highlight is a PLEKHM1-binding protein recently identified by Witwicka et al (3).

**Table 6. Antibodies.**

| <b>Name</b>                                               | <b>Sources</b>                       | <b>Catalog #</b> | <b>Applications</b> | <b>Dilutions</b> |
|-----------------------------------------------------------|--------------------------------------|------------------|---------------------|------------------|
| <b>mouse monoclonal anti-actin</b>                        | GenScript                            | A00702           | WB                  | 2000             |
| <b>rabbit polyclonal anti-ATG12</b>                       | Cell Signaling                       | 2011             | WB                  | 1000             |
| <b>mouse monoclonal anti-Cathepsin K</b>                  | EMD Millipore                        | MAB3324          | WB, IF              | WB: 5000; IF:300 |
| <b>rabbit polyclonal anti-cfms</b>                        | Cell Signaling                       | 3152             | WB                  | 1000             |
| <b>mouse monoclonal anti-EEA1</b>                         | BD Biosciences                       | 610456           | IF                  | 300              |
| <b>rabbit polyclonal anti-EGF-R</b>                       | EMD Millipore                        | 06-847           | WB                  | 1000             |
| <b>mouse monoclonal anti-FLAG (M2)</b>                    | Sigma-Aldrich                        | F1804            | WB                  | 2000             |
| <b>mouse monoclonal anti-FLAG-HRP</b>                     | Sigma-Aldrich                        | A8592            | WB                  | 2000             |
| <b>mouse monoclonal anti-GM130</b>                        | BD Biosciences                       | 610822           | IF                  | 250              |
| <b>mouse monoclonal anti-GS28</b>                         | BD Biosciences                       | 611184           |                     | 250              |
| <b>mouse monoclonal anti-HA</b>                           | Covance                              | MMS-101P         | WB                  | 1000             |
| <b>rabbit monoclonal anti-HA</b>                          | Cell Signaling                       | 3724             | WB                  | 2000             |
| <b>rat monoclonal anti-LAMP-2</b>                         | Developmental Studies Hybridoma Bank | GL2A7            | IF                  | 300              |
| <b>rat monoclonal anti-LAMP-2</b>                         | Developmental Studies Hybridoma Bank | ABL-93           | WB                  | 1000             |
| <b>anti-LAMP-1</b>                                        | Developmental Studies Hybridoma Bank | 1D4B             | IF                  | 300              |
| <b>rabbit polyconal anti-LC3</b>                          | Cell Signaling                       | 4108             | WB                  | 1000             |
| <b>mouse monoclonal anti-mTOR</b>                         | Cell Signaling                       | 4517             | WB                  | 1000             |
| <b>rabbit polyclonal anti-phospho-mTOR (ser2448)</b>      | Cell Signaling                       | 2971             | WB                  | 1000             |
| <b>mouse monoclonal anti-myc (9E10)</b>                   | EMD Millipore                        | 05-419           | WB                  | 1000             |
| <b>mouse monoclonal anti-myc-HRP (4A6)</b>                | EMD Millipore                        | 16-213           | WB                  | 1000             |
| <b>rabbit polyconal anti-NFATc1</b>                       | Santa Cruz Biotechnology             | sc-7294          | WB                  | 500              |
| <b>rabbit polyclonal anti-TFEB</b>                        | Bethyl                               | A303-673A        | WB                  | 2000             |
| <b>Goat polyclonal anti-TFEB</b>                          | Thermo-Fisher                        | PA1-31552        | IF                  | 200              |
| <b>chicken polyclonal anti-human transferrin</b>          | EMD Millipore                        | AB3467           | IF                  | 300              |
| <b>mouse monoclonal anti-transferrin receptor (H68.4)</b> | Life Technologies                    | 13-6800          | IF                  | 300              |
| <b>mouse monoclonal anti-beta tubulin</b>                 | Sigma-Aldrich                        | T5201            | WB, IF              | WB:5000; IF:500  |

**Table 7. Sequences of cloning primers**

| Name                                      | Sequence                                                                              |
|-------------------------------------------|---------------------------------------------------------------------------------------|
| HA- <i>Plekhh1</i> (Xho-I) for            | 5'-ATATCTCGAGGAAATGTATCCTTACGATGTGCCTGATTATGCACTCT<br>CAGTGGAGAATGGCCTG-3'            |
| <i>Plekhh1</i> (Not-I) rev                | 5'-ATATATATTGCGGCCGCTTAACTGACAACGTTCTGTTCCCTG-3'                                      |
| <i>Plekhh1</i> -hu (Not-I) rev            | 5'-ATATATATGCGGCCGCTCATCTGTGGGTGATGGCTTTTCAG-3'                                       |
| <i>Plekhh1</i> -ia (Not-I) rev            | 5'-ATATATATGCGGCCGCTAGGCTGTGGAGGGAGAGGGCGTCTGGA<br>ACATGGGGGTGTC-3'                   |
| <i>Plekhh1</i> -R714C-for                 | 5'-CTGTATGCAGACTGTACCTGGGTCCCCTATATCTTTTCCCTG-3'                                      |
| <i>Plekhh1</i> -R714C-rev                 | 5'-GGACCCAGGTACAGTCTGCATACAGATACAAAAGGGAC-3'                                          |
| <i>Plekhh1</i> -ΔRUN (Xho-I) for          | 5'-TATCTCGAGATGTATCCTTACGATGTGCCTGATTATGCAATCTTAAAT<br>GAATGGACTC-3'                  |
| <i>Plekhh1</i> -ΔPH1 for                  | 5'-CCATTCCGGGGCCGCCCTCAGCAGGAAGATGAG-3'                                               |
| <i>Plekhh1</i> -ΔPH1 rev                  | 5'-CTGCTGAGGGCGGCCCGGAATGGGTTGGACAG-3'                                                |
| <i>Plekhh1</i> -ΔPH2 for                  | 5'-GAACCAGATGCTCTAGAGTCAGCTGAGGAGGCTG-3'                                              |
| <i>Plekhh1</i> -ΔPH2 rev                  | 5'-GCTGACTCTAGAGCATCTGGTTCTGGAACCTG-3'                                                |
| <i>Plekhh1</i> -ΔPH for                   | 5'-CCATTCCGGGGCCCTAGAGTCAGCTGAGGAGGCTG-3'                                             |
| <i>Plekhh1</i> -ΔPH rev                   | 5'-CTGACTCTAGGCCCGGAATGGGTTGGACAG-3'                                                  |
| <i>Plekhh1</i> -ΔC1 (Not-I) rev           | 5'-ATATATATGCGGCCGCTTACTGGGATGCGAATTCAATCAG-3'                                        |
| <i>Plekhh1</i> -N (Not-I) rev             | 5'-ATATATATGCGGCCGCTTATTGCCTTCGGTGCACCACACAG-3'                                       |
| HA- <i>Plekhh1</i> -C (Xho-I) for         | 5'-ATATCTCGAGATGTATCCTTACGATGTGCCTGATTATGCAGTGCCT<br>CACAGGCCTGTG-3'                  |
| <i>Plekhh1</i> <sup>Y949A/L950A</sup> for | 5'-ACTTCTGGGGGACGCCGCGGCCCTGTGCCGAAGTGGTGC-3'                                         |
| <i>Plekhh1</i> <sup>Y949A/L950A</sup> rev | 5'-TTCGGCACAGGCCCGCGCGTCCCCAGAAGTTTCAGCTGC-3'                                         |
| <i>Def8</i> (BamH-I) for                  | 5'-ATTGGATCCGCTATGGAATATGATGAGAAGCTG-3'                                               |
| <i>Def8</i> -FLAG (Xho-I) rev             | 5'-ATCGCTCGAGCTACTTGTCTCATCGTCTTTGTAGTCGGCATCCATG<br>TCTAGGCCAGG-3'                   |
| Myc- <i>Def8</i> (BamH-I) for             | 5'-ATTGGATCCGCCGCCATGGAGCAGAACTCATCTCTGAAGAGGATC<br>TGAATGAAGAATATGATGAGAAGCTGGTTC-3' |
| <i>Def8</i> (Xho-I) rev                   | 5'-ATCGCTCGAGCTAGGCATCCATGTCTAGGCCAGG-3'                                              |
| <i>Kifc1</i> (Xho-I) for                  | 5'-ATCGCTCGAGACCATGGACGTGCAGGCGCAG-3'                                                 |
| <i>Kifc1</i> -FLAG (Sac-II) rev           | 5'-AATTCCGCGGTCACTTGTCTCATCGTCTTTGTAGTCCTTCTTATT<br>AGCCTGAGCAGTAC-3'                 |
| <i>Clasp2</i> (BamH-I) for                | 5'-ATTGGATCCGGAATGAGGCGGCTGATTTGC-3'                                                  |

---

*Clasp2*-FLAG (Xho-I) rev 5'-ATCGCTCGAGCTACTTGTGCGTCATCGTCTTTGTAGTCACTCTGTCCA  
GAAACATCAGC-3'

*Tpx2* (Xho-I) for 5'-ATCGCTCGAGGGCAATGTCACAAGTCCCTAC-3'

*Tpx2*-FLAG (Sac-II) rev 5'-ATATCCGCGGCTACTTGTGCGTCATCGTCTTTGTAGTCCCTGGAACCGA  
GTGGAGAAC-3'

*Fam98a* (BamH-I) for 5'-ATTGGATCCGCCGCCATGGAGACTGACATCTTGGAG-3'

*Fam98a*-FLAG (EcoR-I) rev 5'-ATTGAATTCTCACTTGTGCGTCATCGTCTTTGTAGTCACTAGTATAAT  
GTCTTCCTTGTC-3'

*Ndel1* (BamH-I) for 5'-ATTGGATCCTGATCATGGATGGTGAAGATATAC-3'

*Ndel1*-FLAG (Xho-I) rev 5'-ATCGCTCGAGTCACTTGTGCGTCATCGTCTTTGTAGTCCACACTGAGA  
GGCAGCATAAC-3'

*Map3k7* (BamH-I) for 5'-ATTGGATCCGATCATGTGCGACAGCCTCCG-3'

*Map3k7*-FLAG (Xho-I) rev 5'-ATCGCTCGAGTCACTTGTGCGTCATCGTCTTTGTAGTCTGAAGTGCCT  
TGTCGTTTCTG-3'

*Rap1b* (BamH-I) for 5'-ATTGGATCCACCATGCGTGAATATAAGCTCG-3'

*Rap1b*-FLAG (Xho-I) rev 5'-ATCGCTCGAGTACTTGTGCGTCATCGTCTTTGTAGTCAAGCAGCTGA  
CACGATGACTTT-3'

*Lamp-2a* (EcoR-I) for 5'-ATCGGAATTCACGATGTGCCTCTCTCCG -3'

*Lamp-2a* (BamH-I) rev 5'-AATTGGATCCCGTCCTCCACCGCCTCCAAATTGCTCATATCCAGTAT  
G -3'

*eGfp* (Xho-I) rev 5'- ATATCTCGAGTACTTGTACAGCTCGTCCATGC-3'

FLAG-*Rab7* (Xho-I) for 5'-ATATCTCGAGATGGACTACAAAGACGATGACGACAAGACCTCTAGGA  
AGAAAGTGTTG-3'

*Rab7* (Not-I) rev 5'-ATATATATGCGGCCGCTCAACAACCTGCAGCTTTCTGC-3'

---

## References

1. Takeshita, S., Kaji, K., and Kudo, A. 2000. Identification and characterization of the new osteoclast progenitor with macrophage phenotypes being able to differentiate into mature osteoclasts. *J Bone Miner Res* 15:1477-1488.
2. Xu, J. 2005. Preparation, culture, and immortalization of mouse embryonic fibroblasts. *Curr Protoc Mol Biol* Chapter 28:Unit 28 21.
3. Witwicka, H., Jia, H., Kutikov, A., Reyes-Gutierrez, P., Li, X., and Odgren, P.R. 2015. TRAFD1 (FLN29) Interacts with Plekhm1 and Regulates Osteoclast Acidification and Resorption. *PLoS One* 10:e0127537.





Full unedited blot images for Figure 7

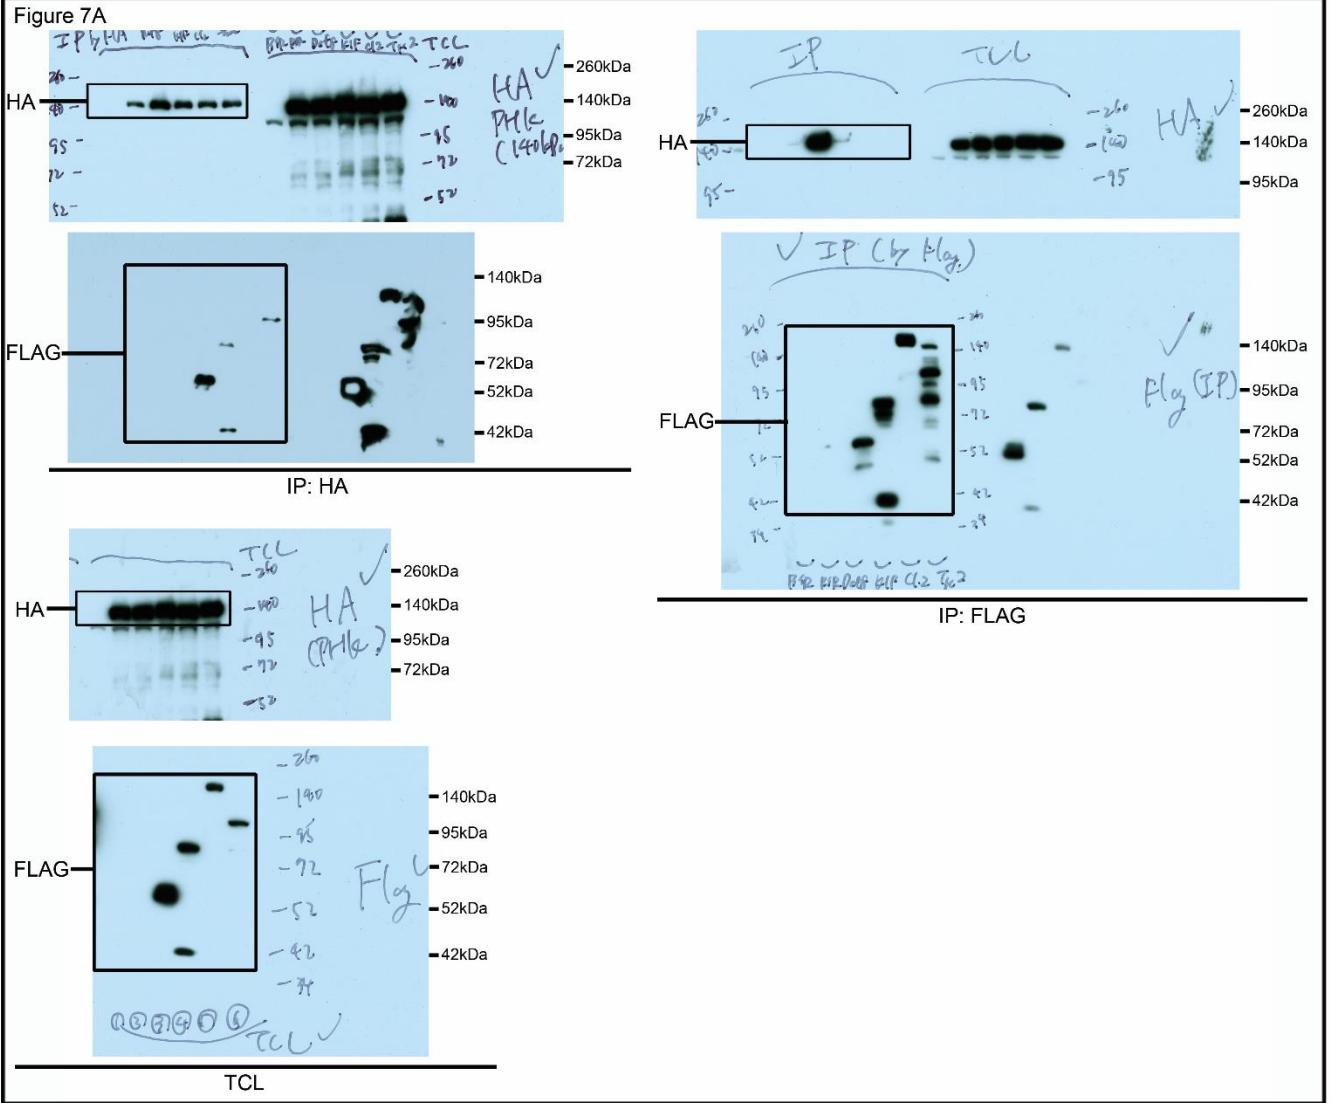

Full unedited blot images for Figure 7 & 9

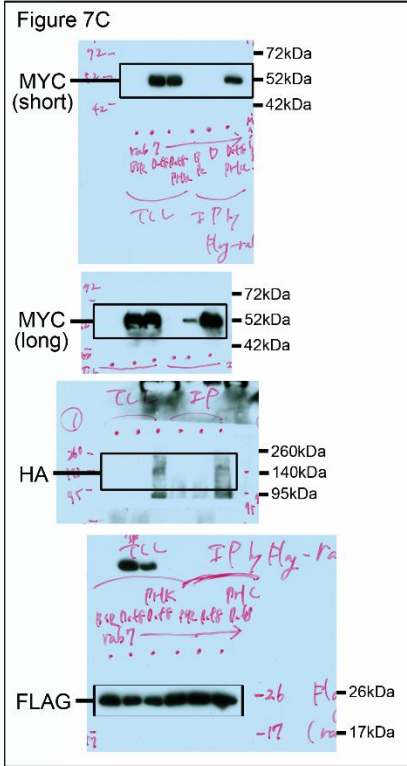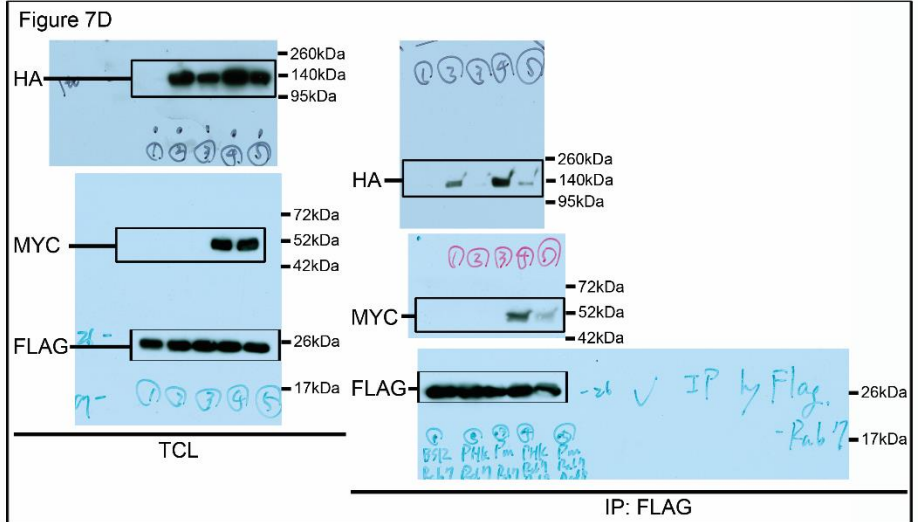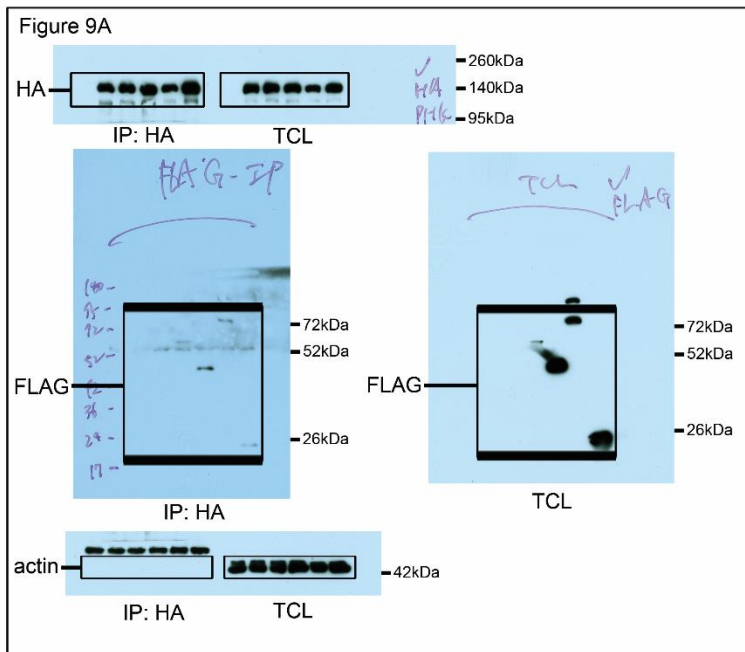



Full unedited blot images for Supplemental Figure 4, 5, 13, & 14

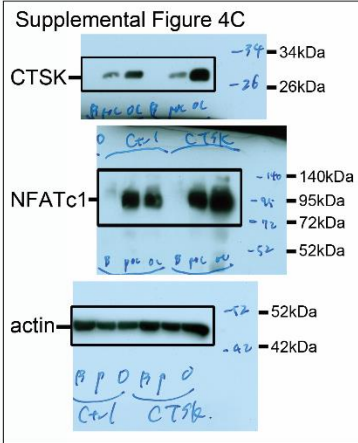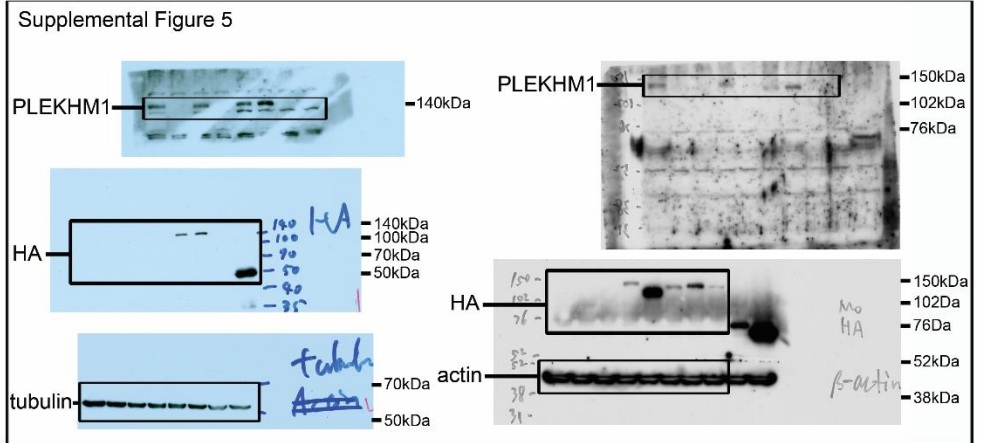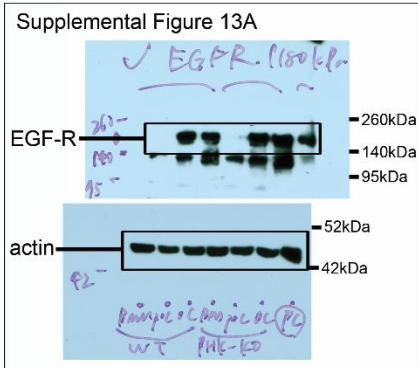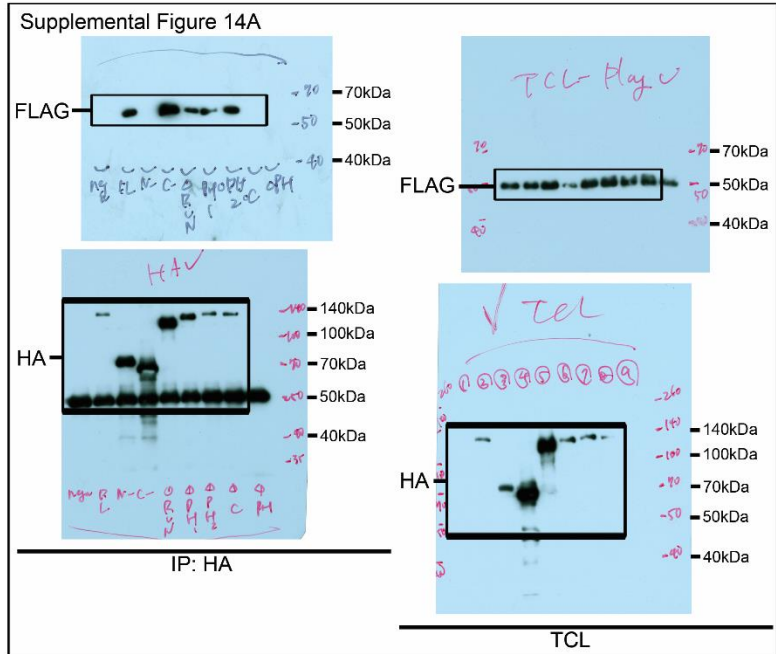



Full unedited blot images for Supplemental Figure 14 & 15

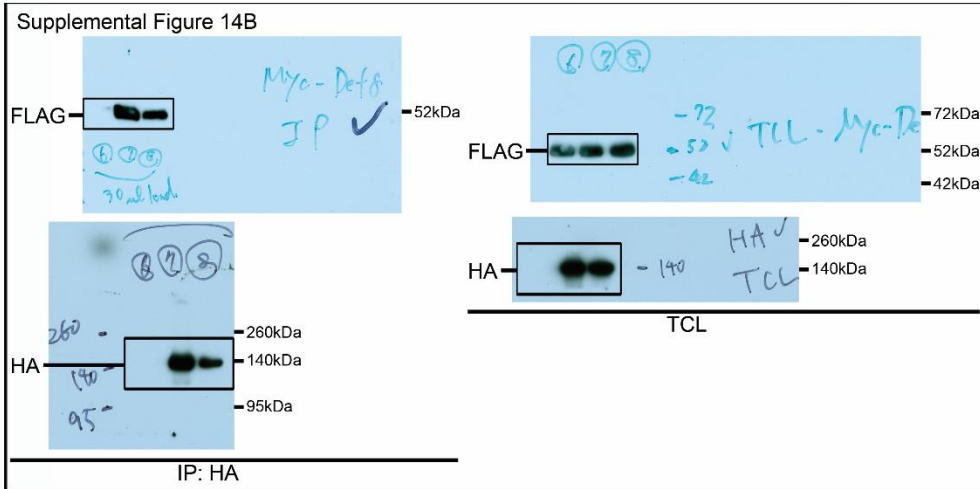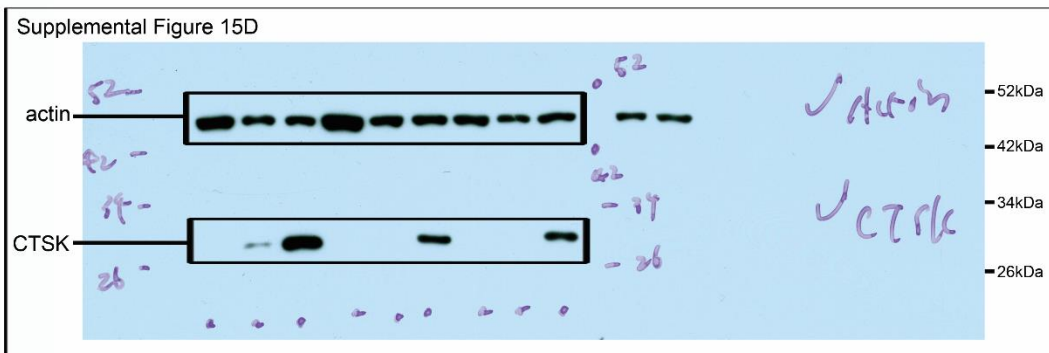

Full unedited blot images for Supplemental Figure 16

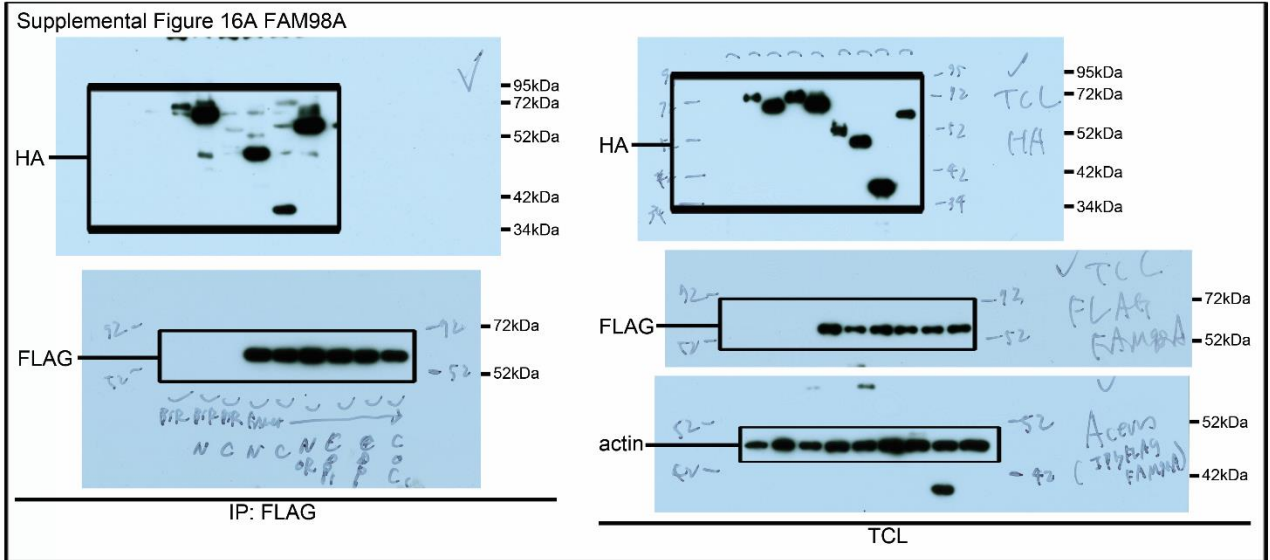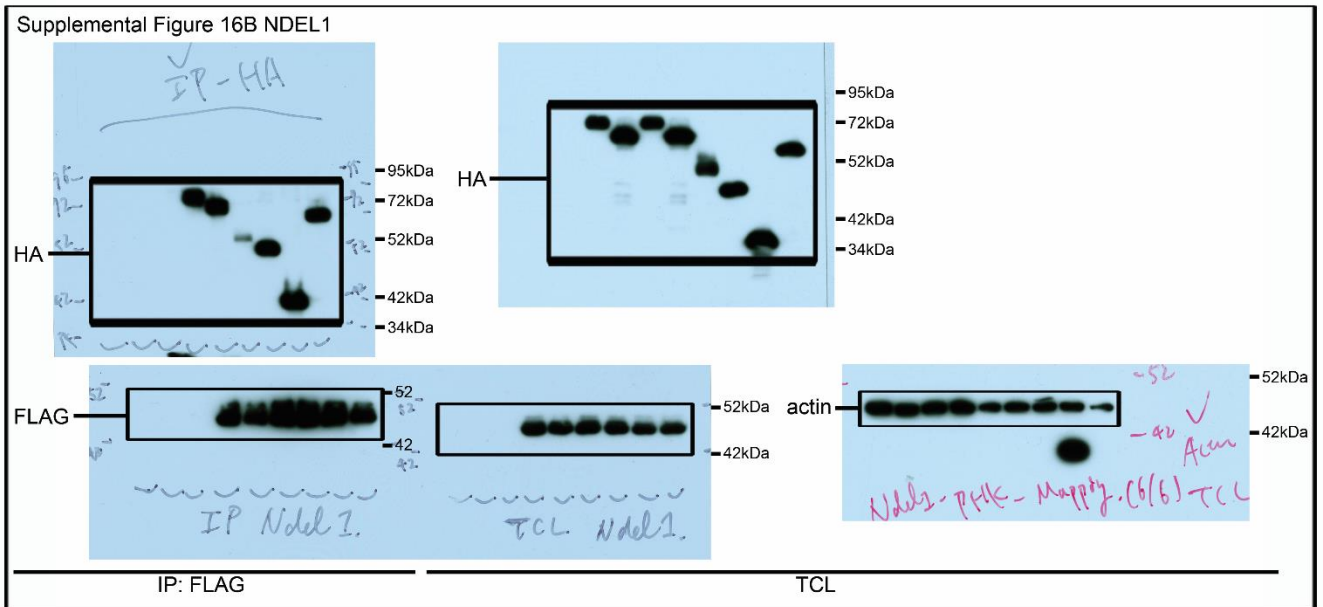

Supplement: jciinsight-1-86330-s001.pdf [file jciinsight-1-86330-s001.pdf]
